# Supplementary material for: Climate and COVID-19 transmission: a cross-sectional study in Africa
Source: PubMed Central journal article supplement (PMC10618194; doi:10.1038/s41598-023-46007-0), 2023-10-31

## Supplementary Information

### Climate and COVID-19 Transmission: A Cross-Sectional Study in Africa

Ousmane Koanda<sup>1</sup>, Roland Yonaba<sup>1,\*</sup>, Fowe Tazen<sup>1</sup>, Héra Karoui<sup>1</sup>, Mohamed Lamine Sidibé<sup>1</sup>,  
Babacar Lèye<sup>1</sup>, Mamadou Diop<sup>2</sup>, Harinaivo Anderson Andrianisa<sup>1</sup>, Harouna Karambiri<sup>1</sup>

<sup>1</sup> *Laboratoire Eaux, Hydro-Systèmes et Agriculture (LEHSA), Institut International d'Ingénierie de l'Eau et de l'Environnement (2iE), Ouagadougou, Burkina Faso*

<sup>2</sup> *Laboratoire Eco-Matériaux et Habitat Durable (LEMHaD), Institut International d'Ingénierie de l'Eau et de l'Environnement (2iE), Ouagadougou, Burkina Faso*

\* Corresponding author; email: [ousmane.yonaba@2ie-edu.org](mailto:ousmane.yonaba@2ie-edu.org) / [roland.yonaba@gmail.com](mailto:roland.yonaba@gmail.com)

**Table S1.** Summary statistics of cumulative cases per region in Africa (as of 10/30/2022).

| <b>Regions</b> | <b>cases (million people)</b> |            |            |            |            | <b>cases (per 1000.million people)</b> |            |            |            |            |
|----------------|-------------------------------|------------|------------|------------|------------|----------------------------------------|------------|------------|------------|------------|
|                | <b>NAf</b>                    | <b>Waf</b> | <b>CAf</b> | <b>Eaf</b> | <b>SAf</b> | <b>NAf</b>                             | <b>Waf</b> | <b>CAf</b> | <b>Eaf</b> | <b>SAf</b> |
| <b>Min</b>     | 0.063                         | 0.008      | 0.006      | 0.010      | 0.008      | 1.409                                  | 0.374      | 0.448      | 0.641      | 2.345      |
| <b>Q1</b>      | 0.167                         | 0.011      | 0.015      | 0.023      | 0.072      | 5.506                                  | 1.396      | 3.031      | 2.224      | 8.938      |
| <b>Q2</b>      | 0.507                         | 0.033      | 0.025      | 0.047      | 0.200      | 13.155                                 | 2.790      | 4.390      | 4.096      | 17.344     |
| <b>Q3</b>      | 0.831                         | 0.075      | 0.093      | 0.151      | 0.279      | 53.366                                 | 4.779      | 11.733     | 8.067      | 65.729     |
| <b>Max</b>     | 1.265                         | 0.265      | 0.122      | 0.493      | 4.003      | 95.988                                 | 111.005    | 27.892     | 475.202    | 207.453    |

*Regions: Northern Africa (NAf), Western Africa (Waf), Central Africa (CAf), Eastern Africa (Eaf) and Southern Africa (SAf). Min: minimum value for countries in the region. Max: maximum value for countries in the region. Q1, Q2, Q3: First, second and third quartiles.*

**Table S2.** Correspondence table between African countries and regions

| NAf (Northern Africa) |            | WAf (West Africa)   |               | EAf (West Africa)   |             | CAf (Central Africa) |                          | SAf (Central Africa) |              |
|-----------------------|------------|---------------------|---------------|---------------------|-------------|----------------------|--------------------------|----------------------|--------------|
| ISO Code              | Name       | ISO Code            | Name          | ISO Code            | Name        | ISO Code             | Name                     | ISO Code             | Name         |
| DZA                   | Algeria    | BEN                 | Benin         | BDI                 | Burundi     | AGO                  | Angola                   | BWA                  | Botswana     |
| EGY                   | Egypt      | BFA                 | Burkina Faso  | DJI                 | Djibouti    | CMR                  | Cameroon                 | COM                  | Comoros      |
| LBY                   | Libya      | CPV                 | Cabo Verde    | ERI                 | Eritrea     | CAF                  | Central African Republic | SWZ                  | Eswatini     |
| MRT                   | Mauritania | CIV                 | Cote d'Ivoire | ETH                 | Ethiopia    | TCD                  | Chad                     | LSO                  | Lesotho      |
| MAR                   | Morocco    | GMB                 | Gambia        | KEN                 | Kenya       | COG                  | Congo (Brazzaville)      | MDG                  | Madagascar   |
| SDN                   | Sudan      | GHA                 | Ghana         | RWA                 | Rwanda      | COD                  | Congo (Kinshasa)         | MWI                  | Malawi       |
| TUN                   | Tunisia    | GIN                 | Guinea        | SYC                 | Seychelles  | GNQ                  | Equatorial Guinea        | MUS                  | Mauritius    |
|                       |            | GNB                 | Guinea-Bissau | SOM                 | Somalia     | GAB                  | Gabon                    | MOZ                  | Mozambique   |
|                       |            | LBR                 | Liberia       | SSD                 | South Sudan | STP                  | Sao Tome and Principe    | NAM                  | Namibia      |
|                       |            | MLI                 | Mali          | TZA                 | Tanzania    |                      |                          | ZAF                  | South Africa |
|                       |            | NER                 | Niger         | UGA                 | Uganda      |                      |                          | ZMB                  | Zambia       |
|                       |            | NGA                 | Nigeria       |                     |             |                      |                          | ZWE                  | Zimbabwe     |
|                       |            | SEN                 | Senegal       |                     |             |                      |                          |                      |              |
|                       |            | SLE                 | Sierra Leone  |                     |             |                      |                          |                      |              |
|                       |            | TGO                 | Togo          |                     |             |                      |                          |                      |              |
| <i>7 countries</i>    |            | <i>15 countries</i> |               | <i>11 countries</i> |             | <i>9 countries</i>   |                          | <i>12 countries</i>  |              |

**Table S3.** Statistical description of climate variables in African regions.

| Regions    | NAf              | Waf      | CAf     | Eaf     | Saf     | NAf               | Waf  | CAf  | Eaf  | Saf  | NAf                                 | Waf  | CAf  | Eaf  | Saf  |
|------------|------------------|----------|---------|---------|---------|-------------------|------|------|------|------|-------------------------------------|------|------|------|------|
|            | <b>pr (mm)</b>   |          |         |         |         | <b>tdew (°C)</b>  |      |      |      |      | <b>tmin (°C)</b>                    |      |      |      |      |
| <b>Min</b> | 16.3             | 423.1    | 636.5   | 1,127.3 | 778.5   | -0.1              | 1.3  | 4.6  | 12.2 | 2.0  | 13.1                                | 20.2 | 16.2 | 14.0 | 3.9  |
| <b>Q1</b>  | 35.3             | 2,103.1  | 3,656.0 | 1,398.3 | 1,822.5 | 3.1               | 14.6 | 18.8 | 15.5 | 6.4  | 15.4                                | 21.4 | 20.7 | 16.1 | 12.9 |
| <b>Q2</b>  | 202.3            | 3,815.5  | 4,564.7 | 3,494.1 | 2,580.7 | 5.1               | 18.7 | 21.0 | 16.7 | 12.1 | 15.6                                | 22.2 | 21.5 | 19.9 | 14.2 |
| <b>Q3</b>  | 909.9            | 5,488.3  | 4,714.5 | 3,826.1 | 3,498.2 | 6.9               | 20.6 | 22.4 | 18.2 | 17.6 | 19.0                                | 22.5 | 21.8 | 22.6 | 20.8 |
| <b>Max</b> | 1,865.5          | 10,044.6 | 6,599.3 | 6,329.1 | 4,767.3 | 8.5               | 22.5 | 23.4 | 23.7 | 22.5 | 20.0                                | 23.1 | 26.1 | 27.1 | 26.4 |
|            | <b>tmoy (°C)</b> |          |         |         |         | <b>tmax (°C)</b>  |      |      |      |      | <b>rh (%)</b>                       |      |      |      |      |
| <b>Min</b> | 19.3             | 23.7     | 21.7    | 18.3    | 9.5     | 27.2              | 24.4 | 26.9 | 24.0 | 16.2 | 22.7                                | 22.3 | 28.1 | 51.0 | 37.2 |
| <b>Q1</b>  | 22.0             | 25.4     | 24.6    | 21.5    | 18.9    | 29.5              | 30.8 | 28.1 | 27.8 | 26.2 | 28.6                                | 53.3 | 73.6 | 59.1 | 55.6 |
| <b>Q2</b>  | 23.2             | 26.6     | 25.0    | 25.6    | 20.6    | 31.4              | 32.8 | 28.7 | 28.7 | 27.2 | 38.7                                | 67.9 | 81.3 | 63.2 | 64.6 |
| <b>Q3</b>  | 26.1             | 28.0     | 25.2    | 27.6    | 24.8    | 34.0              | 34.9 | 29.8 | 33.6 | 29.1 | 44.3                                | 76.9 | 84.7 | 76.7 | 72.5 |
| <b>Max</b> | 26.7             | 29.4     | 27.9    | 30.9    | 26.9    | 34.3              | 36.6 | 35.8 | 36.1 | 31.7 | 49.8                                | 87.0 | 89.0 | 81.7 | 79.2 |
|            | <b>ah (%)</b>    |          |         |         |         | <b>wspd (m/s)</b> |      |      |      |      | <b>insol (MJ/m<sup>2</sup>/day)</b> |      |      |      |      |
| <b>Min</b> | 4.9              | 6.4      | 7.9     | 11.4    | 6.2     | 2.0               | 1.5  | 0.1  | 0.6  | 1.8  | 20.5                                | 16.7 | 14.9 | 16.8 | 17.3 |
| <b>Q1</b>  | 6.4              | 14.0     | 16.6    | 13.5    | 8.4     | 3.1               | 1.8  | 0.3  | 1.7  | 2.4  | 21.2                                | 18.1 | 16.2 | 19.2 | 19.5 |
| <b>Q2</b>  | 7.3              | 16.7     | 18.4    | 14.9    | 11.6    | 3.2               | 2.2  | 1.0  | 2.1  | 2.7  | 22.0                                | 19.2 | 16.9 | 20.6 | 20.3 |
| <b>Q3</b>  | 8.6              | 18.4     | 19.9    | 16.0    | 15.3    | 3.5               | 2.7  | 1.7  | 3.3  | 3.3  | 22.7                                | 20.9 | 19.5 | 21.6 | 21.0 |
| <b>Max</b> | 10.1             | 20.1     | 20.8    | 21.2    | 19.7    | 3.8               | 5.6  | 3.6  | 4.6  | 5.9  | 23.6                                | 23.3 | 23.9 | 22.7 | 22.4 |

Regions: Northern Africa (NAf), Western Africa (Waf), Central Africa (CAf), Eastern Africa (Eaf) and Southern Africa (SAf). Min: minimum value for countries in the region. Max: maximum value for countries in the region. Q1, Q2, Q3: First, second and third quartiles.

**Table S4.** Complete list of significant (Wald test – p-value < 5%) *RegARIMA* models fitted to 54 African countries cumulative cases.

| N° | Country | Climate variable | Lag (days) | RegARIMA model (p,d,q) | NRMSE  | NMAE   | Coefficient of climate variable | Wald test (p-value) | Spearman's $\rho$ | Spearman test (p-value) |
|----|---------|------------------|------------|------------------------|--------|--------|---------------------------------|---------------------|-------------------|-------------------------|
| 1  | AGO     | insol            | 11         | (1,1,1)                | 0.0019 | 0.0005 | -0.0008                         | 0.0163              | -0.133            | <0.0001                 |
| 2  | BDI     | pr               | 3          | (1,1,2)                | 0.0043 | 0.0014 | 0.0061                          | 0.0183              | 0.073             | 0.0275                  |
| 3  | BDI     | tmax             | 15         | (1,1,1)                | 0.0044 | 0.0015 | -0.0024                         | 0.0076              | -0.139            | <0.0001                 |
| 4  | BEN     | pr               | 23         | (2,1,2)                | 0.0056 | 0.0020 | -0.0078                         | 0.0005              | -0.083            | 0.0130                  |
| 5  | CIV     | ah               | 15         | (2,1,4)                | 0.0012 | 0.0006 | -0.0016                         | 0.0040              | -0.166            | <0.0001                 |
| 6  | CIV     | tdew             | 15         | (2,1,4)                | 0.0013 | 0.0006 | -0.0015                         | 0.0133              | -0.168            | <0.0001                 |
| 7  | CIV     | tmoy             | 9          | (2,1,4)                | 0.0012 | 0.0006 | -0.0010                         | 0.0104              | -0.071            | 0.0304                  |
| 8  | CIV     | wspd             | 17         | (2,1,4)                | 0.0013 | 0.0006 | 0.0005                          | 0.0210              | 0.136             | <0.0001                 |
| 9  | COD     | pr               | 17         | (2,1,4)                | 0.0025 | 0.0010 | 0.0018                          | 0.0221              | 0.091             | 0.0059                  |
| 10 | COG     | ah               | 8          | (3,1,2)                | 0.0034 | 0.0017 | -0.0033                         | 0.0012              | -0.189            | <0.0001                 |
| 11 | COG     | tdew             | 8          | (3,1,2)                | 0.0034 | 0.0017 | -0.0032                         | 0.0022              | -0.188            | <0.0001                 |
| 12 | COM     | ah               | 13         | (4,1,2)                | 0.0023 | 0.0009 | -0.0021                         | 0.0232              | -0.080            | 0.0185                  |
| 13 | COM     | tdew             | 13         | (4,1,2)                | 0.0023 | 0.0009 | -0.0021                         | 0.0272              | -0.069            | 0.0422                  |
| 14 | DZA     | tdew             | 1          | (3,2,3)                | 0.0002 | 0.0001 | -0.0001                         | 0.0486              | -0.087            | 0.0071                  |
| 15 | EGY     | wspd             | 4          | (5,1,3)                | 0.0007 | 0.0002 | 0.0004                          | 0.0009              | 0.073             | 0.0243                  |
| 16 | ERI     | insol            | 28         | (2,1,2)                | 0.0019 | 0.0009 | -0.0009                         | 0.0450              | -0.068            | 0.0404                  |
| 17 | ETH     | tmoy             | 18         | (1,1,2)                | 0.0005 | 0.0002 | -0.0004                         | 0.0138              | -0.070            | 0.0350                  |
| 18 | GAB     | rh               | 13         | (2,1,3)                | 0.0023 | 0.0011 | 0.0013                          | 0.0399              | 0.340             | <0.0001                 |
| 19 | GAB     | tmax             | 4          | (2,1,3)                | 0.0023 | 0.0011 | -0.0013                         | 0.0035              | -0.319            | <0.0001                 |

| N° | Country | Climate variable | Lag (days) | RegARIMA model (p,d,q) | NRMSE  | NMAE   | Coefficient of climate variable | Wald test (p-value) | Spearman's $\rho$ | Spearman test (p-value) |
|----|---------|------------------|------------|------------------------|--------|--------|---------------------------------|---------------------|-------------------|-------------------------|
| 20 | GAB     | tmoy             | 4          | (2,1,3)                | 0.0023 | 0.0011 | -0.0017                         | 0.0057              | -0.384            | <0.0001                 |
| 21 | GHA     | rh               | 7          | (1,1,4)                | 0.0015 | 0.0009 | -0.0012                         | 0.0393              | -0.209            | <0.0001                 |
| 22 | GIN     | ah               | 0          | (2,1,1)                | 0.0013 | 0.0008 | -0.0016                         | 0.0039              | -0.083            | 0.0112                  |
| 23 | GIN     | tdew             | 0          | (2,1,1)                | 0.0013 | 0.0008 | -0.0014                         | 0.0121              | -0.083            | 0.0117                  |
| 24 | GNB     | rh               | 6          | (1,1,2)                | 0.0023 | 0.0011 | 0.0023                          | 0.0374              | 0.087             | 0.0085                  |
| 25 | GNB     | tmax             | 0          | (1,1,2)                | 0.0023 | 0.0011 | -0.0026                         | 0.0051              | -0.132            | <0.0001                 |
| 26 | GNB     | tmoy             | 9          | (1,1,2)                | 0.0023 | 0.0011 | -0.0034                         | 0.0089              | -0.107            | 0.0012                  |
| 27 | KEN     | pr               | 26         | (4,1,2)                | 0.0006 | 0.0003 | -0.0015                         | <0.0001             | -0.157            | <0.0001                 |
| 28 | KEN     | wspd             | 7          | (4,1,2)                | 0.0006 | 0.0003 | 0.0006                          | 0.0176              | 0.129             | <0.0001                 |
| 29 | LBR     | ah               | 21         | (2,1,2)                | 0.0038 | 0.0015 | -0.0051                         | 0.0079              | -0.101            | 0.0023                  |
| 30 | LBR     | insol            | 1          | (2,1,2)                | 0.0038 | 0.0013 | 0.0017                          | 0.0248              | 0.075             | 0.0224                  |
| 31 | LBR     | tdew             | 21         | (2,1,2)                | 0.0038 | 0.0015 | -0.0051                         | 0.0114              | -0.098            | 0.0031                  |
| 32 | MDG     | insol            | 28         | (3,1,5)                | 0.0026 | 0.0011 | -0.0015                         | 0.0110              | -0.066            | 0.0491                  |
| 33 | MDG     | tmoy             | 12         | (3,1,5)                | 0.0025 | 0.0011 | -0.0031                         | 0.0087              | -0.088            | 0.0081                  |
| 34 | MOZ     | rh               | 0          | (1,1,0)                | 0.0011 | 0.0004 | -0.0005                         | 0.0313              | -0.184            | <0.0001                 |
| 35 | MOZ     | tdew             | 0          | (1,1,0)                | 0.0011 | 0.0004 | -0.0006                         | 0.0313              | -0.088            | 0.0077                  |
| 36 | MRT     | insol            | 25         | (1,1,0)                | 0.0006 | 0.0003 | -0.0003                         | 0.0078              | -0.234            | <0.0001                 |
| 37 | MWI     | rh               | 26         | (2,1,4)                | 0.0009 | 0.0004 | 0.0006                          | 0.0065              | 0.148             | <0.0001                 |
| 38 | RWA     | tmin             | 0          | (3,1,3)                | 0.0010 | 0.0003 | -0.0006                         | 0.0110              | -0.080            | 0.0150                  |
| 39 | RWA     | tmoy             | 4          | (3,1,4)                | 0.0010 | 0.0003 | -0.0009                         | 0.0029              | -0.103            | 0.0017                  |
| 40 | SEN     | ah               | 3          | (2,1,2)                | 0.0007 | 0.0003 | 0.0006                          | 0.0428              | 0.090             | 0.0060                  |

| N° | Country | Climate variable | Lag (days) | RegARIMA model (p,d,q) | NRMSE  | NMAE   | Coefficient of climate variable | Wald test (p-value) | Spearman's $\rho$ | Spearman test (p-value) |
|----|---------|------------------|------------|------------------------|--------|--------|---------------------------------|---------------------|-------------------|-------------------------|
| 41 | SEN     | insol            | 26         | (2,1,2)                | 0.0007 | 0.0004 | -0.0003                         | 0.0058              | -0.229            | <0.0001                 |
| 42 | SLE     | insol            | 25         | (1,1,2)                | 0.0014 | 0.0006 | 0.0005                          | 0.0301              | 0.108             | 0.0012                  |
| 43 | SOM     | rh               | 19         | (2,1,2)                | 0.0028 | 0.0013 | -0.0027                         | 0.0096              | -0.201            | <0.0001                 |
| 44 | SOM     | tmoy             | 5          | (2,1,2)                | 0.0028 | 0.0013 | -0.0023                         | 0.0293              | -0.079            | 0.0161                  |
| 45 | SSD     | ah               | 4          | (1,1,1)                | 0.0023 | 0.0010 | -0.0028                         | 0.0078              | -0.132            | <0.0001                 |
| 46 | SSD     | tdew             | 4          | (1,1,1)                | 0.0023 | 0.0010 | -0.0024                         | 0.0290              | -0.126            | 0.0002                  |
| 47 | SSD     | tmin             | 17         | (3,1,1)                | 0.0023 | 0.0010 | -0.0019                         | 0.0146              | -0.073            | 0.0296                  |
| 48 | STP     | tmin             | 15         | (1,1,2)                | 0.0027 | 0.0011 | -0.0047                         | <0.0001             | -0.071            | 0.0332                  |
| 49 | SWZ     | rh               | 23         | (2,1,5)                | 0.0011 | 0.0004 | 0.0004                          | 0.0377              | 0.166             | <0.0001                 |
| 50 | SYC     | tdew             | 23         | (3,1,3)                | 0.0026 | 0.0012 | -0.0015                         | 0.0497              | -0.283            | <0.0001                 |
| 51 | SYC     | tmax             | 3          | (5,1,4)                | 0.0025 | 0.0011 | -0.0028                         | 0.0163              | -0.247            | <0.0001                 |
| 52 | SYC     | tmin             | 16         | (3,1,3)                | 0.0026 | 0.0012 | -0.0030                         | 0.0116              | -0.245            | <0.0001                 |
| 53 | SYC     | tmoy             | 17         | (3,1,3)                | 0.0026 | 0.0012 | -0.0027                         | 0.0347              | -0.245            | <0.0001                 |
| 54 | TGO     | ah               | 5          | (1,1,2)                | 0.0015 | 0.0006 | -0.0011                         | 0.0206              | -0.271            | <0.0001                 |
| 55 | TGO     | rh               | 8          | (1,1,2)                | 0.0015 | 0.0006 | -0.0010                         | 0.0299              | -0.164            | <0.0001                 |
| 56 | TGO     | tdew             | 5          | (1,1,2)                | 0.0015 | 0.0006 | -0.0012                         | 0.0220              | -0.272            | <0.0001                 |
| 57 | TUN     | rh               | 9          | (2,1,2)                | 0.0016 | 0.0007 | -0.0008                         | 0.0275              | -0.086            | 0.0088                  |
| 58 | ZAF     | ah               | 5          | (2,1,5)                | 0.0005 | 0.0002 | 0.0003                          | 0.0111              | 0.093             | 0.0043                  |
| 59 | ZAF     | insol            | 7          | (1,1,3)                | 0.0005 | 0.0002 | -0.0003                         | 0.0028              | -0.086            | 0.0086                  |

*NRMSE: Normalized root mean square error – NMAE: normalized mean absolute error.*

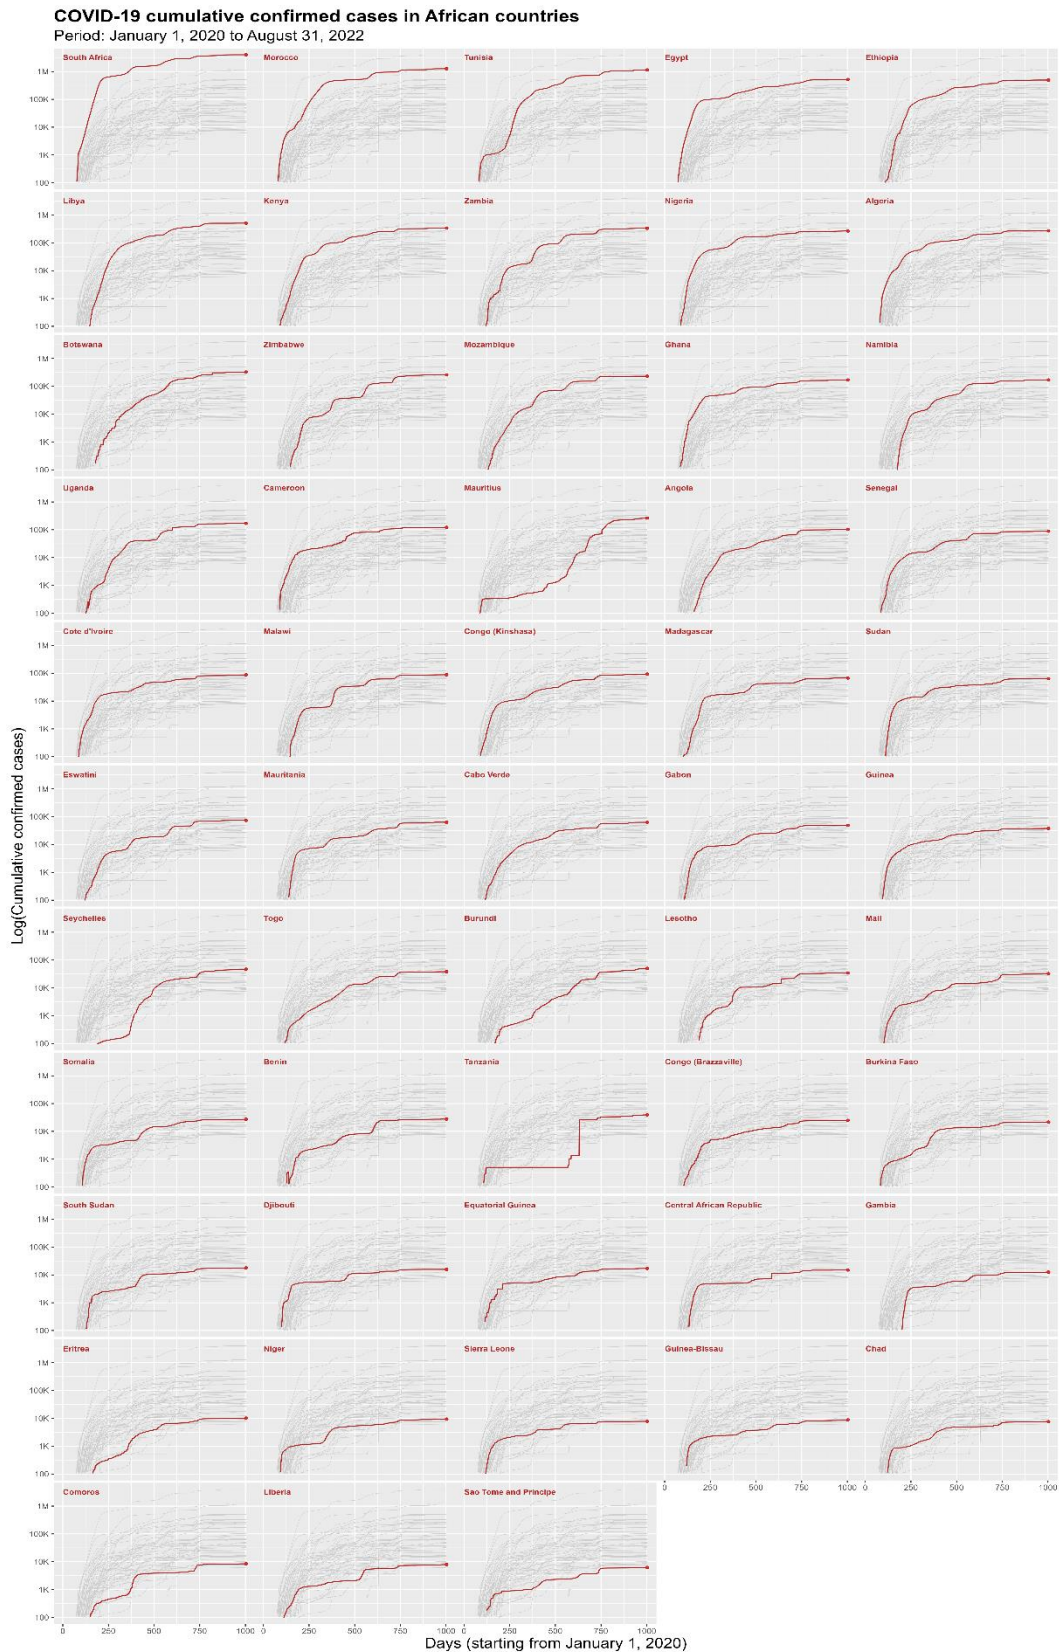

**Figure S1.** Individual COVID-19 cumulative cases in African countries. Counts of cumulative cases is expressed on log scale (vertical axis). The countries are sorted in decreasing order of incidence. This figure is adapted from Kieran Healy's *COVID-19 small multiple* (see <https://kieranhealy.org/blog/archives/2020/03/27/a-covid-small-multiple/>)



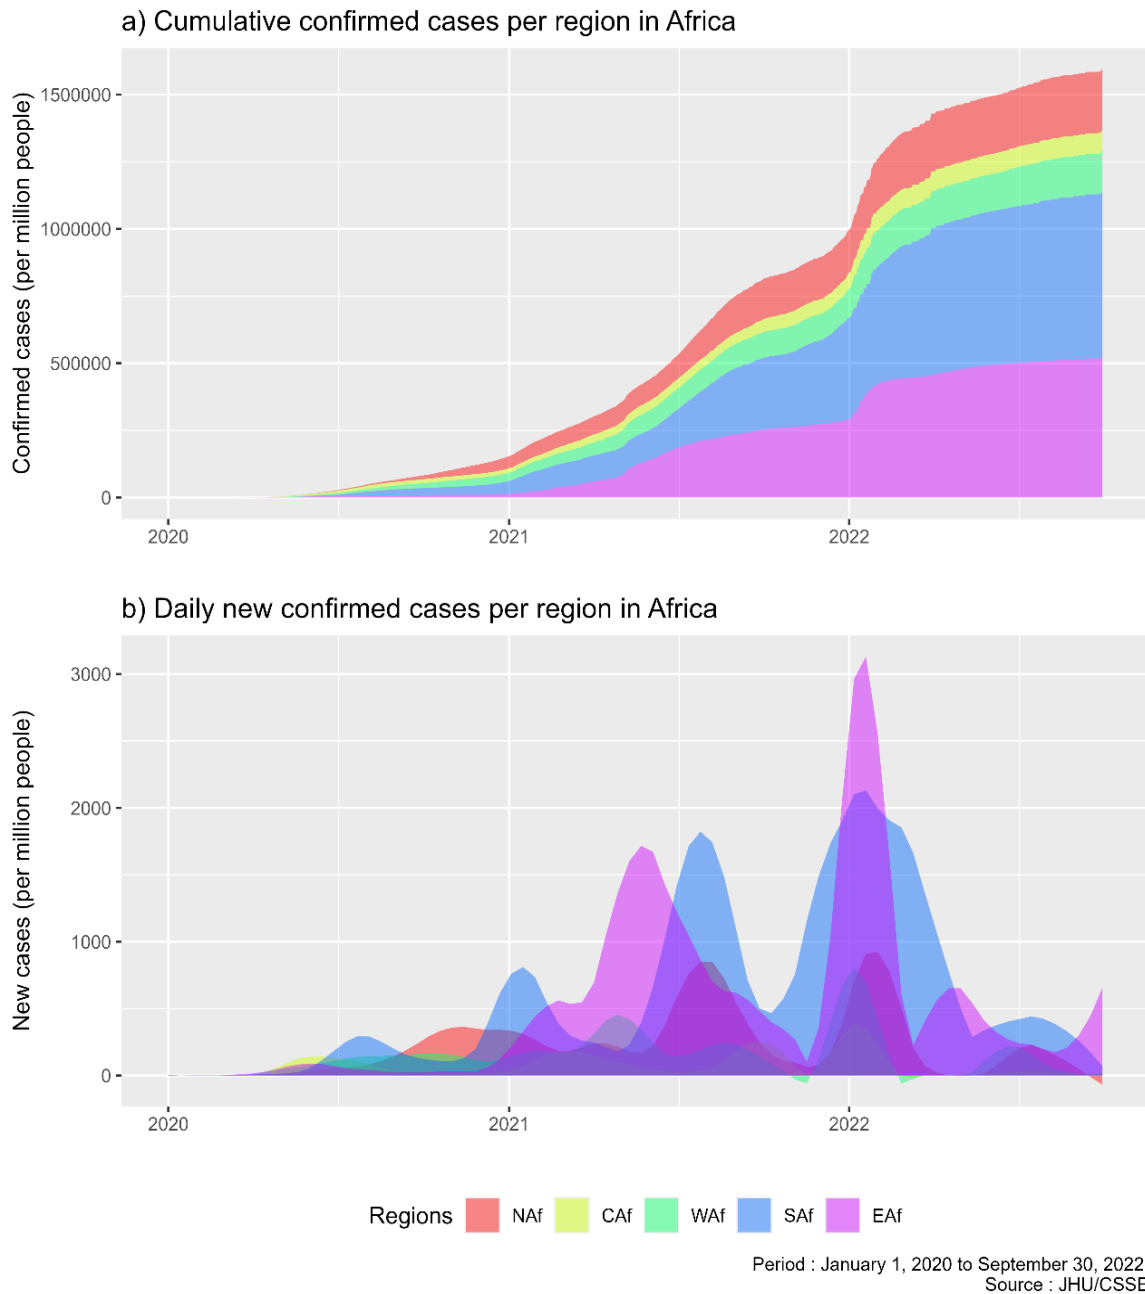

**Figure S2.** Evolution of the COVID-19 confirmed cases in Africa. (a) Cumulative confirmed cases per million people. (b) New daily confirmed cases per million people.

*Plots of Autocorrelation function (ACF) for all countries and climate variables. Plots are sorted by countries names alphabetic order.*

### 1) Algeria (DZA)

ACF plots for weather variables from January 1, 2020 to September 30, 2022

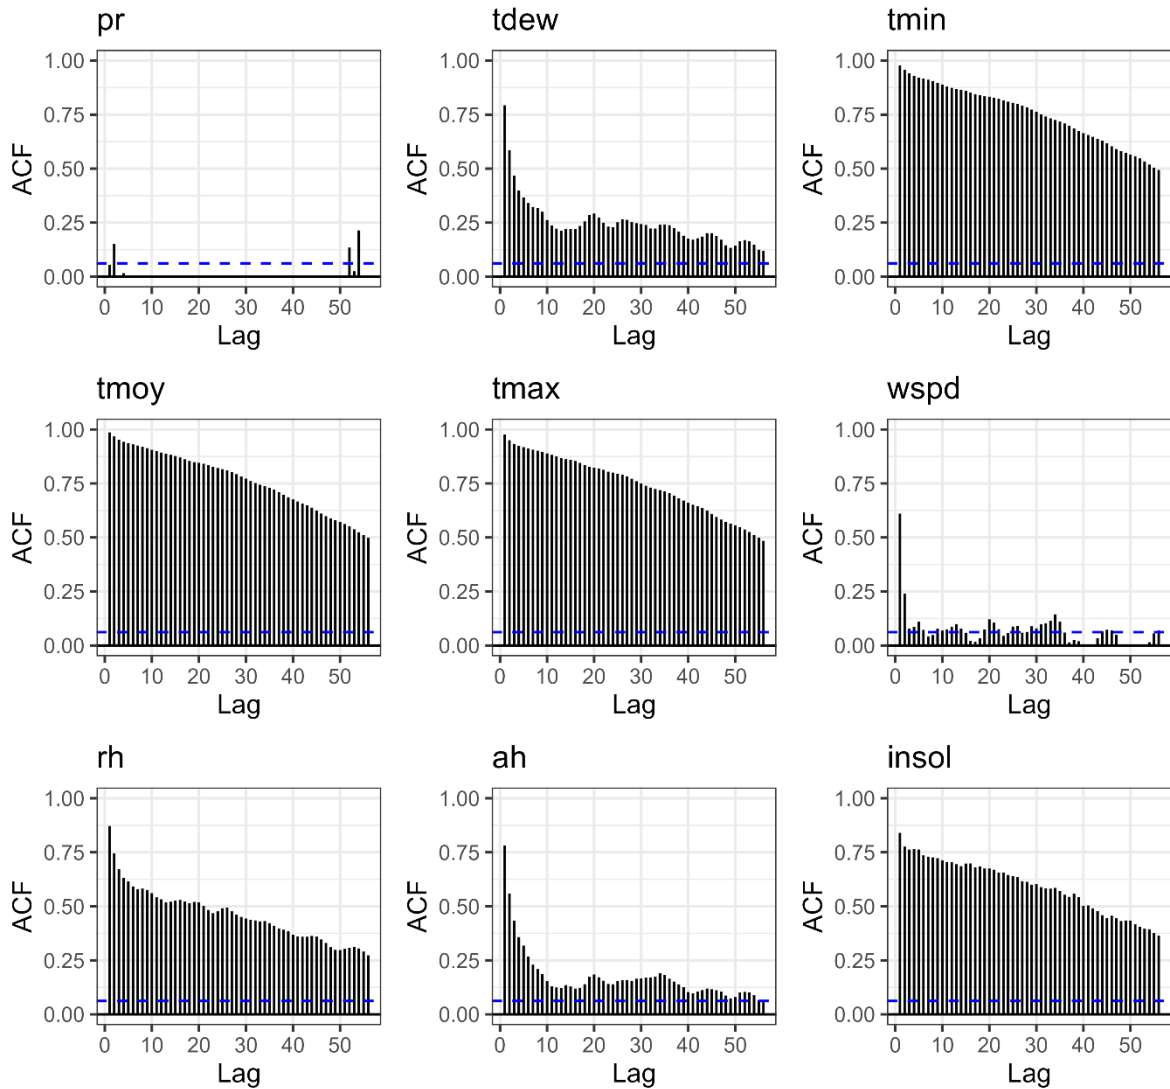

## 2) Angola (AGO)

ACF plots for weather variables from January 1, 2020 to September 30, 2022

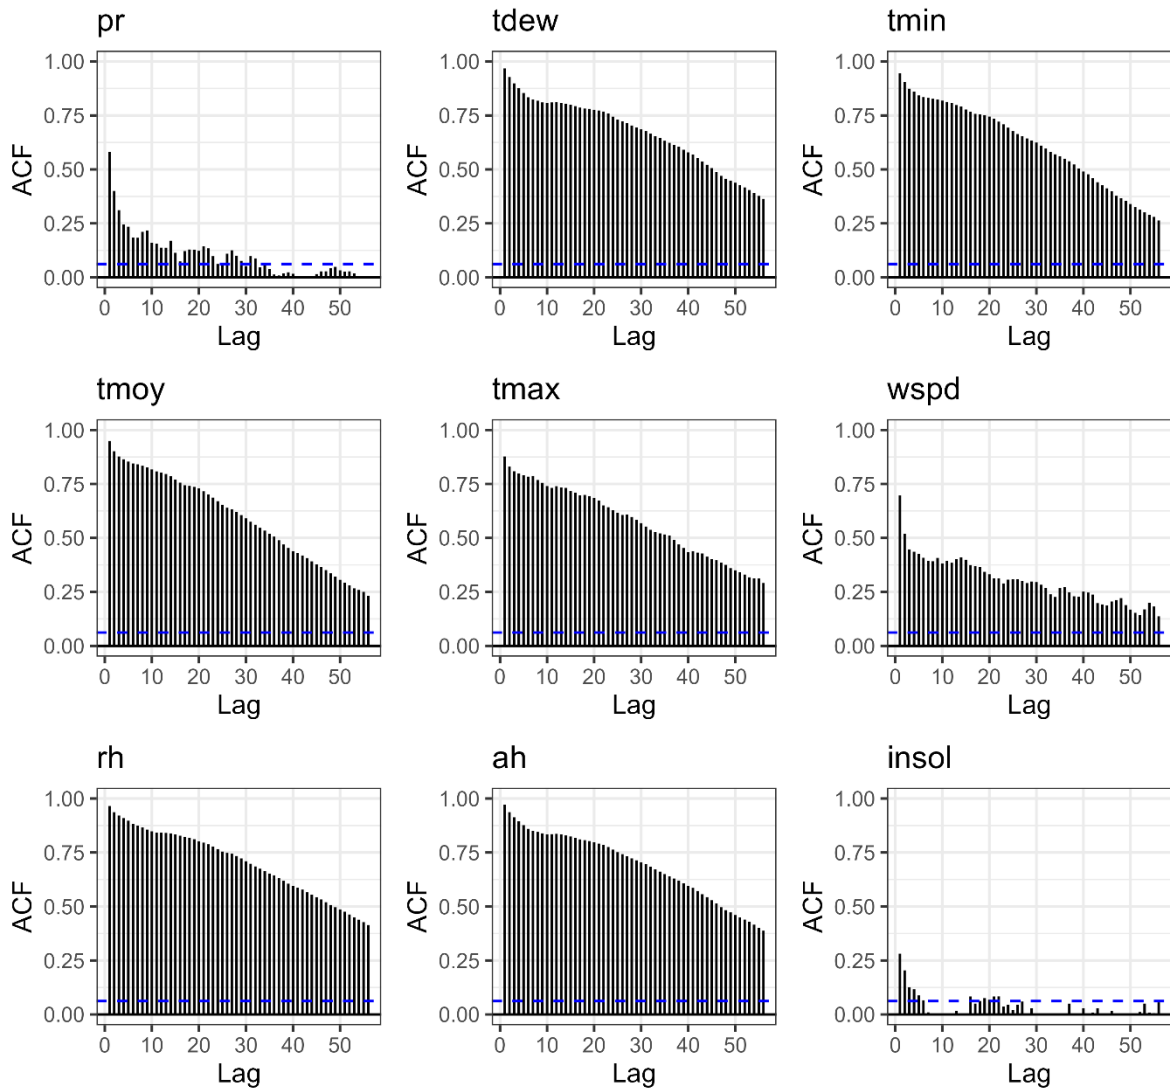

### 3) Benin (BEN)

ACF plots for weather variables from January 1, 2020 to September 30, 2022

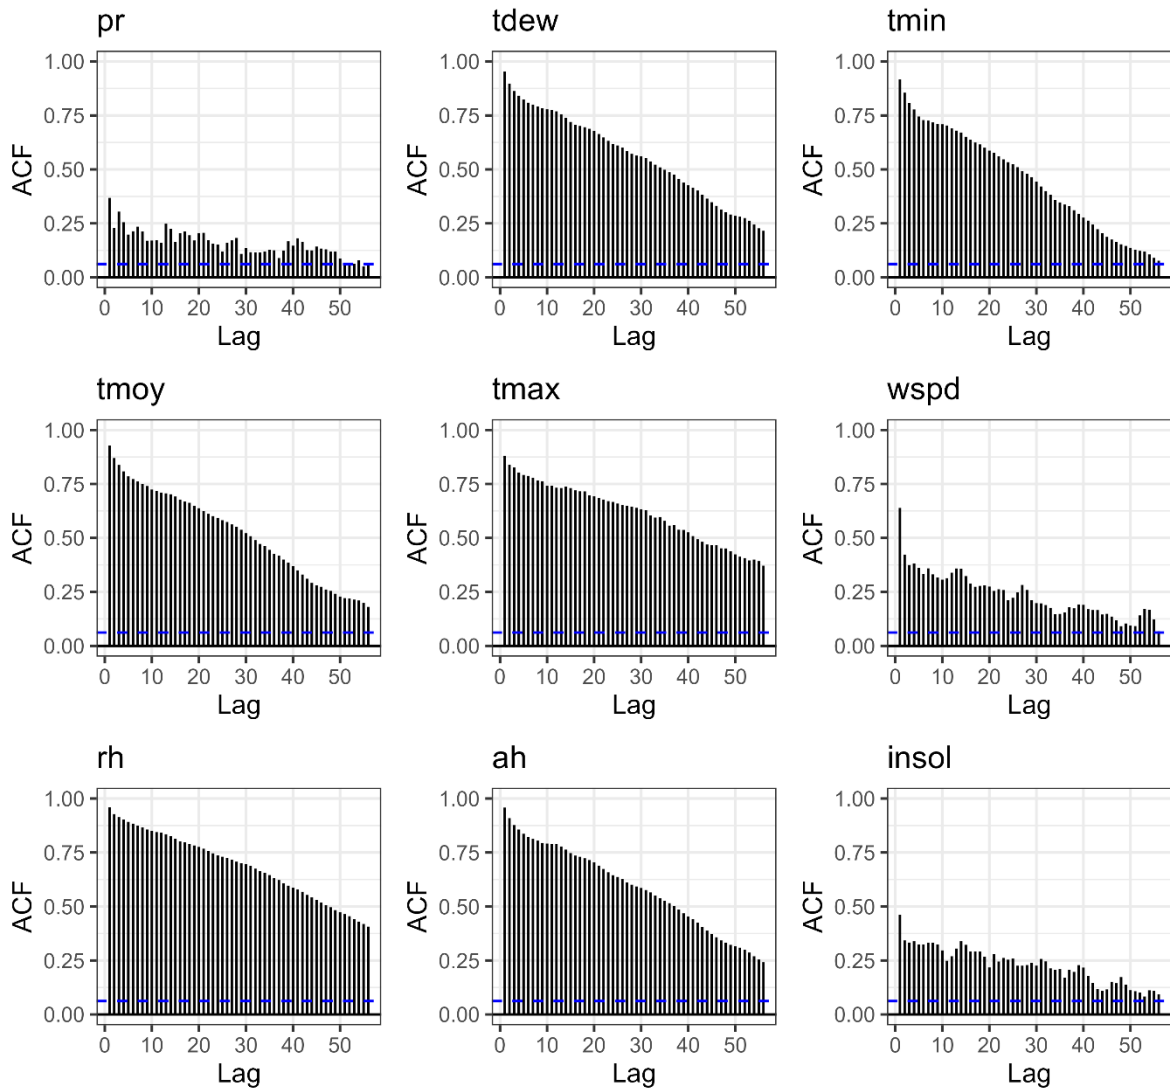

#### 4) Botswana (BWA)

ACF plots for weather variables from January 1, 2020 to September 30, 2022

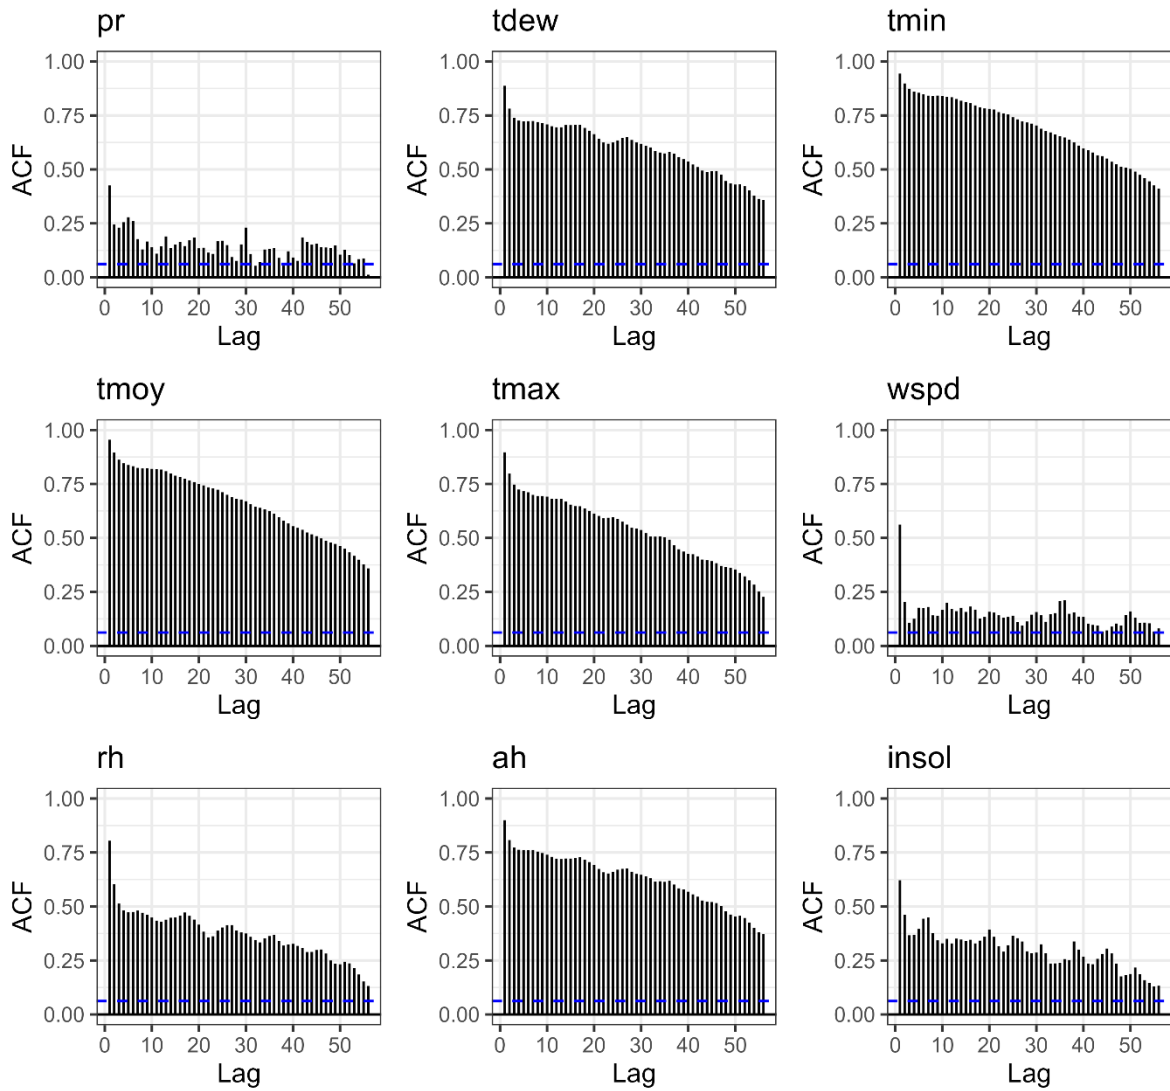

### 5) Burkina Faso (BFA)

ACF plots for weather variables from January 1, 2020 to September 30, 2022

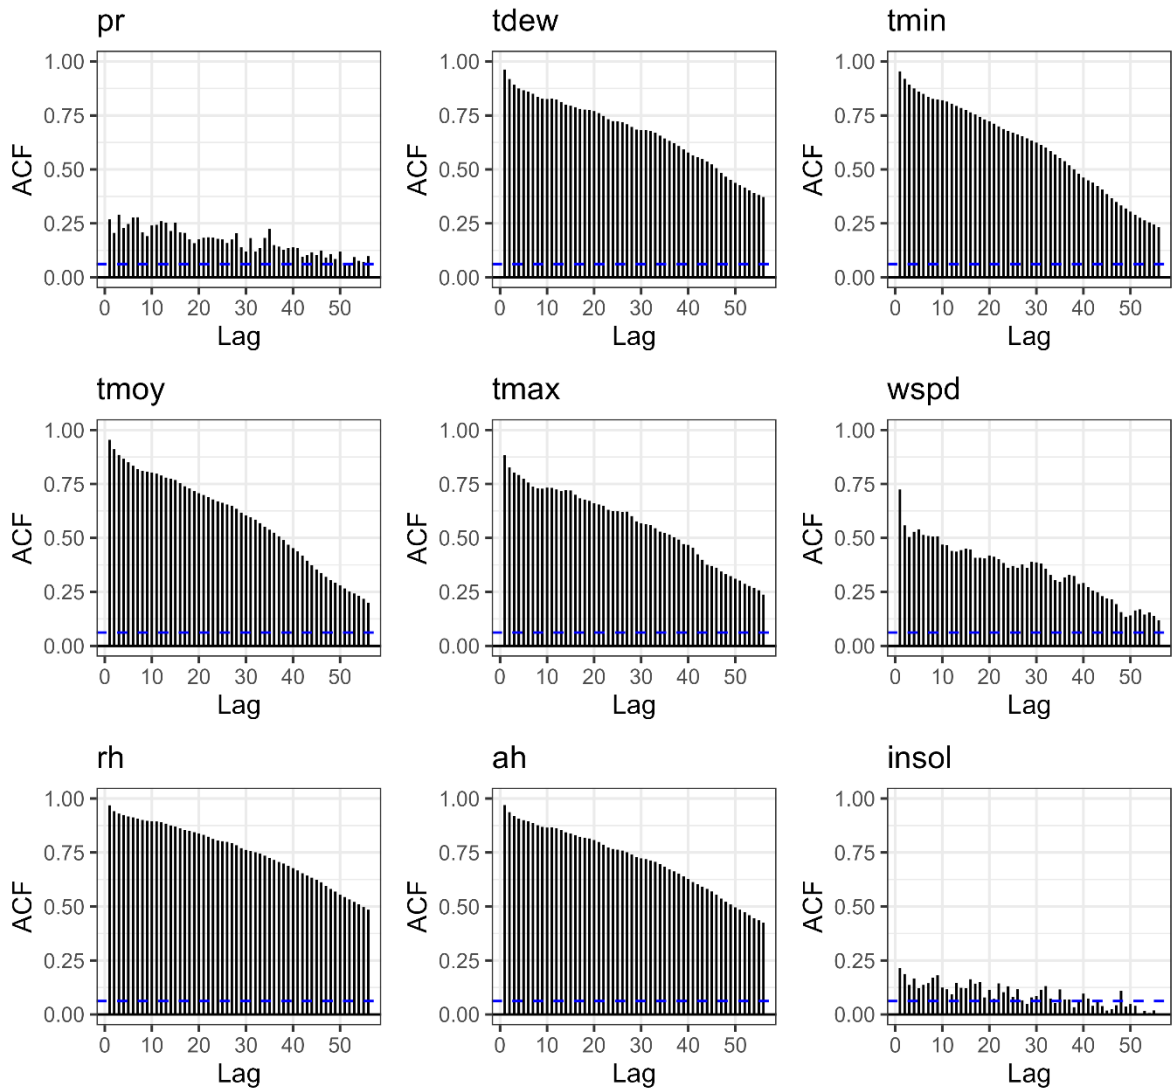

## 6) Burundi (BDI)

ACF plots for weather variables from January 1, 2020 to September 30, 2022

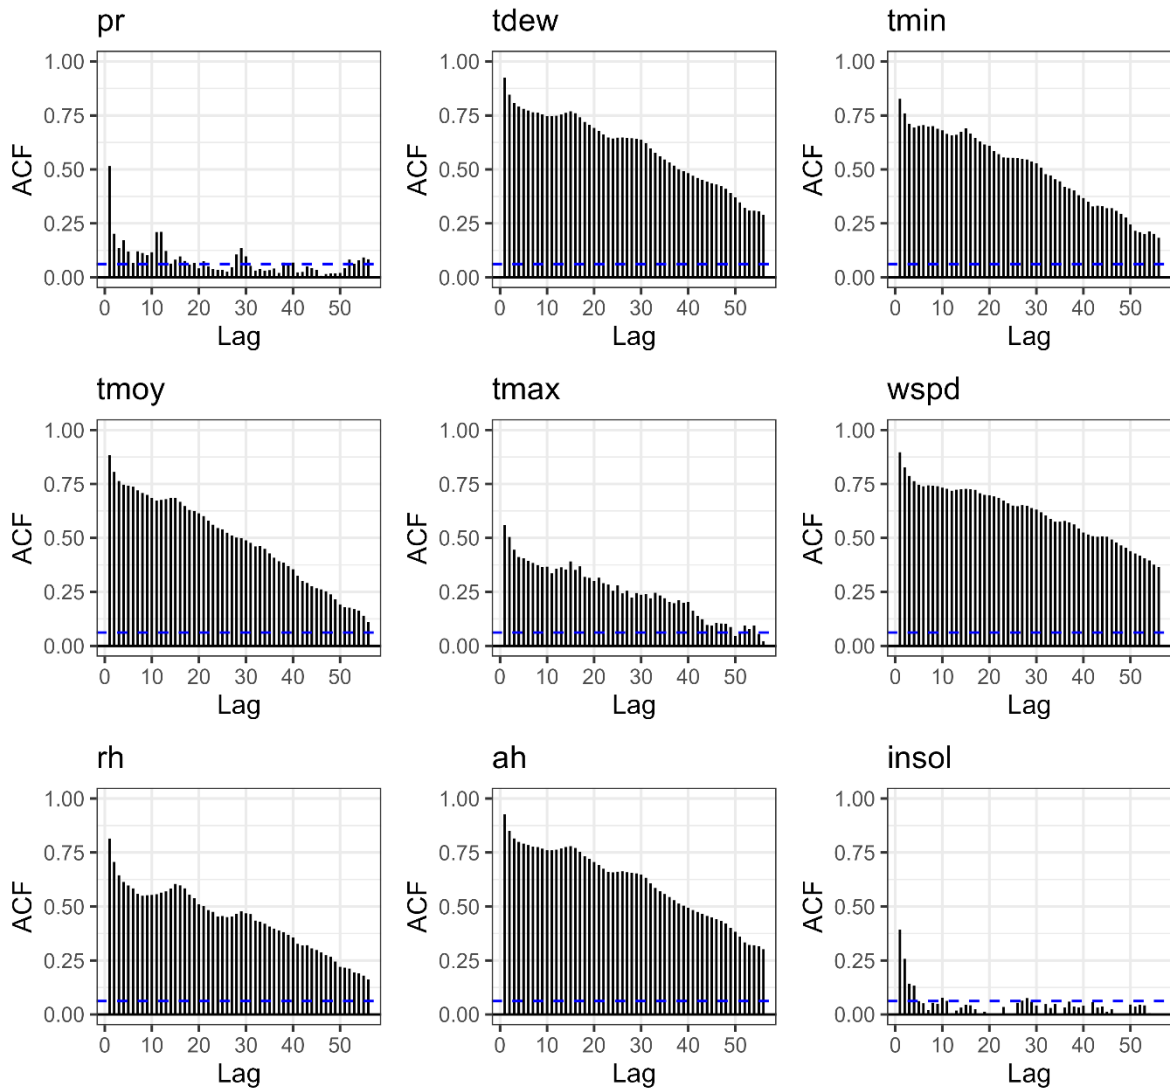

## 7) Cabo Verde (CPV)

ACF plots for weather variables from January 1, 2020 to September 30, 2022

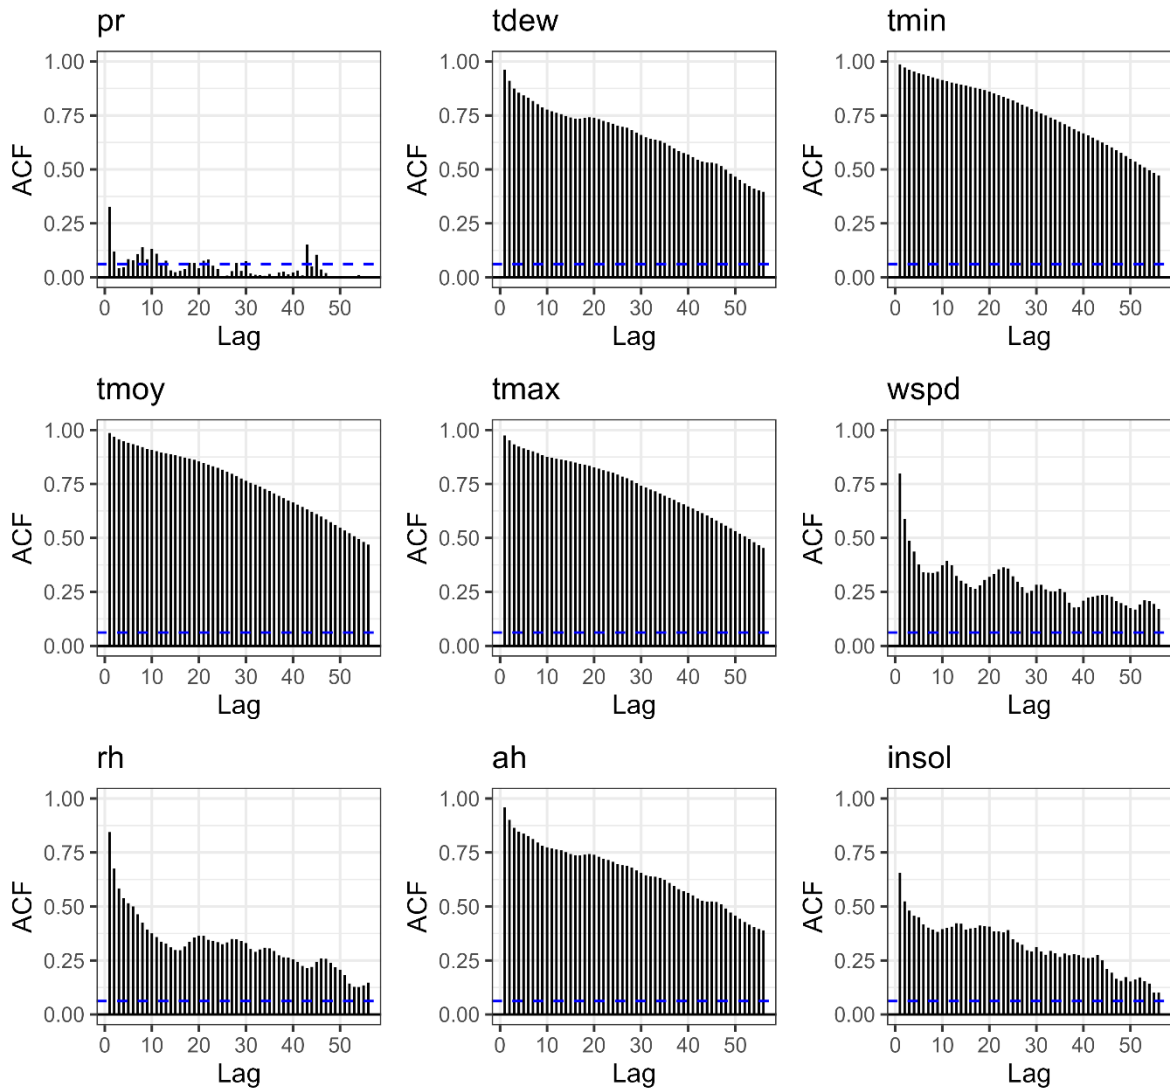



## 8) Cameroon (CMR)

ACF plots for weather variables from January 1, 2020 to September 30, 2022

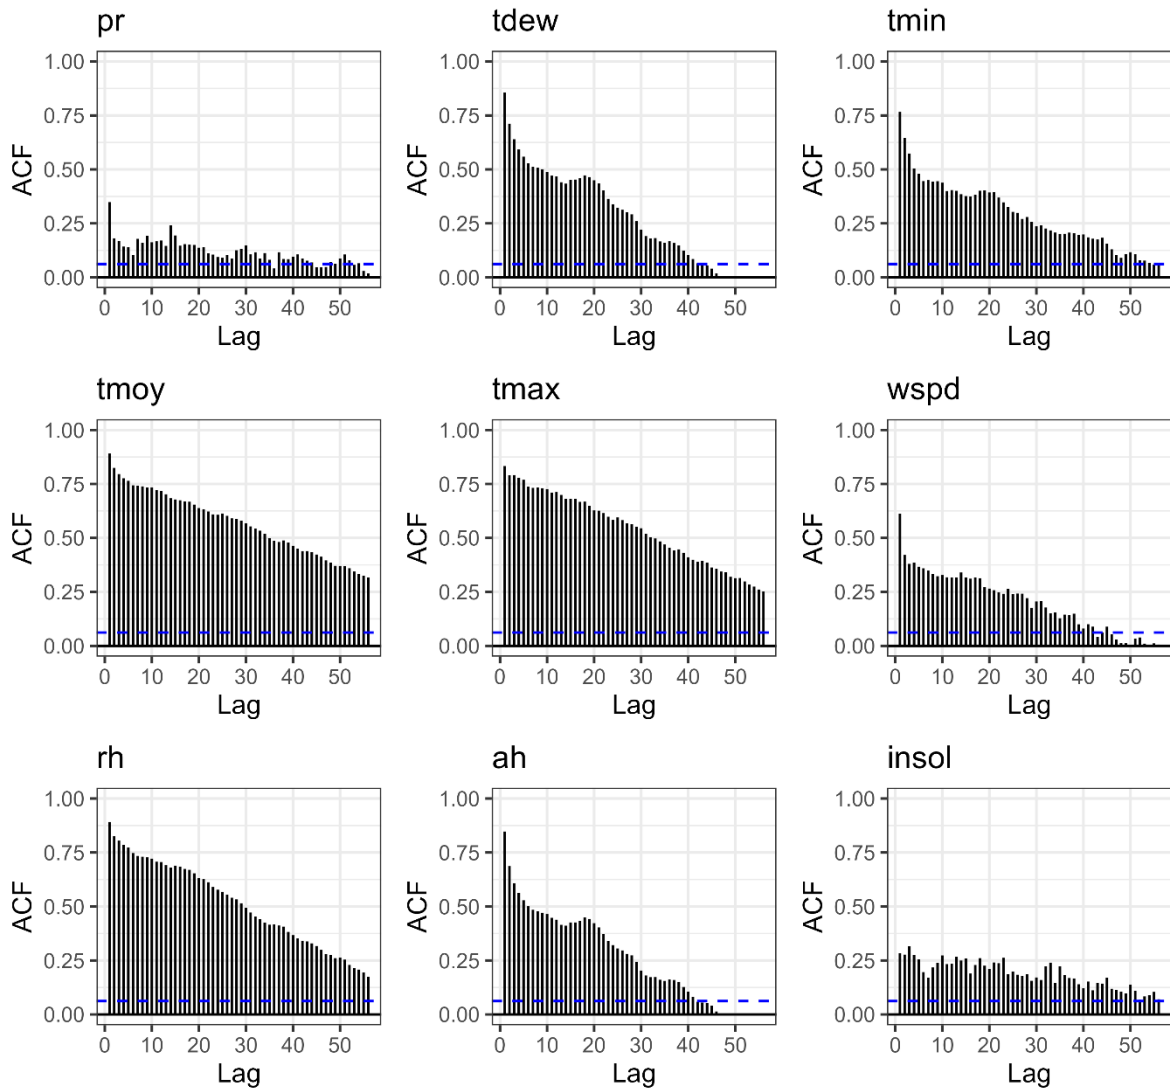

### 9) Central African Republic (CAF)

ACF plots for weather variables from January 1, 2020 to September 30, 2022

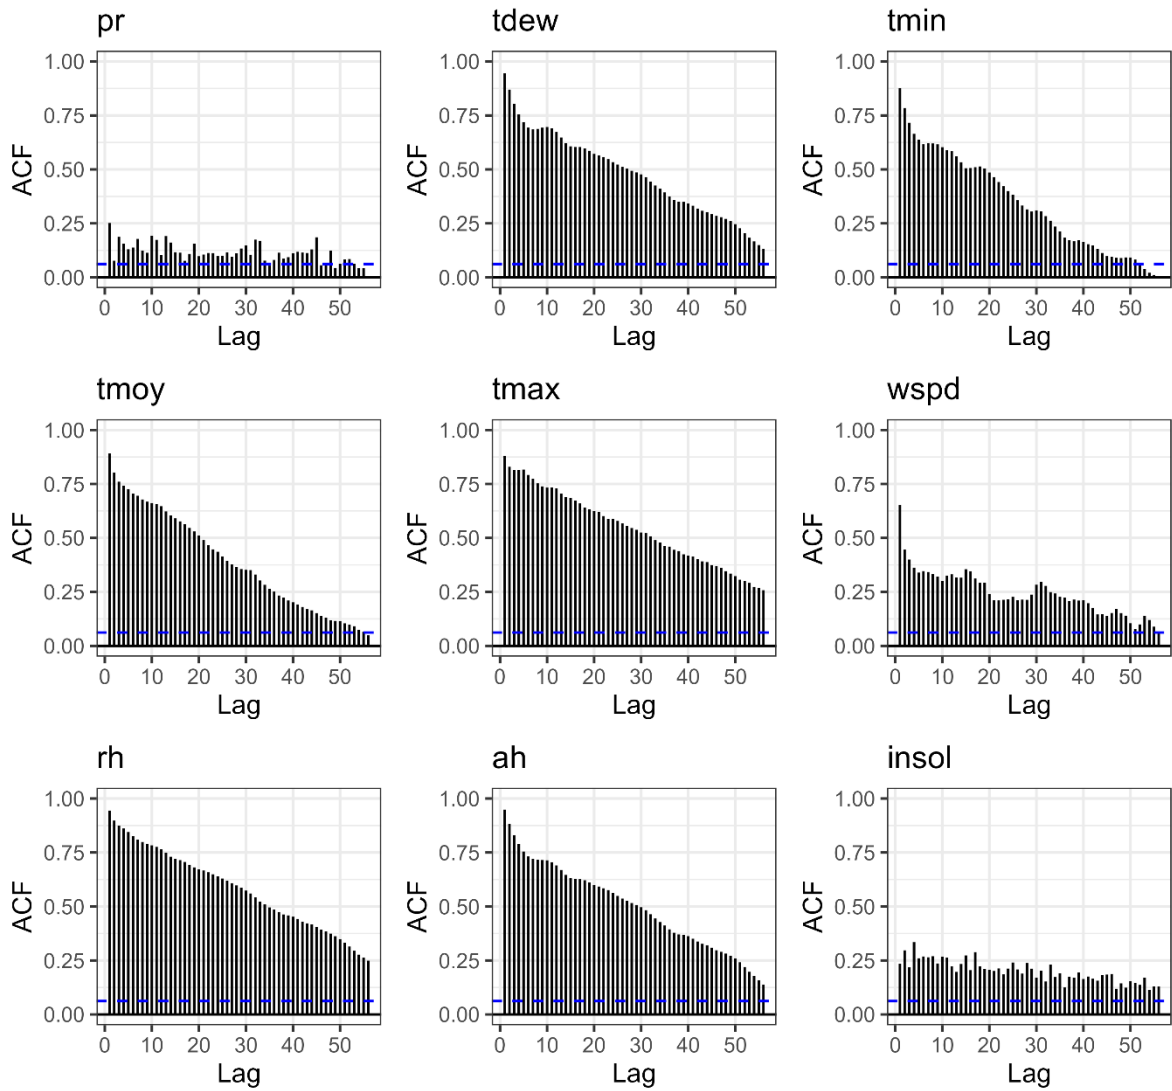

## 10) Chad (TCD)

ACF plots for weather variables from January 1, 2020 to September 30, 2022

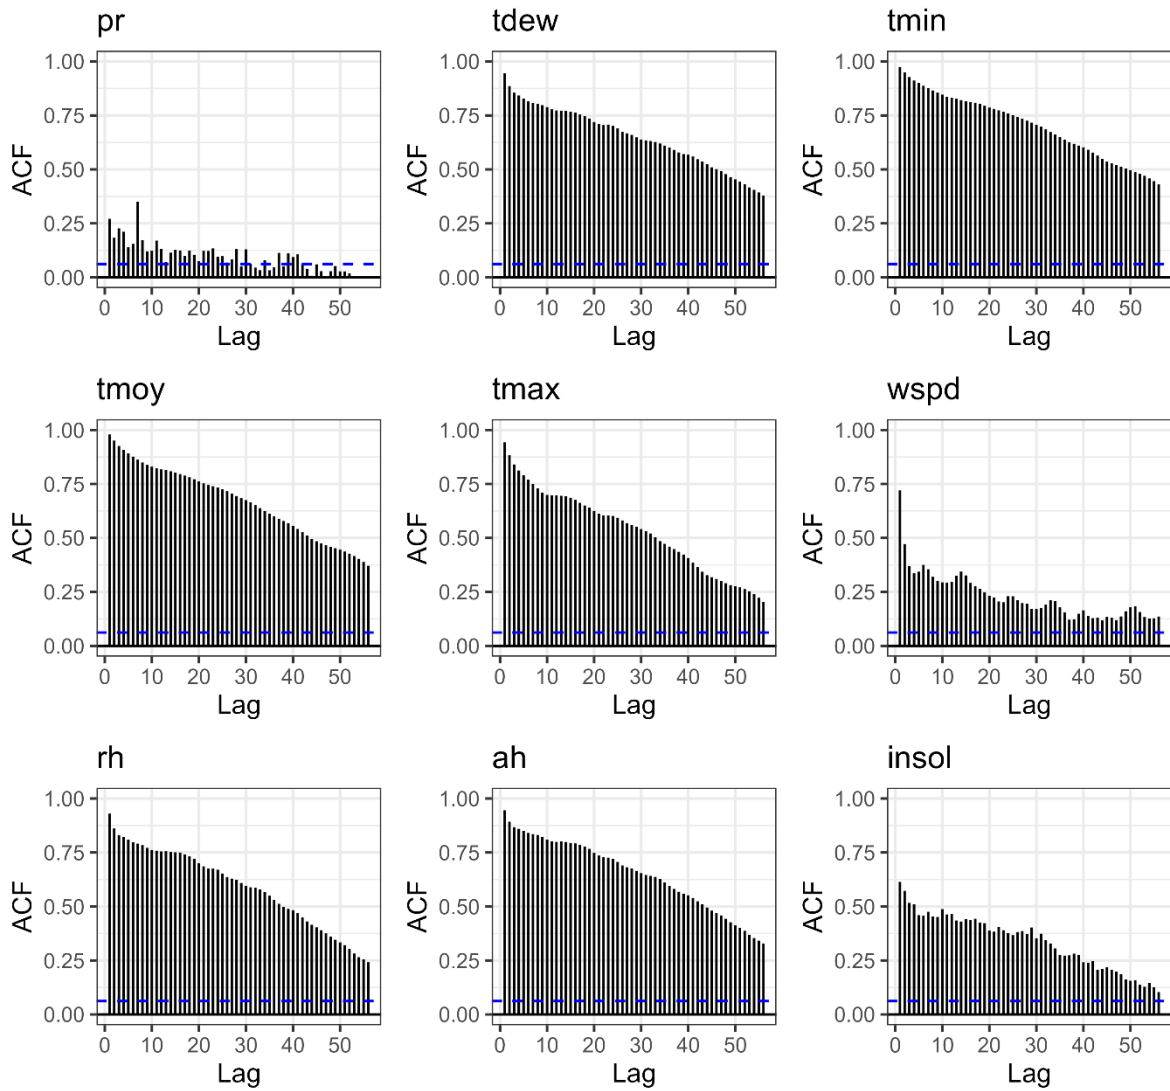

## 11) Comoros (COM)

ACF plots for weather variables from January 1, 2020 to September 30, 2022

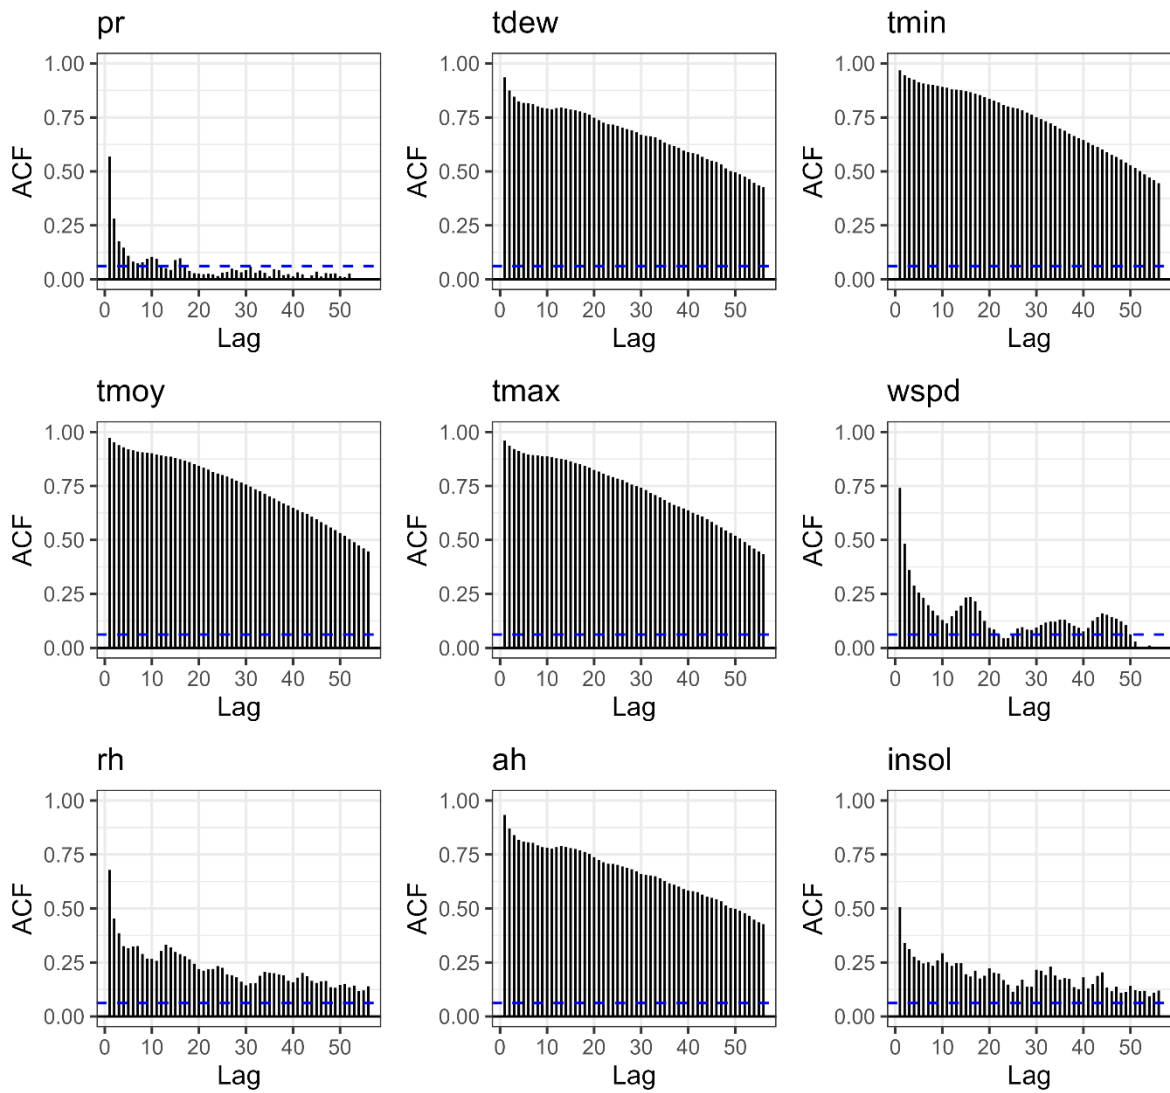

## 12) Congo (Brazzaville) (COG)

ACF plots for weather variables from January 1, 2020 to September 30, 2022

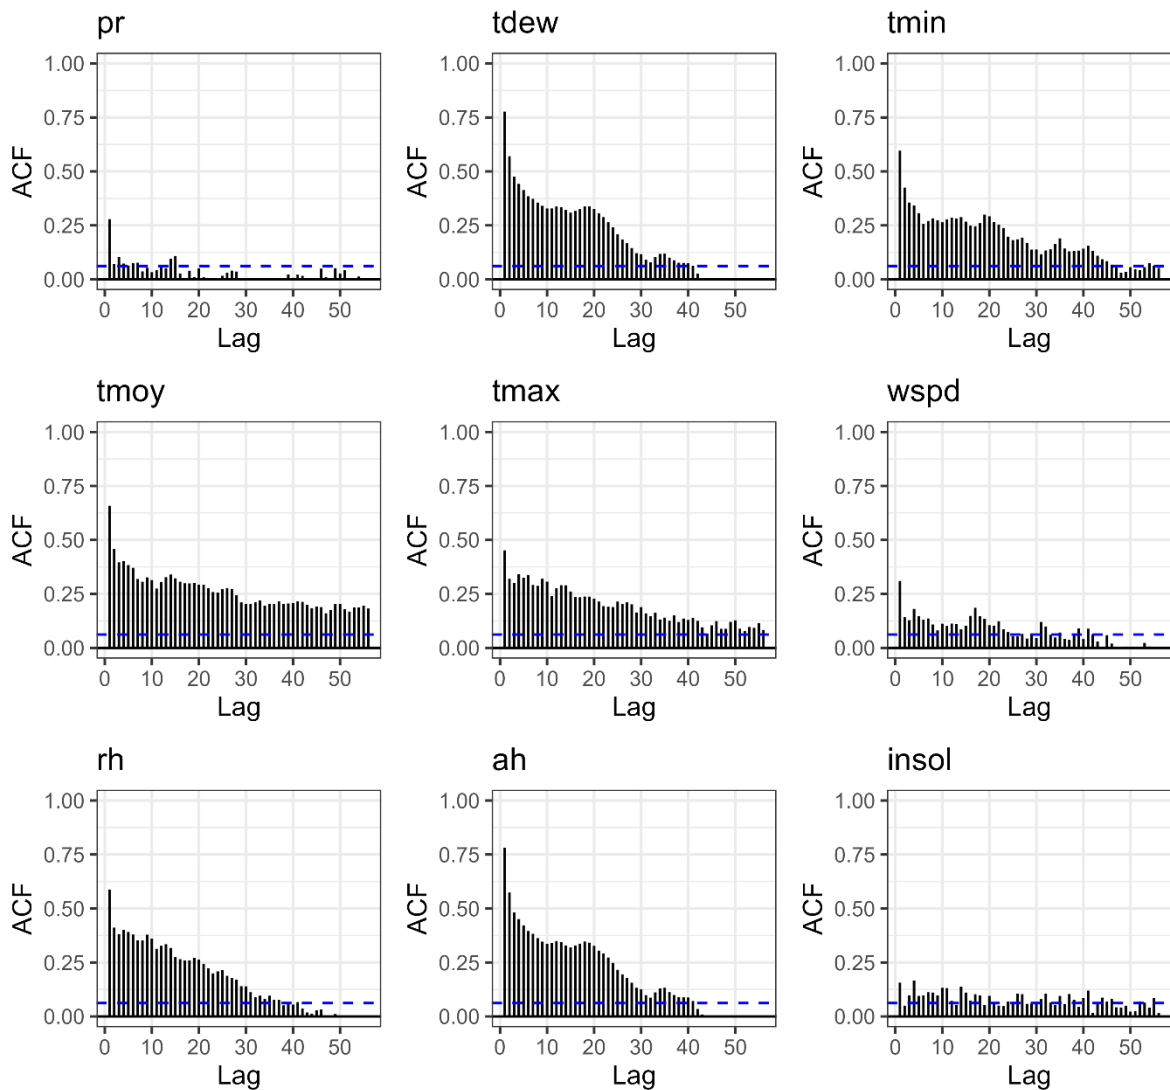

### 13 Congo (Kinshasa) (COD)

ACF plots for weather variables from January 1, 2020 to September 30, 2022

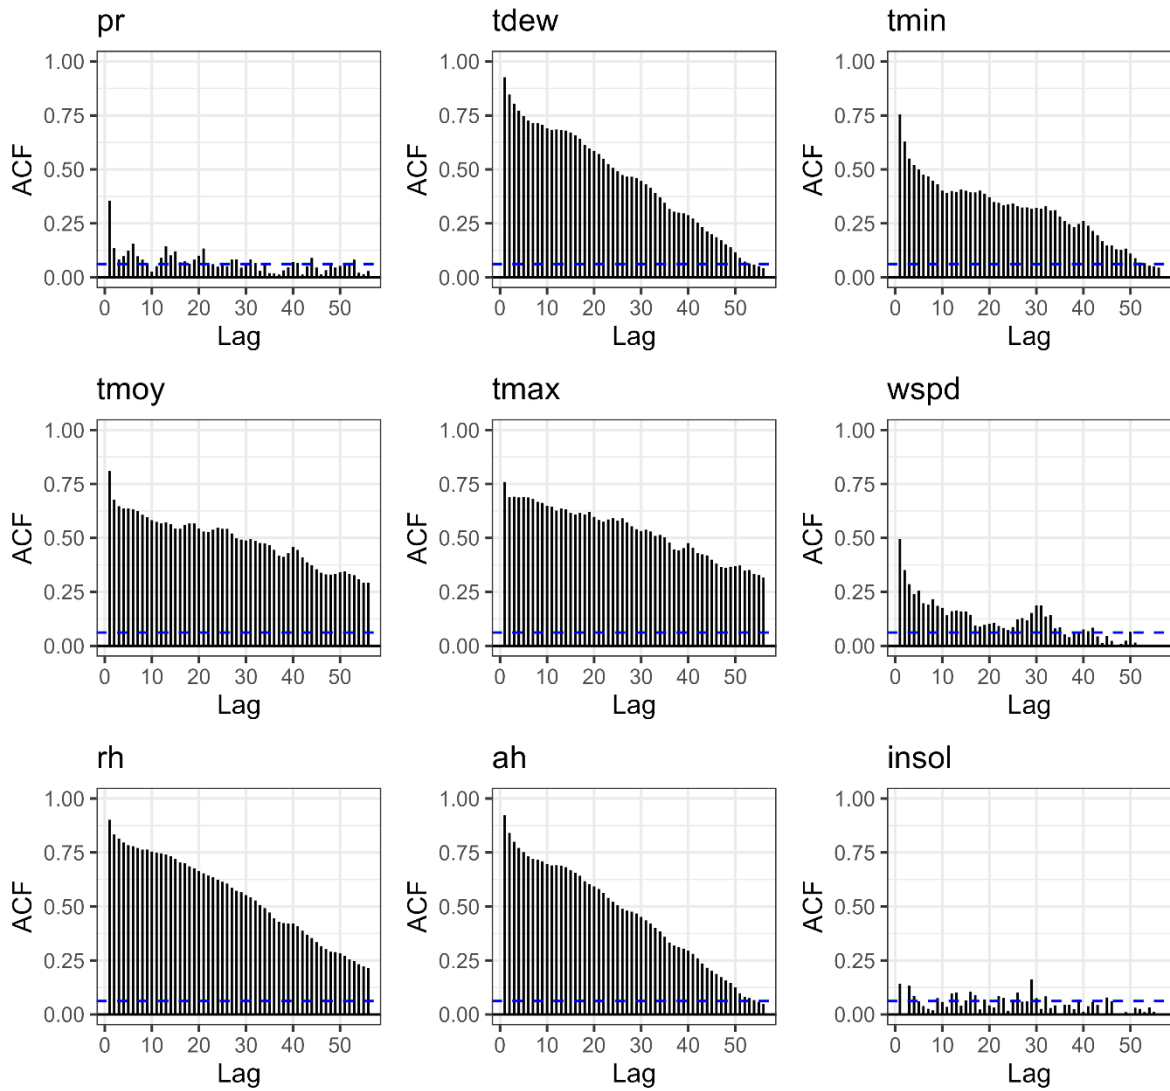

## 14) Cote d'Ivoire (CIV)

ACF plots for weather variables from January 1, 2020 to September 30, 2022

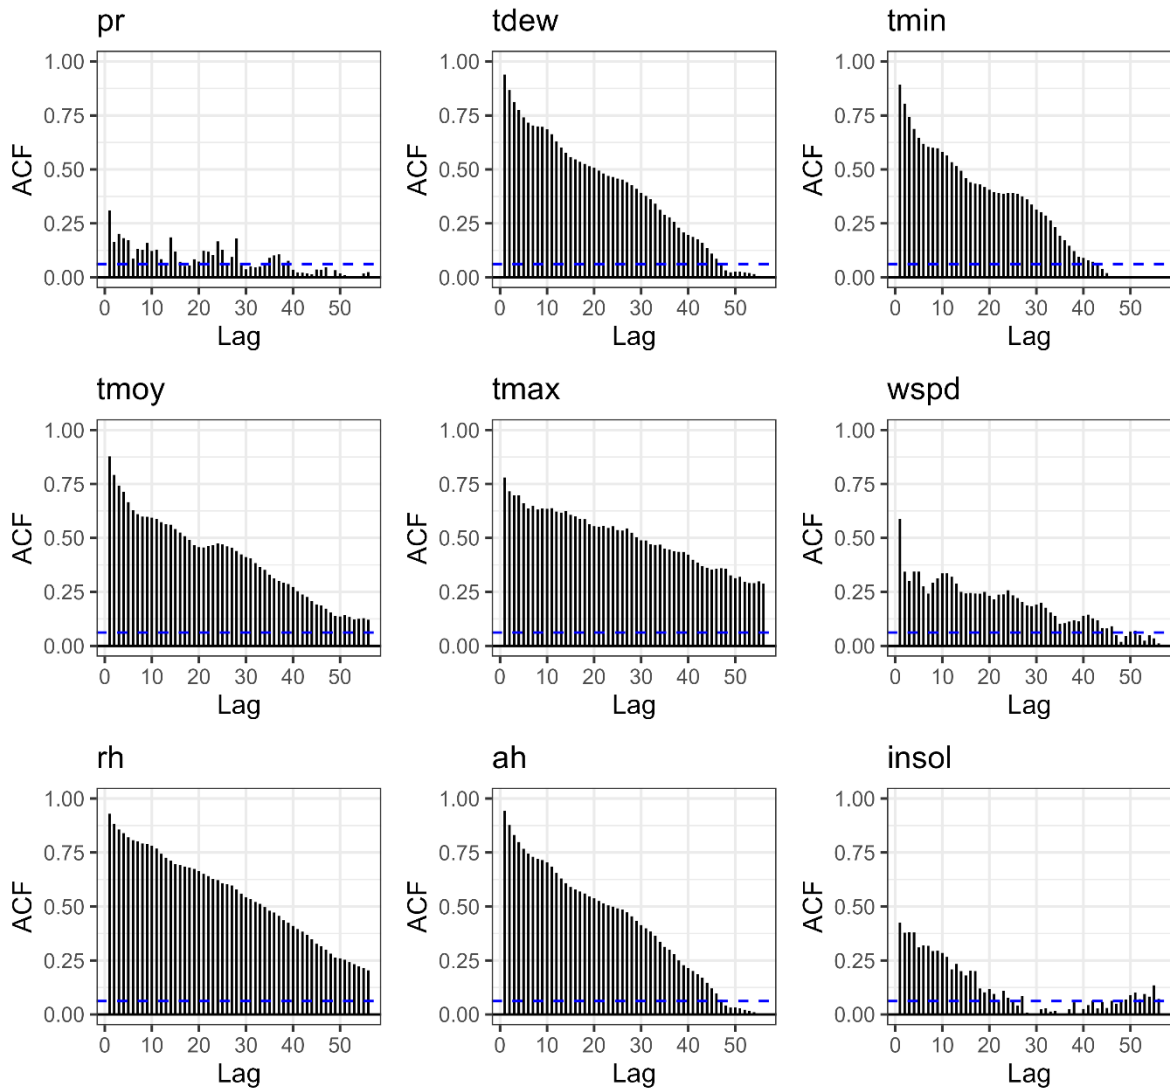

### 15) Djibouti (DJI)

ACF plots for weather variables from January 1, 2020 to September 30, 2022

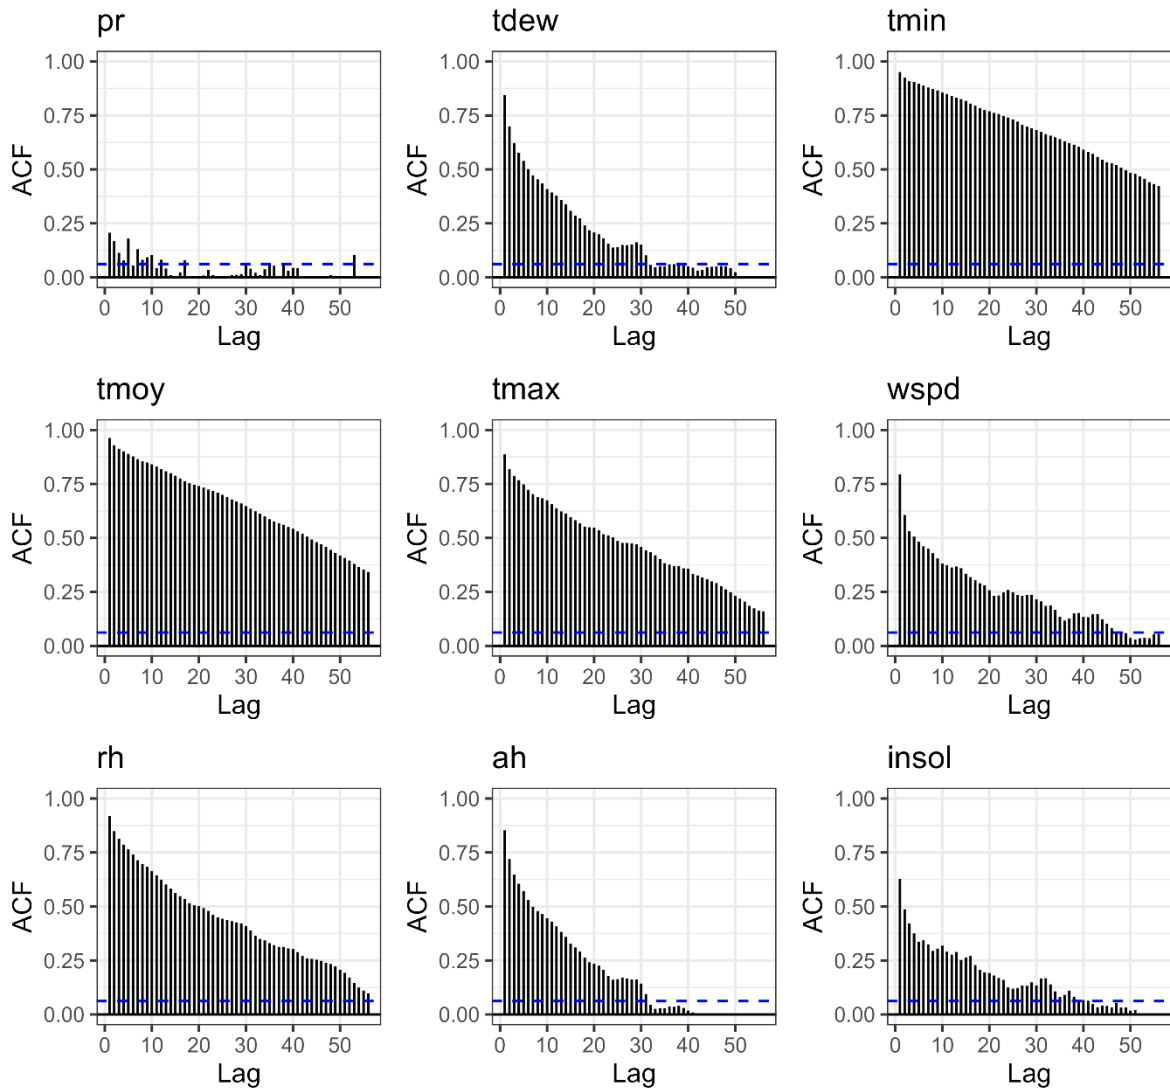



## 16) Egypt (EGY)

ACF plots for weather variables from January 1, 2020 to September 30, 2022

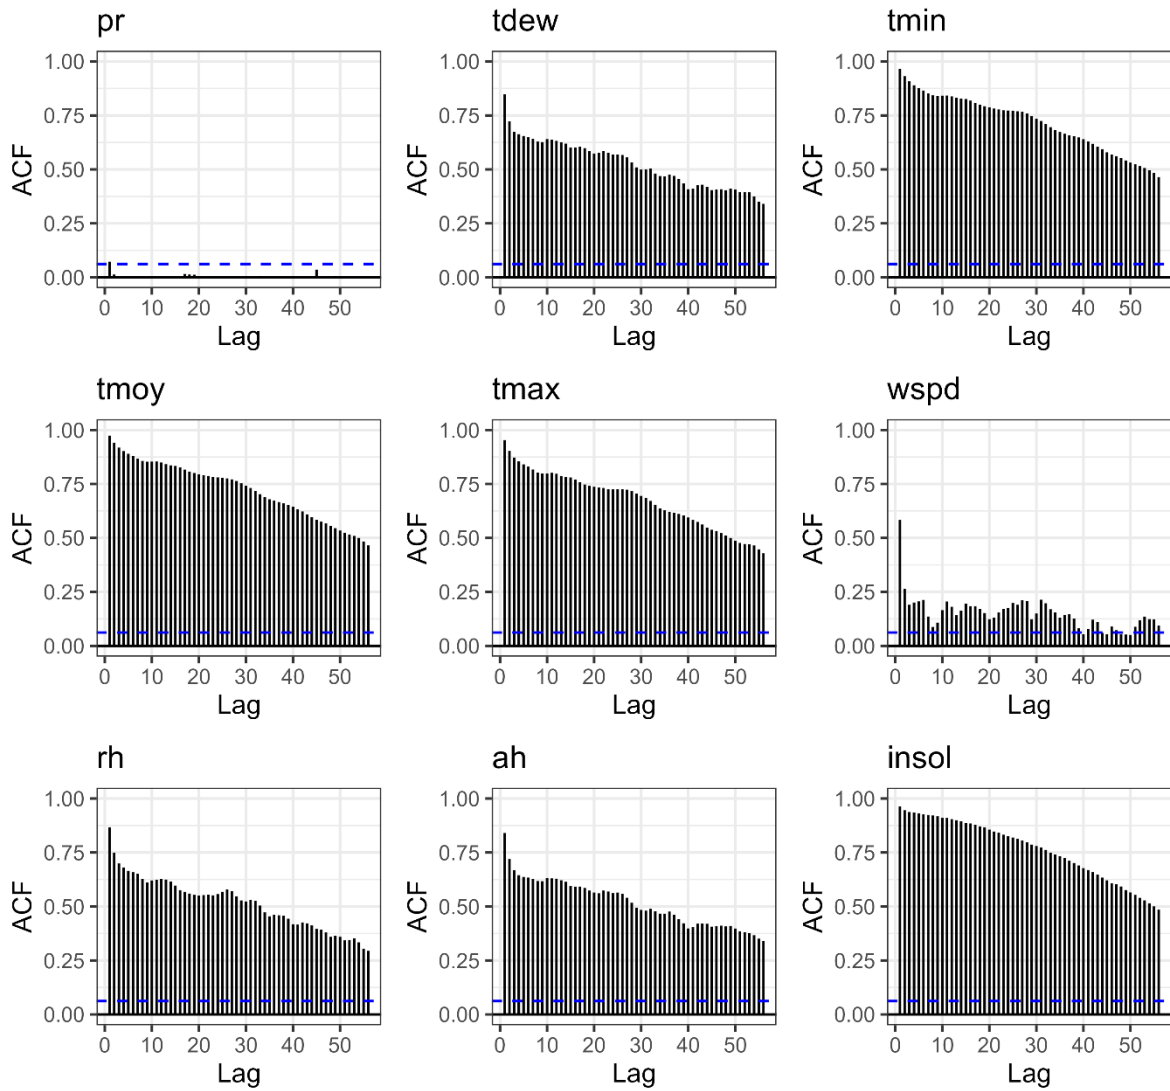

## 17) Equatorial Guinea (GNQ)

ACF plots for weather variables from January 1, 2020 to September 30, 2022

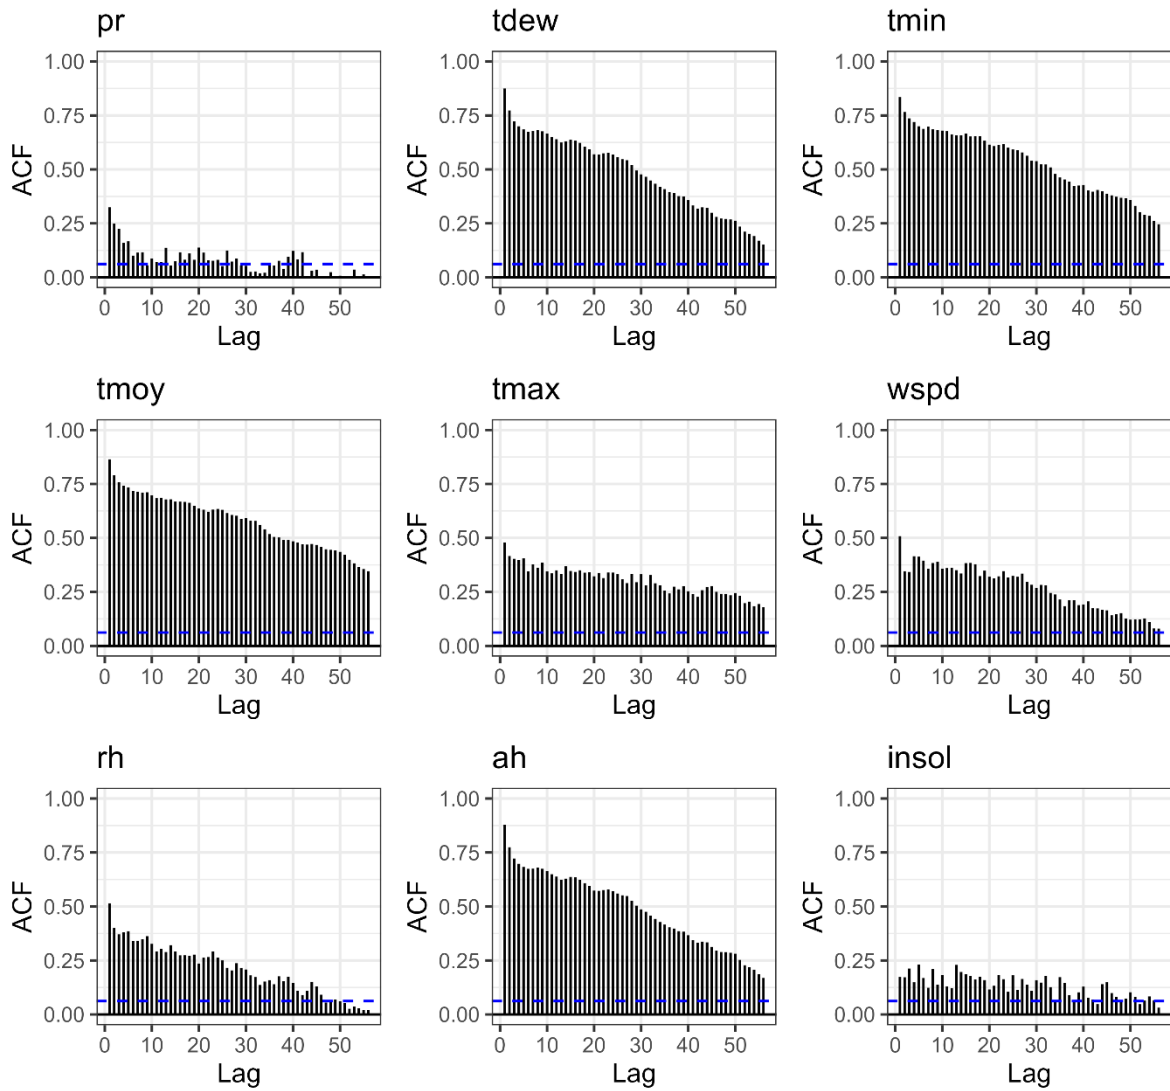

## 18) Eritrea (ERI)

ACF plots for weather variables from January 1, 2020 to September 30, 2022

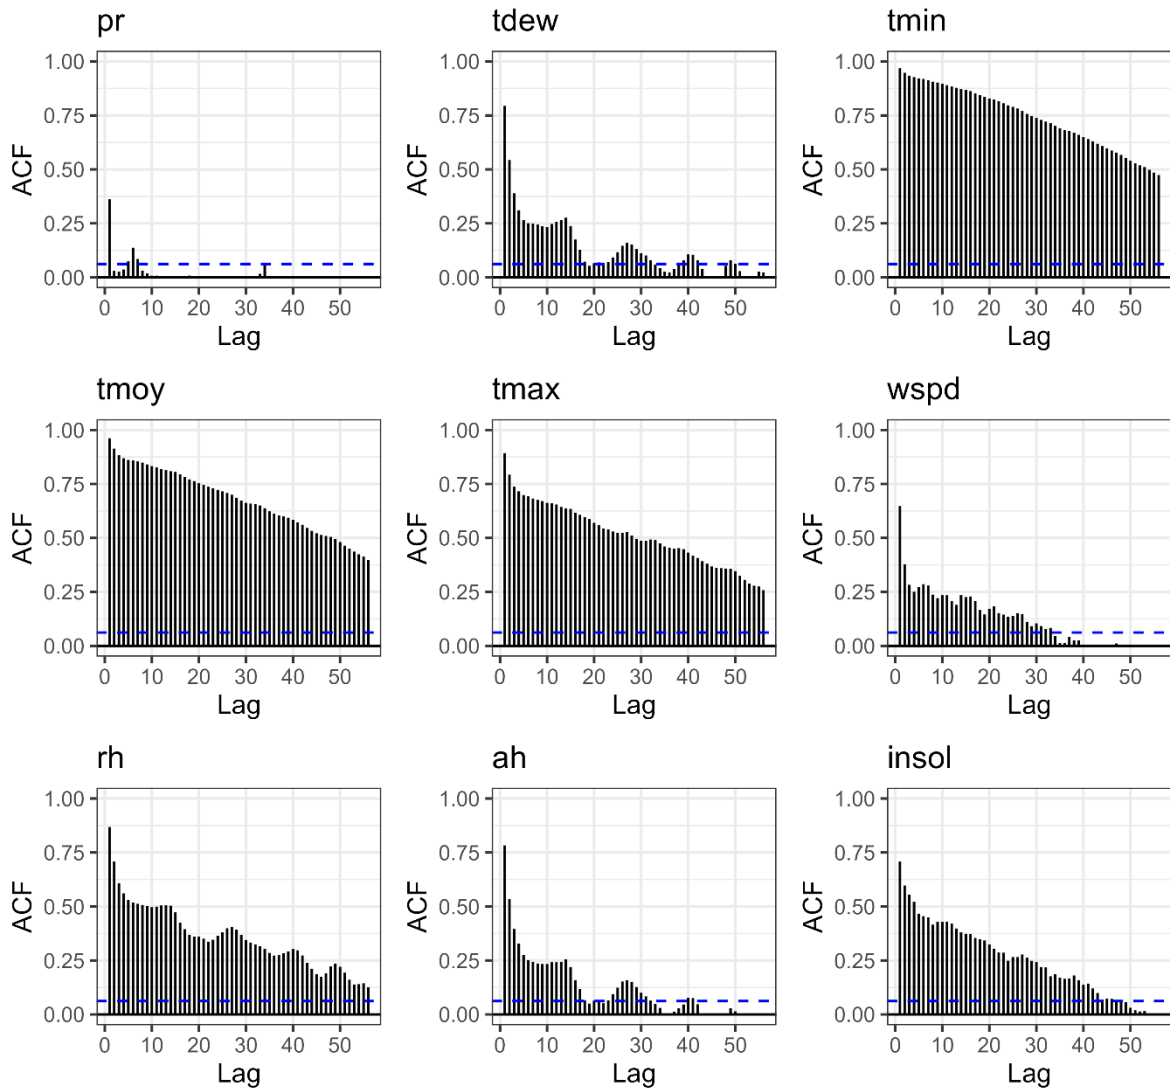

## 19) Eswatini (SWZ)

ACF plots for weather variables from January 1, 2020 to September 30, 2022

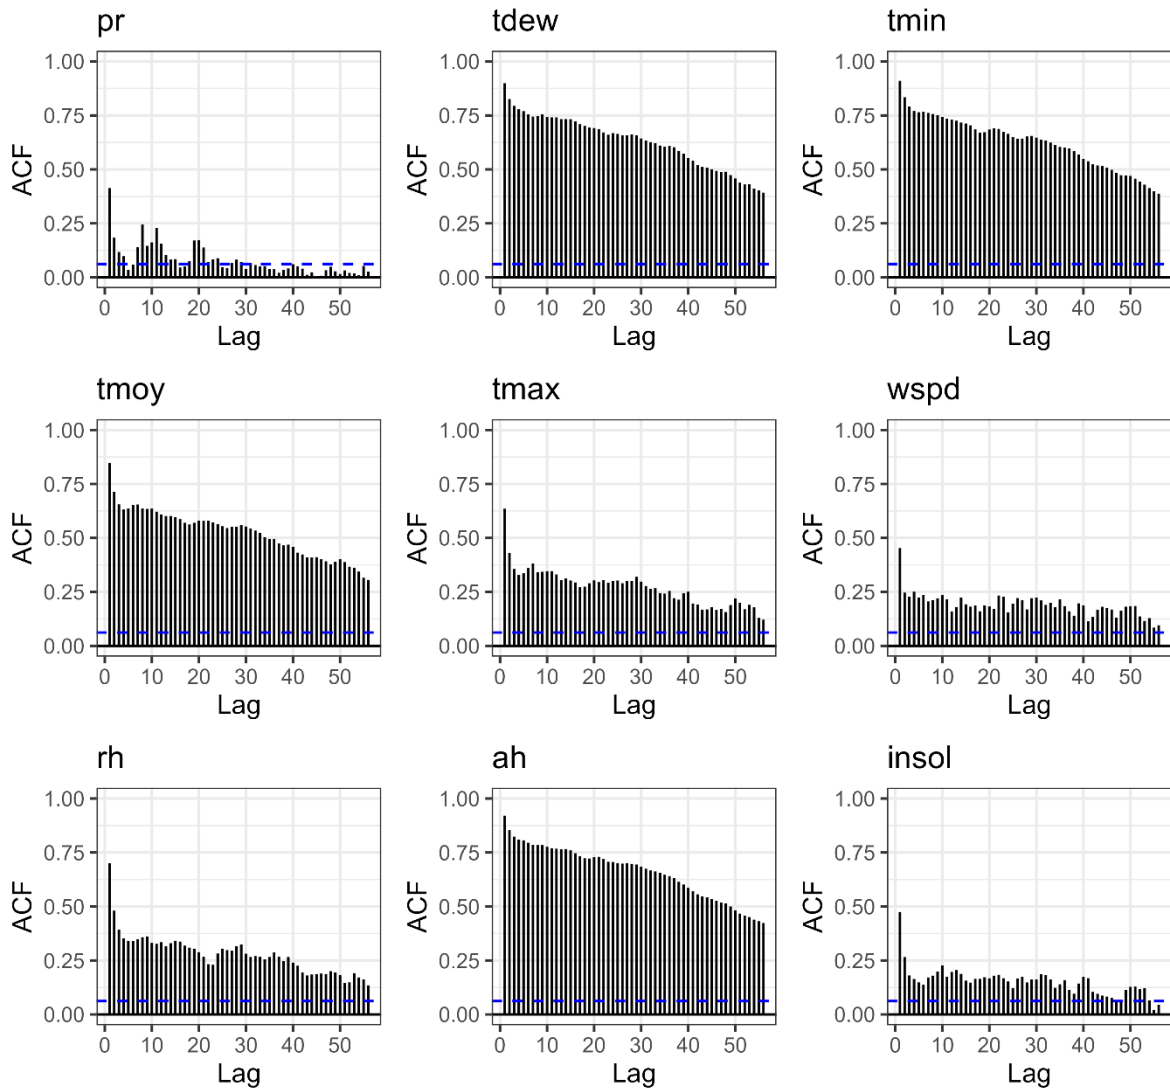

## 20) Ethiopia (ETH)

ACF plots for weather variables from January 1, 2020 to September 30, 2022

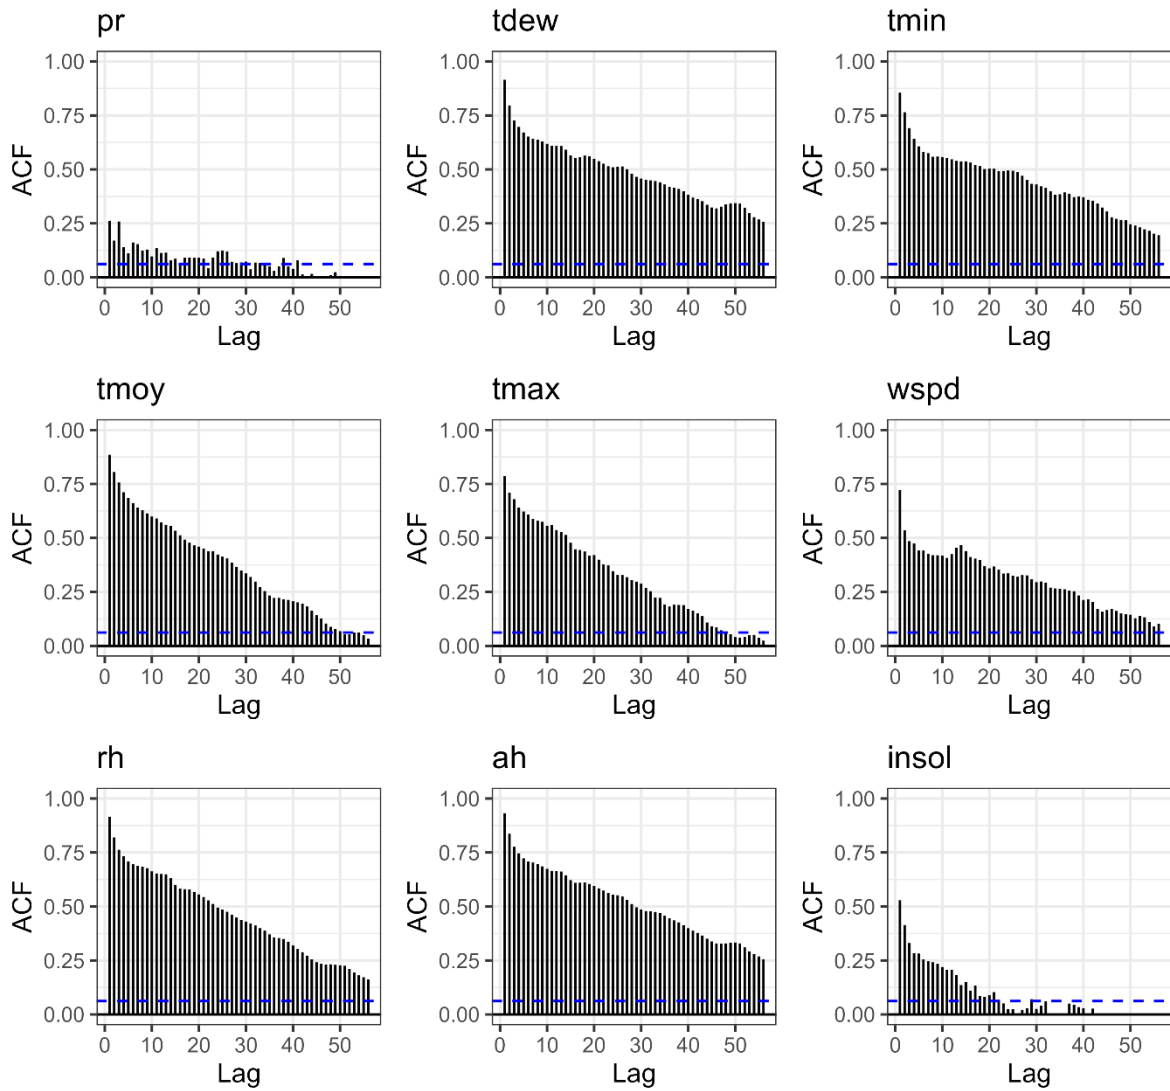

## 21) Gabon (GAB)

ACF plots for weather variables from January 1, 2020 to September 30, 2022

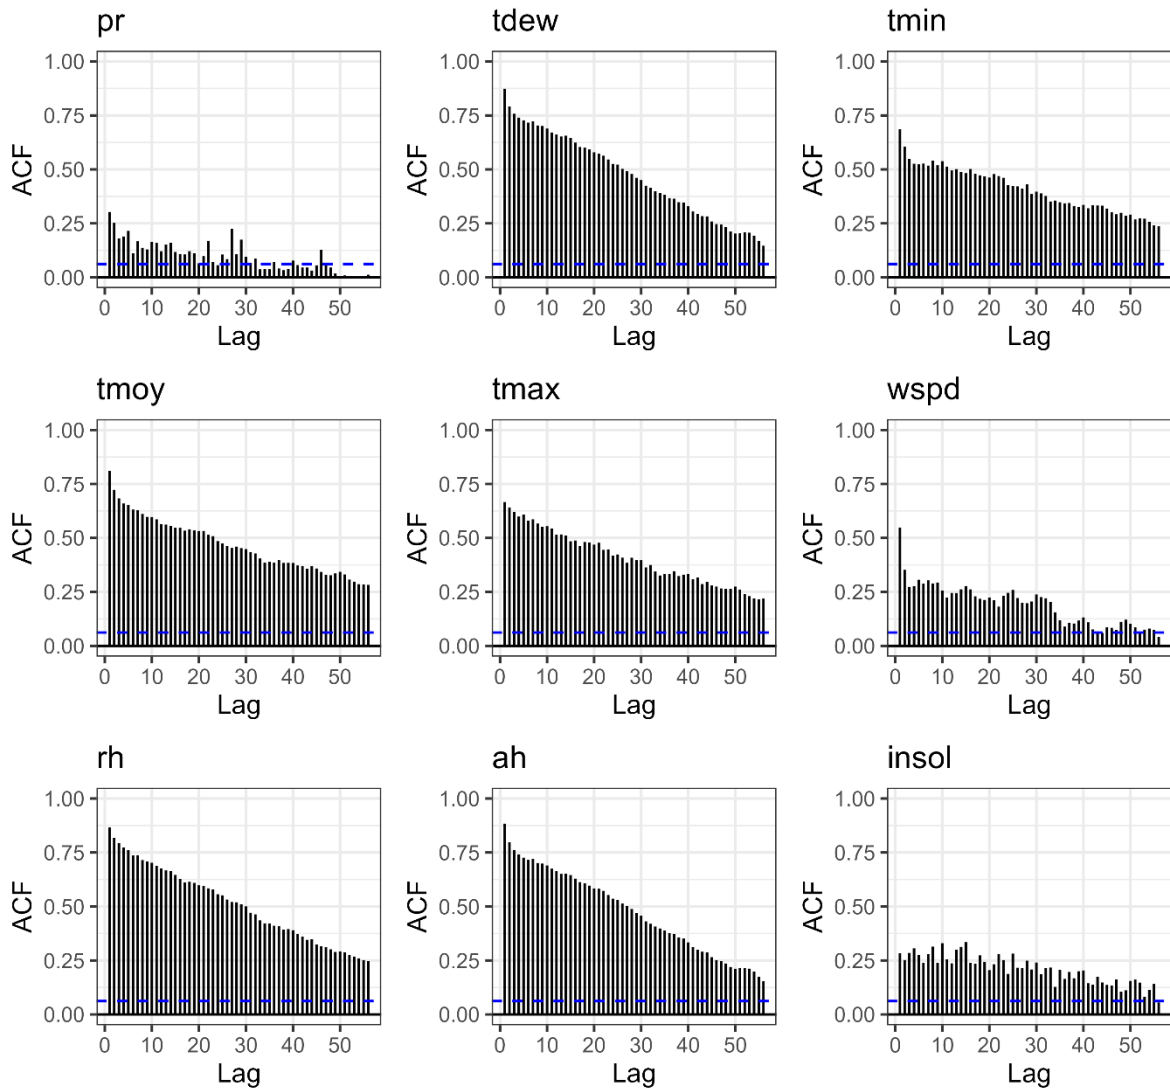

## 22) Gambia (GMB)

ACF plots for weather variables from January 1, 2020 to September 30, 2022

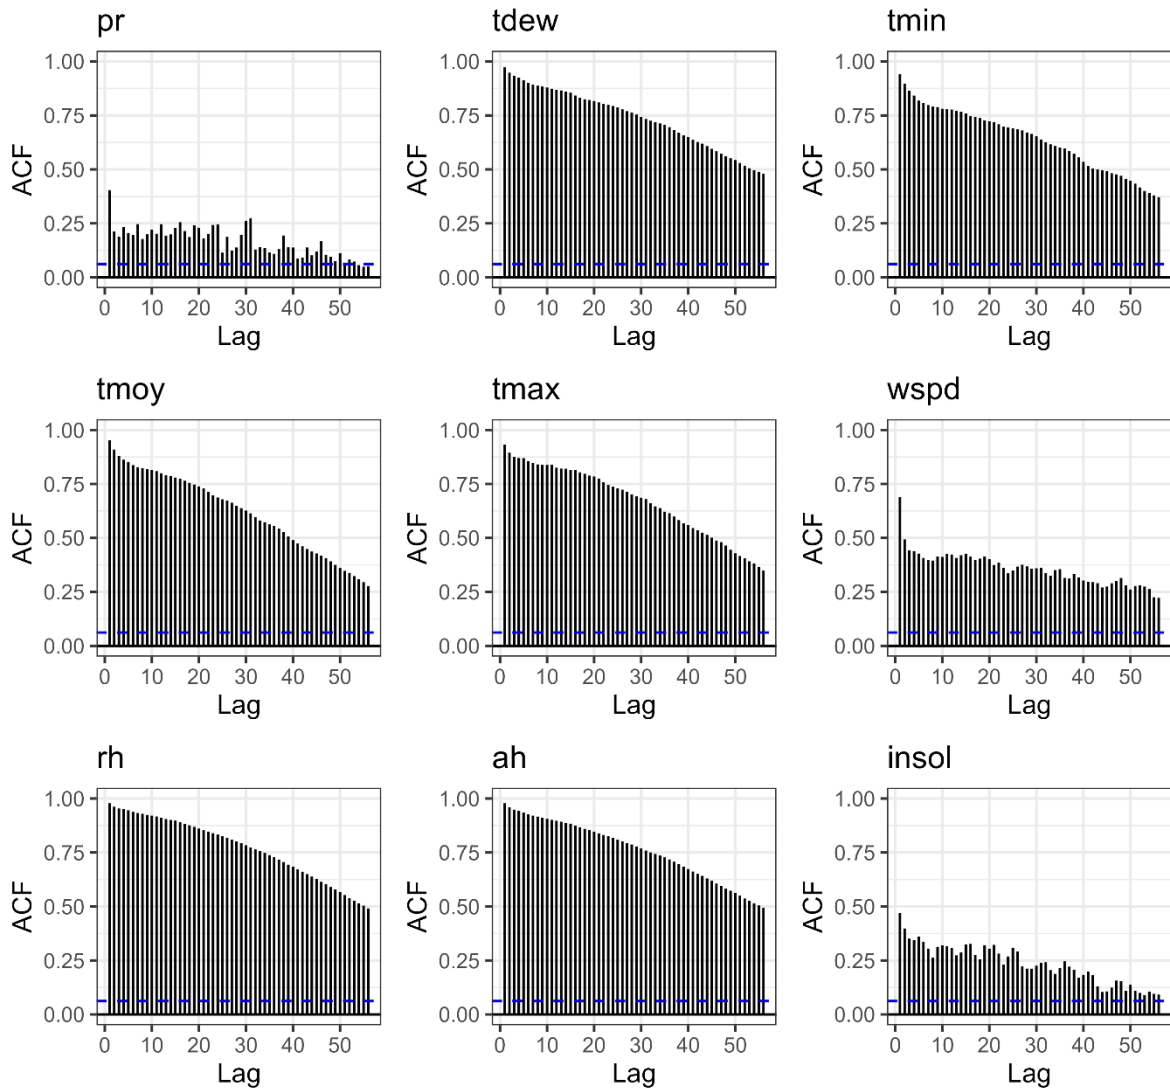

### 23) Ghana (GHA)

ACF plots for weather variables from January 1, 2020 to September 30, 2022

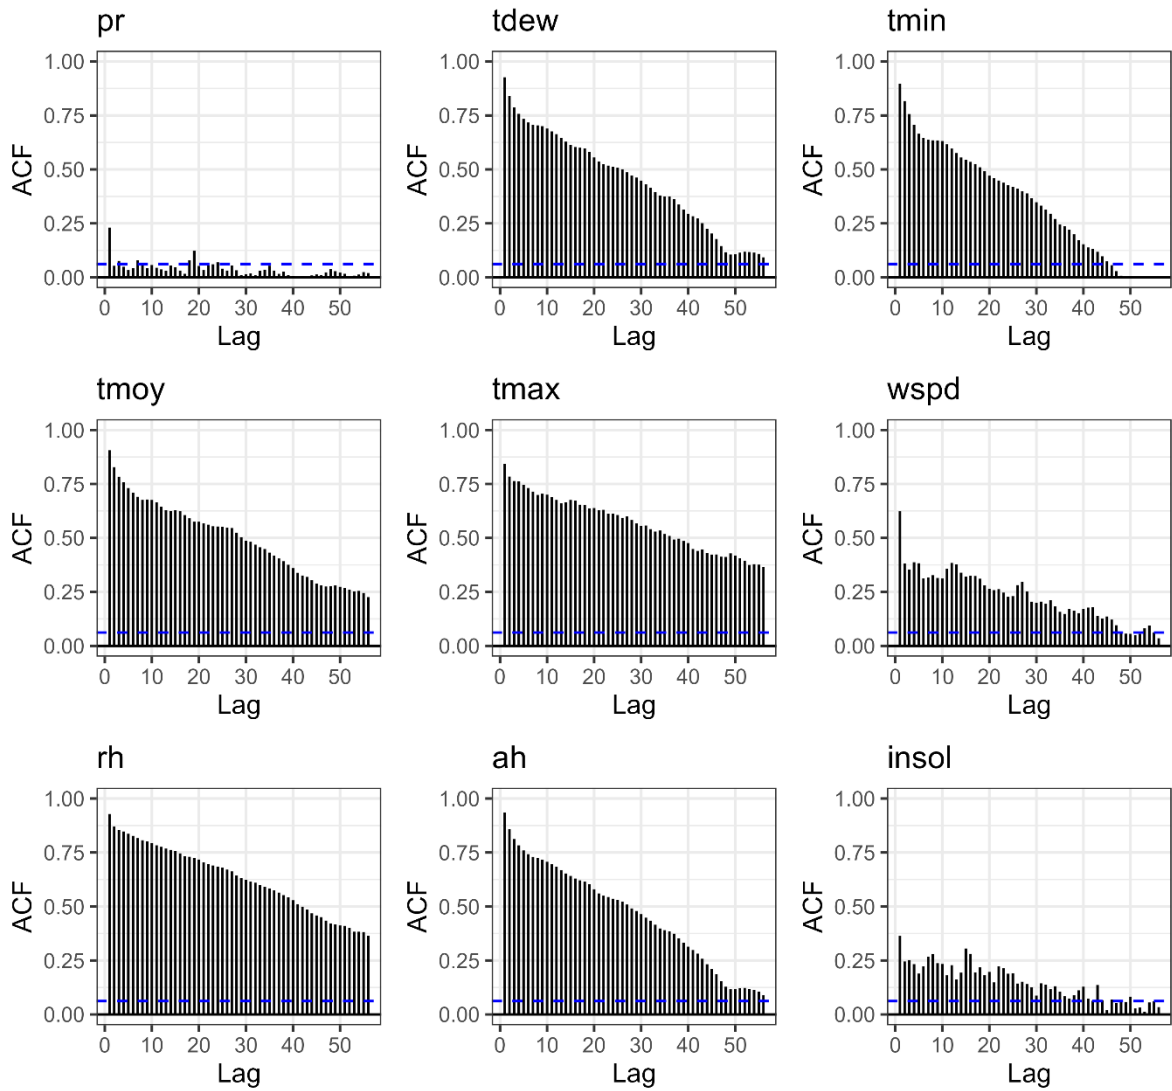



## 24) Guinea (GIN)

ACF plots for weather variables from January 1, 2020 to September 30, 2022

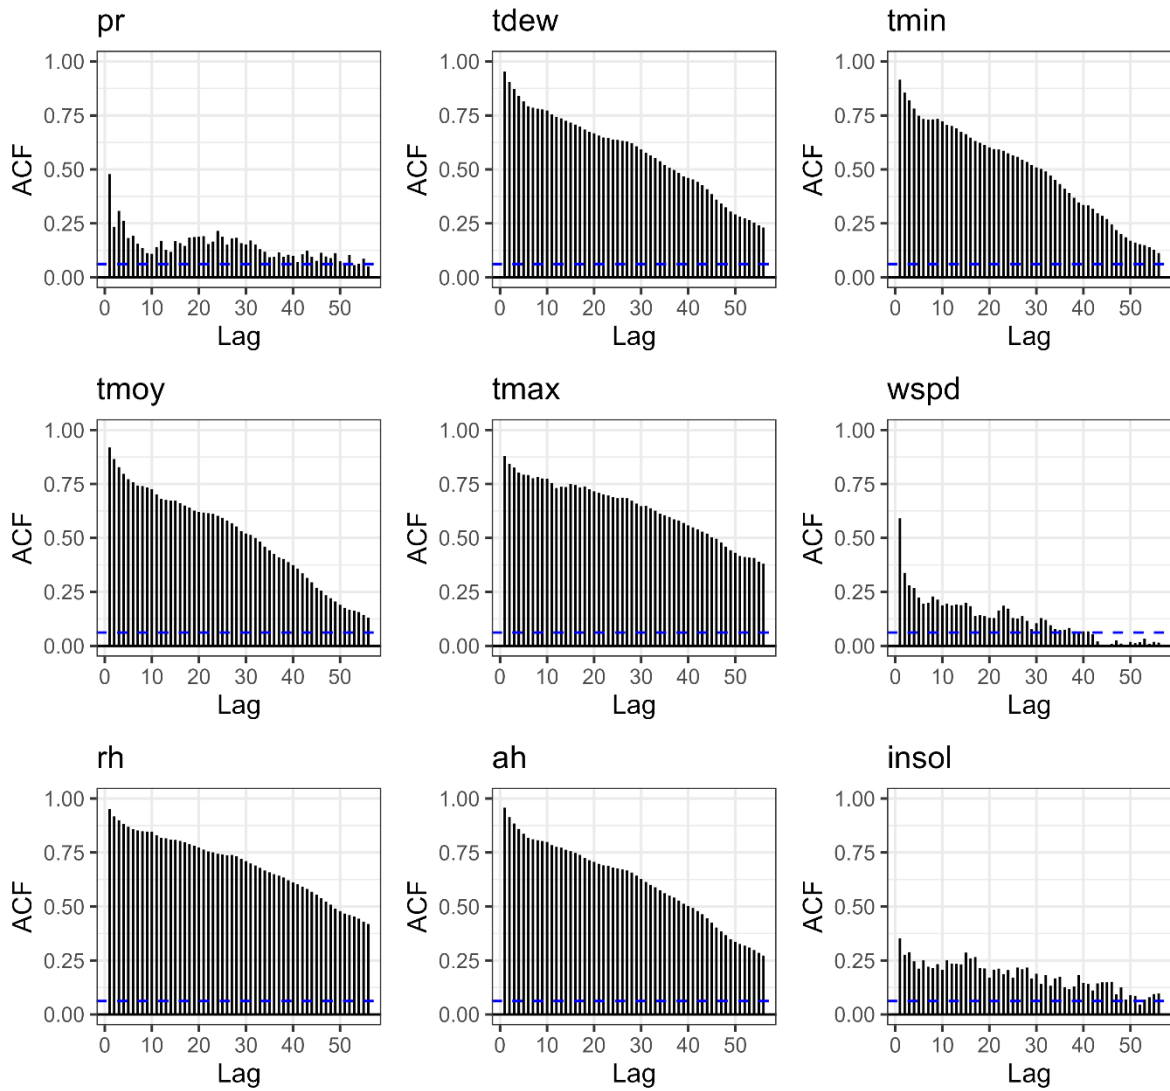

## 25) Guinea-Bissau (GNB)

ACF plots for weather variables from January 1, 2020 to September 30, 2022

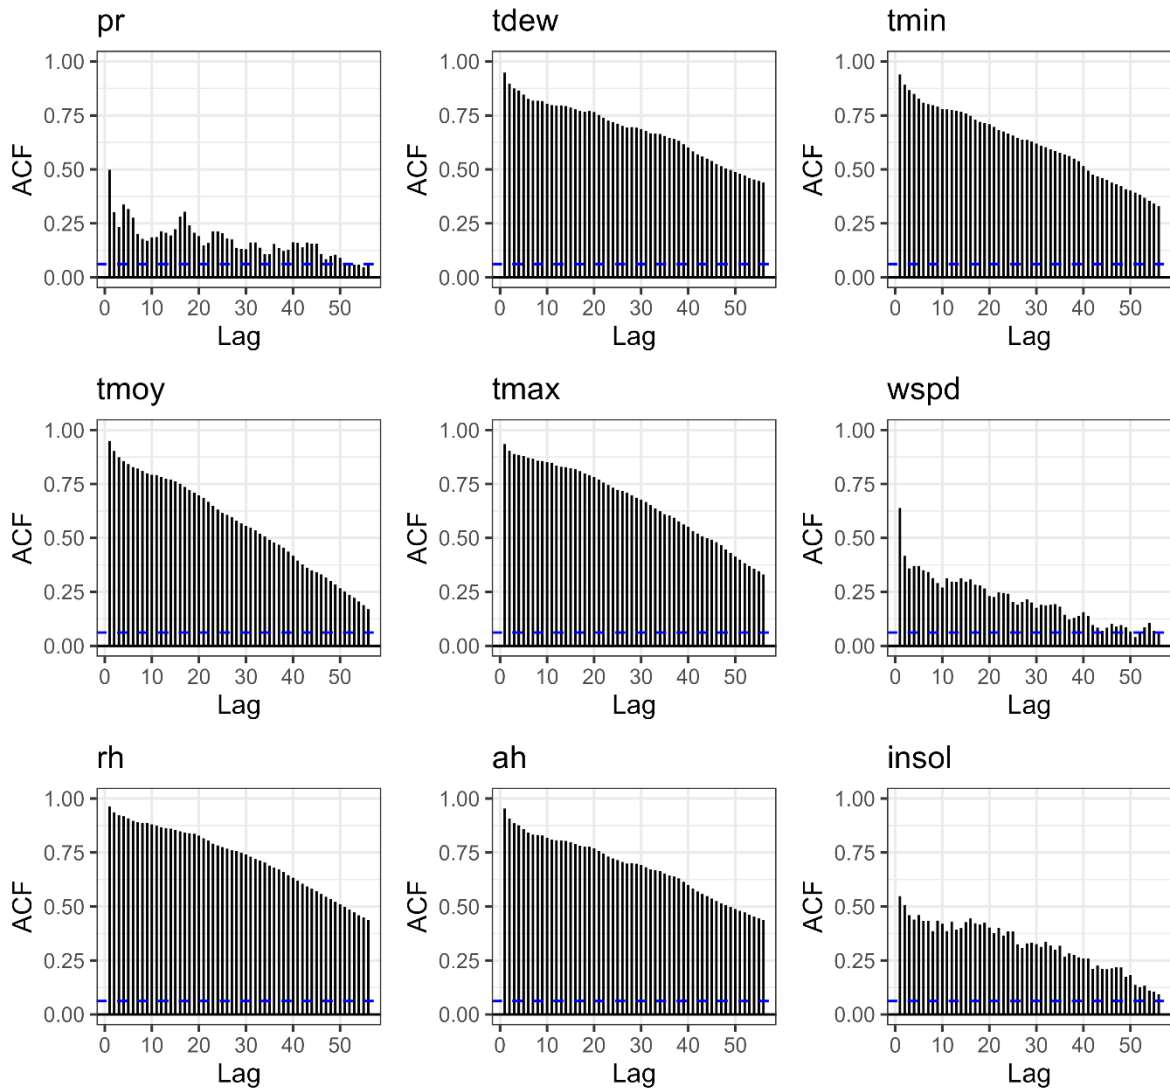

## 26) Kenya (KEN)

ACF plots for weather variables from January 1, 2020 to September 30, 2022

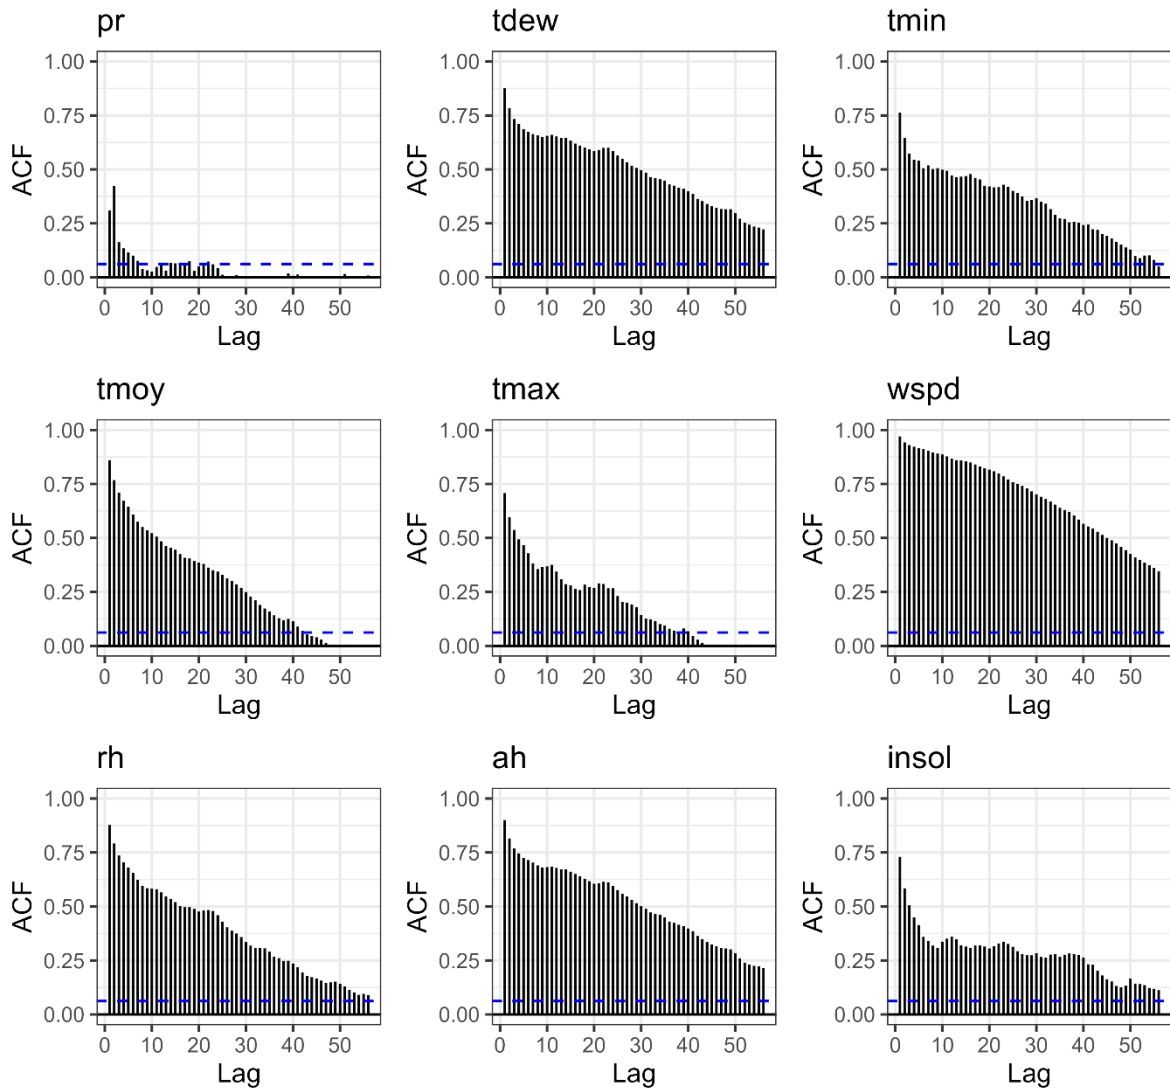

## 27) Lesotho (LSO)

ACF plots for weather variables from January 1, 2020 to September 30, 2022

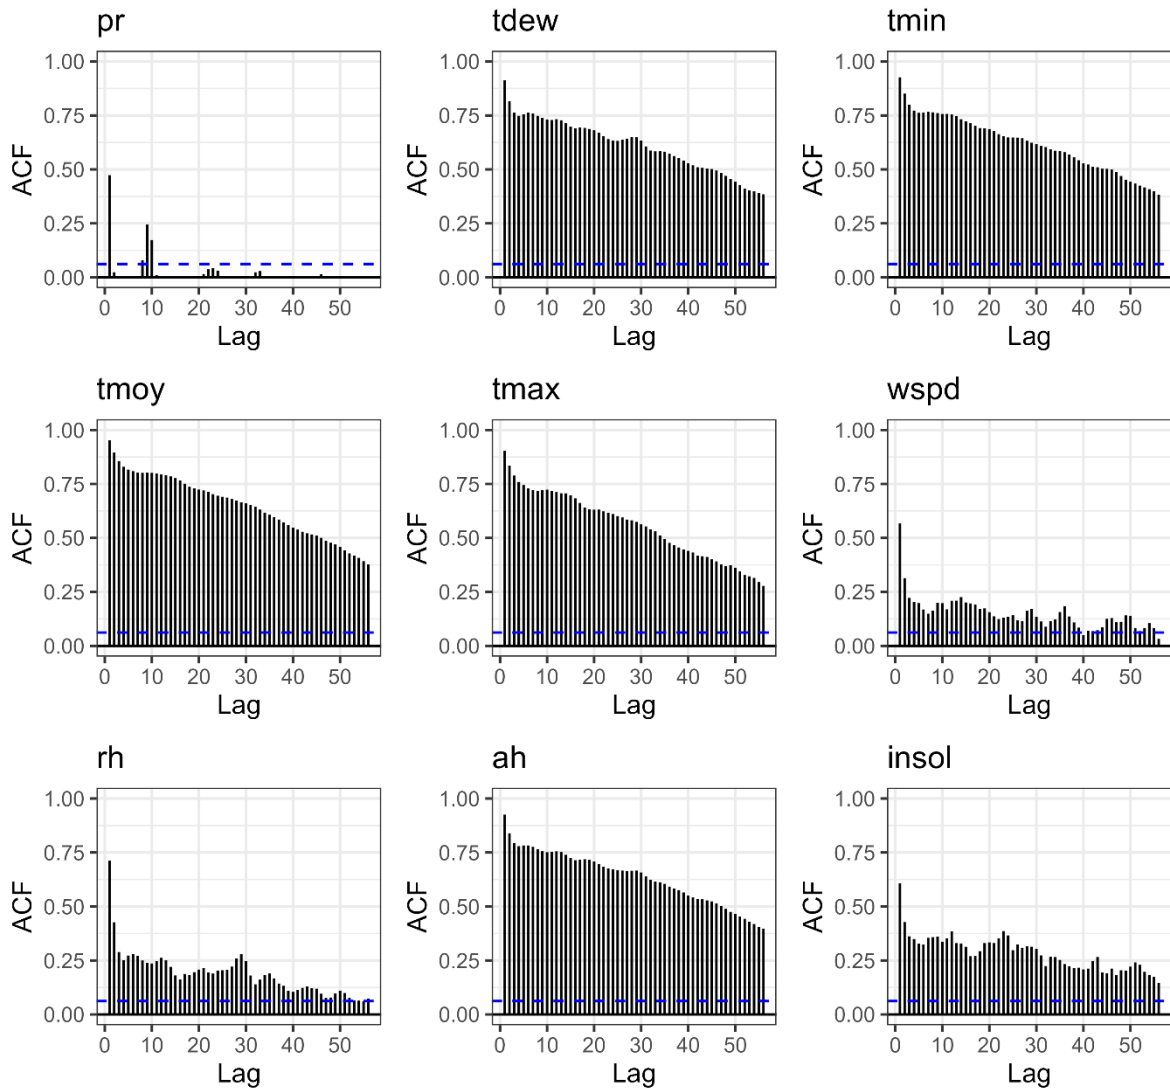

## 28) Liberia (LBR)

ACF plots for weather variables from January 1, 2020 to September 30, 2022

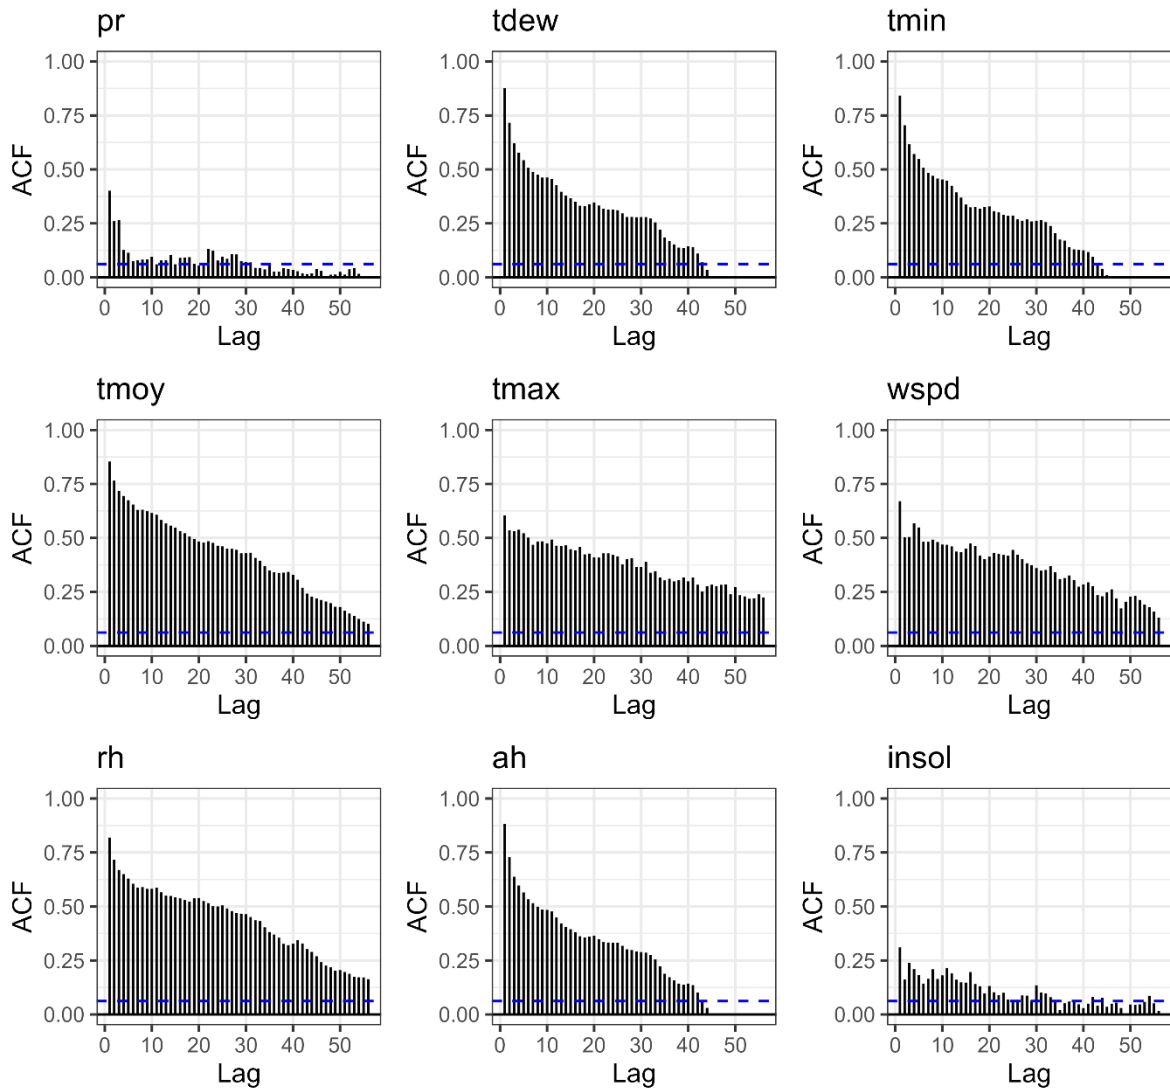

## 29) Libya (LBY)

ACF plots for weather variables from January 1, 2020 to September 30, 2022

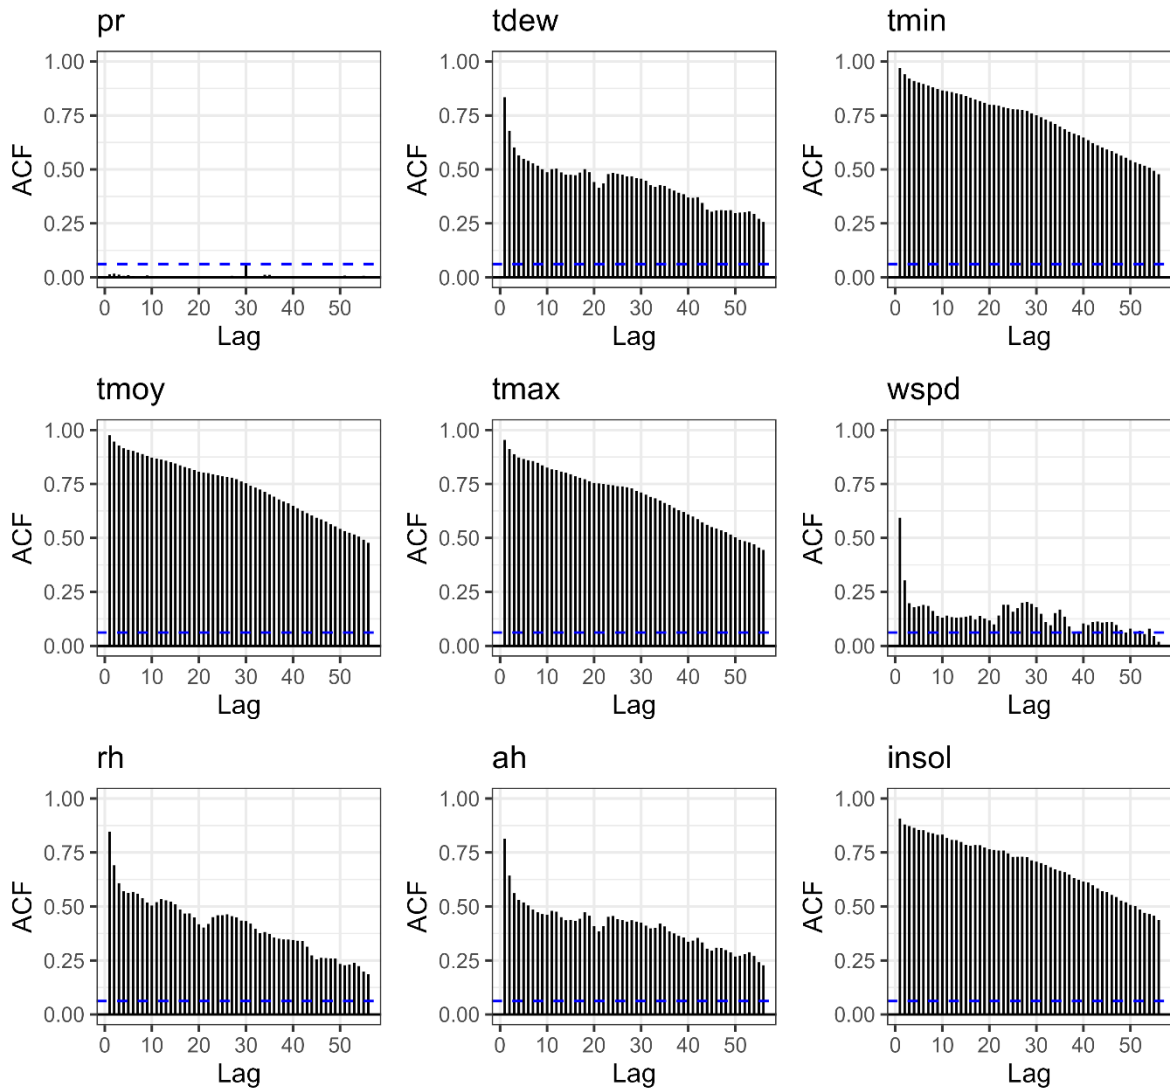

### 30) Madagascar (MDG)

ACF plots for weather variables from January 1, 2020 to September 30, 2022

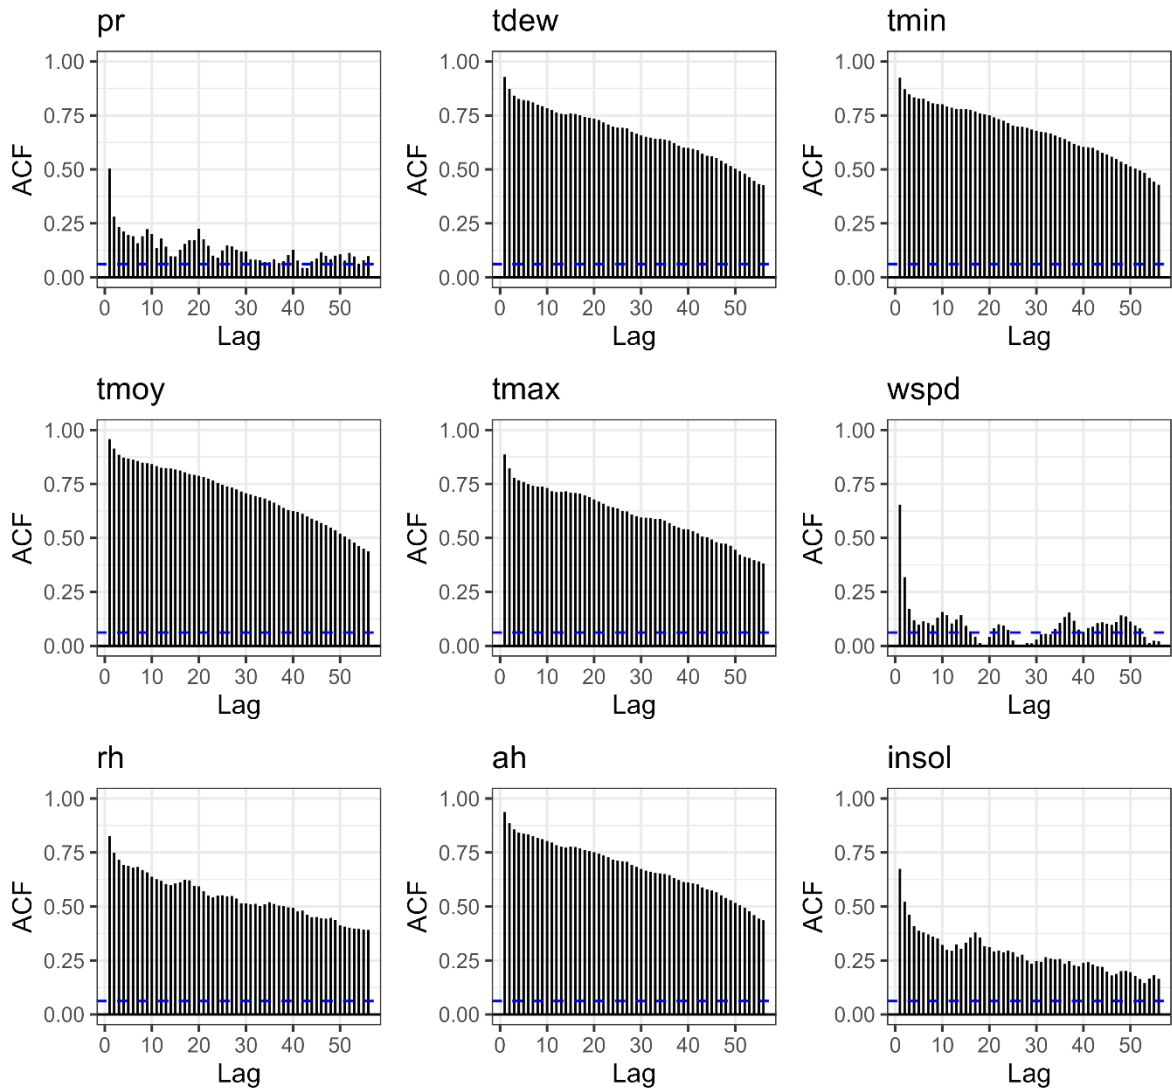

### 31) Malawi (MWI)

ACF plots for weather variables from January 1, 2020 to September 30, 2022

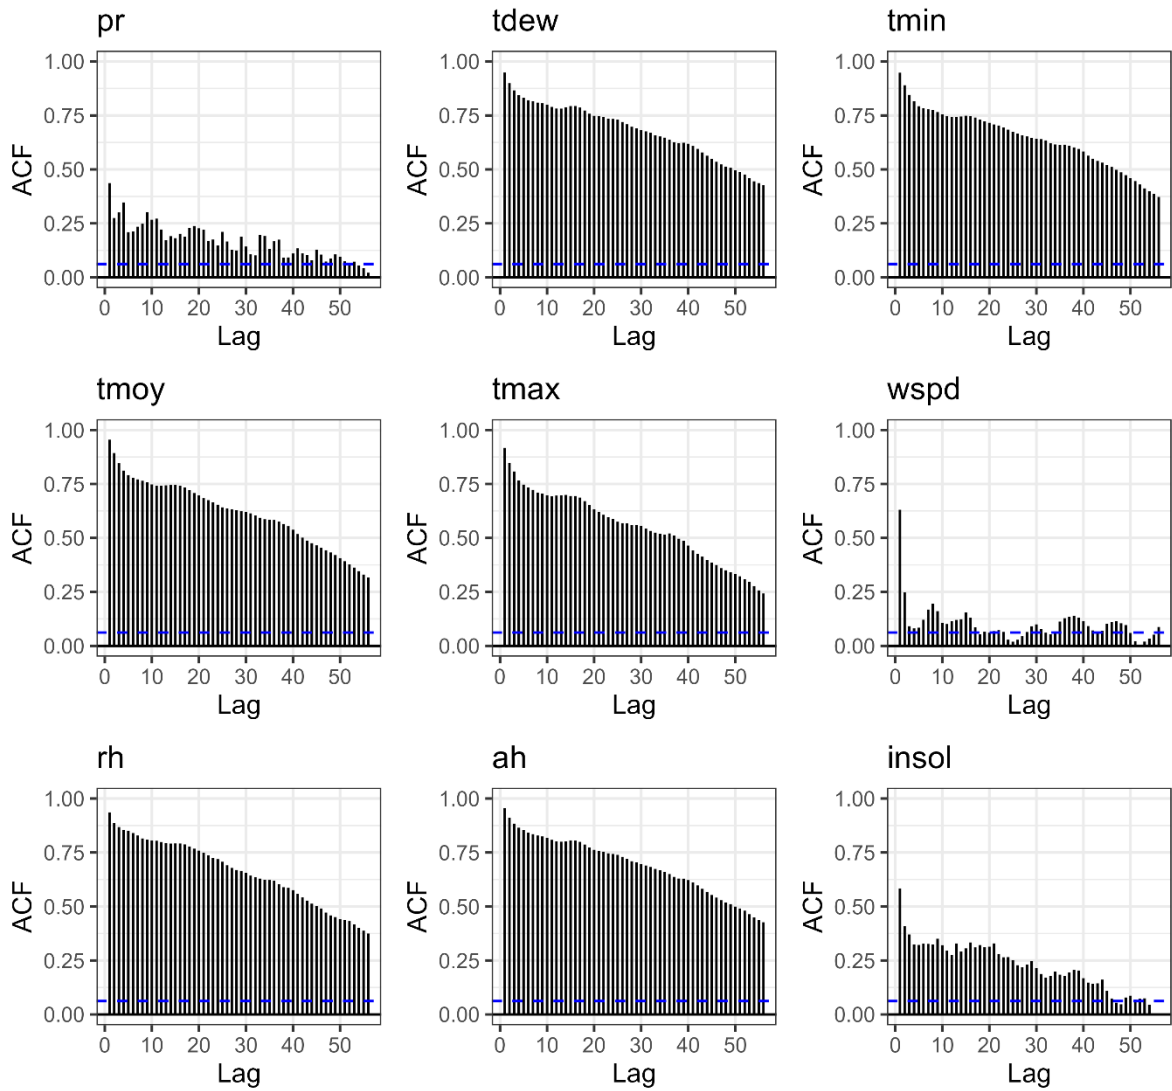



### 32) Mali (MLI)

ACF plots for weather variables from January 1, 2020 to September 30, 2022

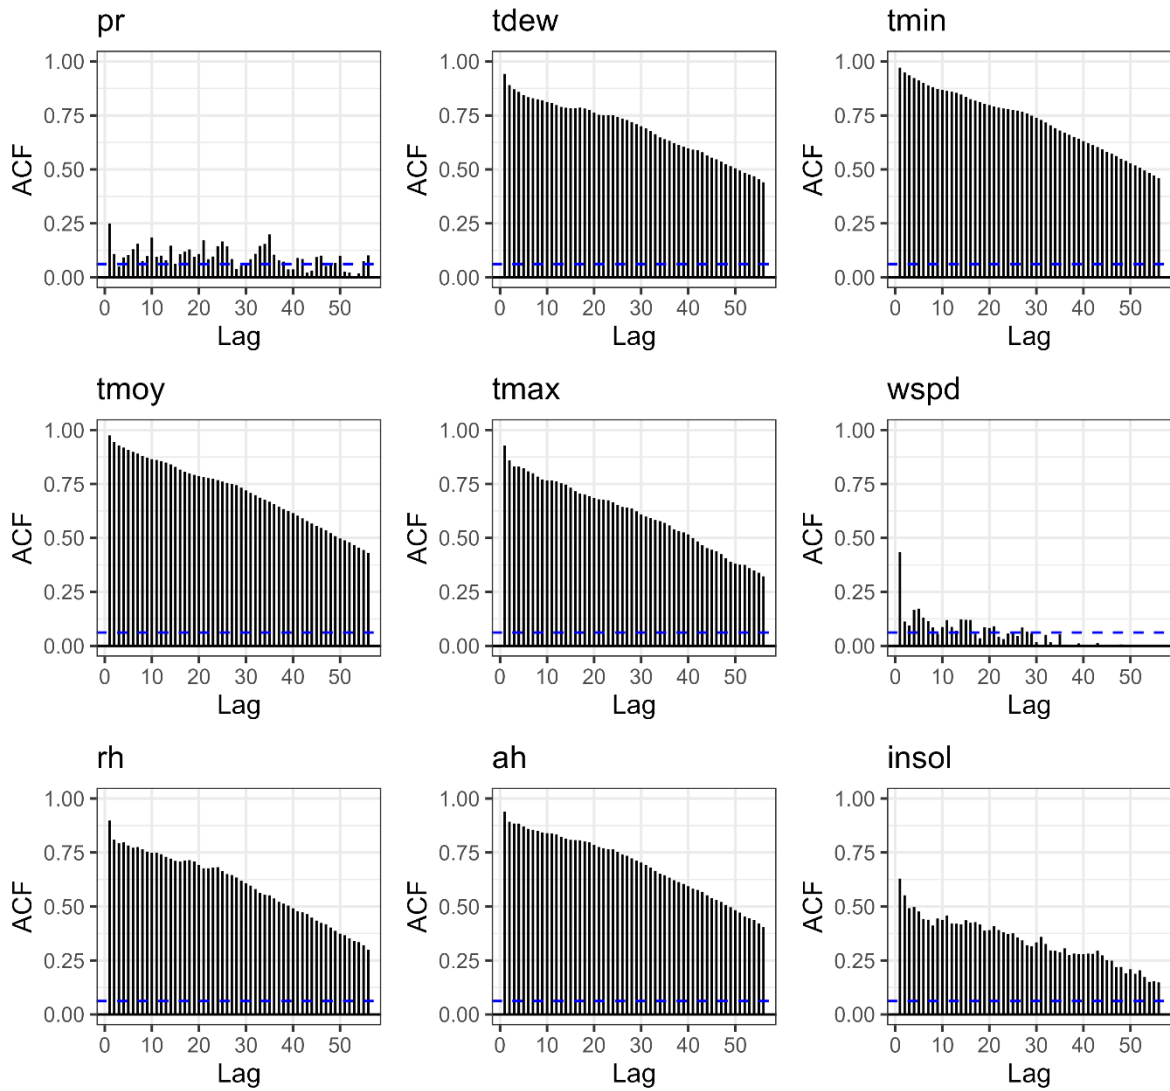

### 33) Mauritania (MRT)

ACF plots for weather variables from January 1, 2020 to September 30, 2022

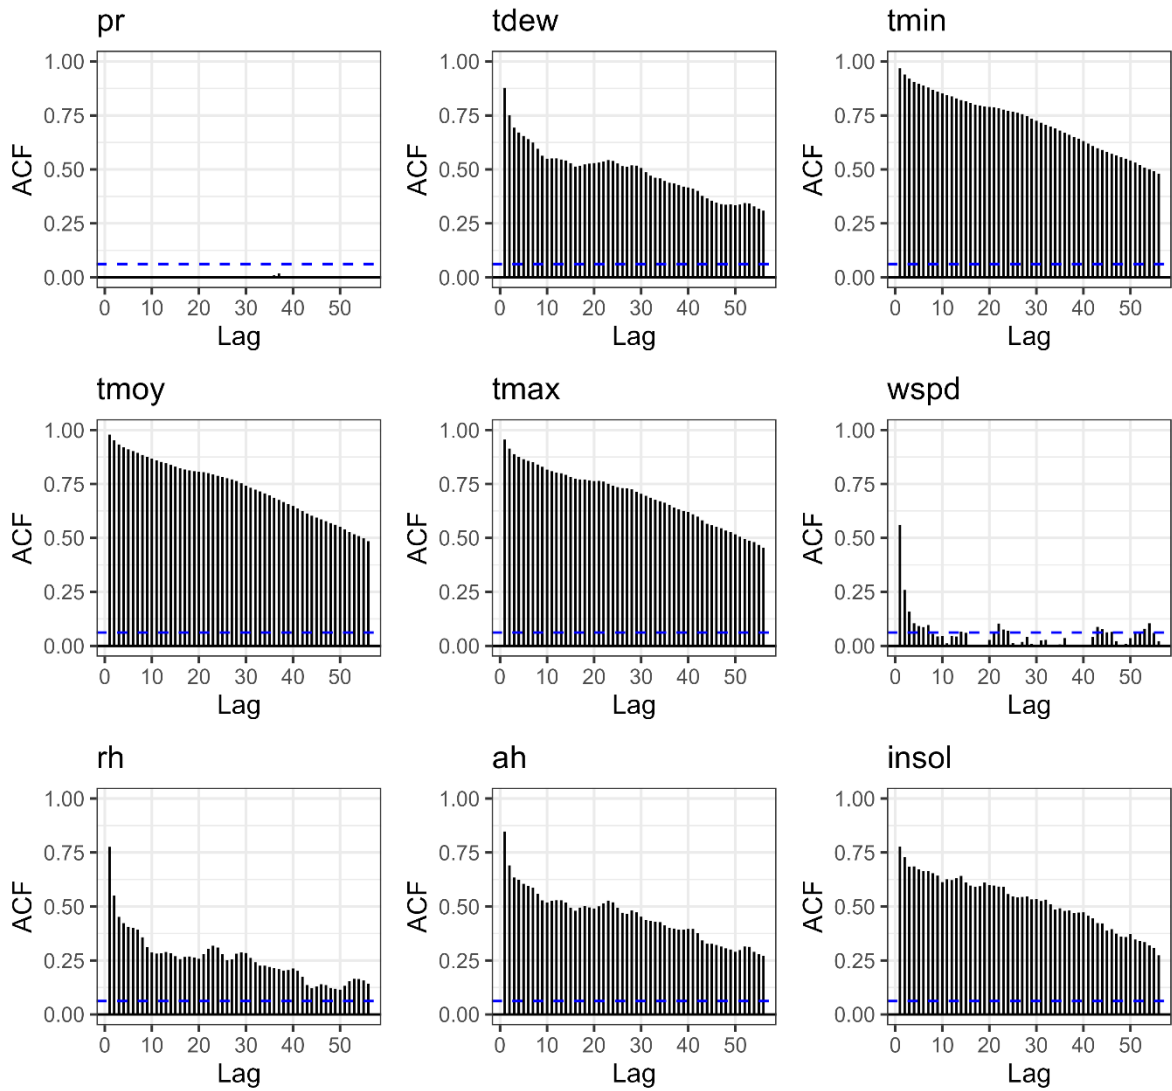

### 34) Mauritius (MUS)

ACF plots for weather variables from January 1, 2020 to September 30, 2022

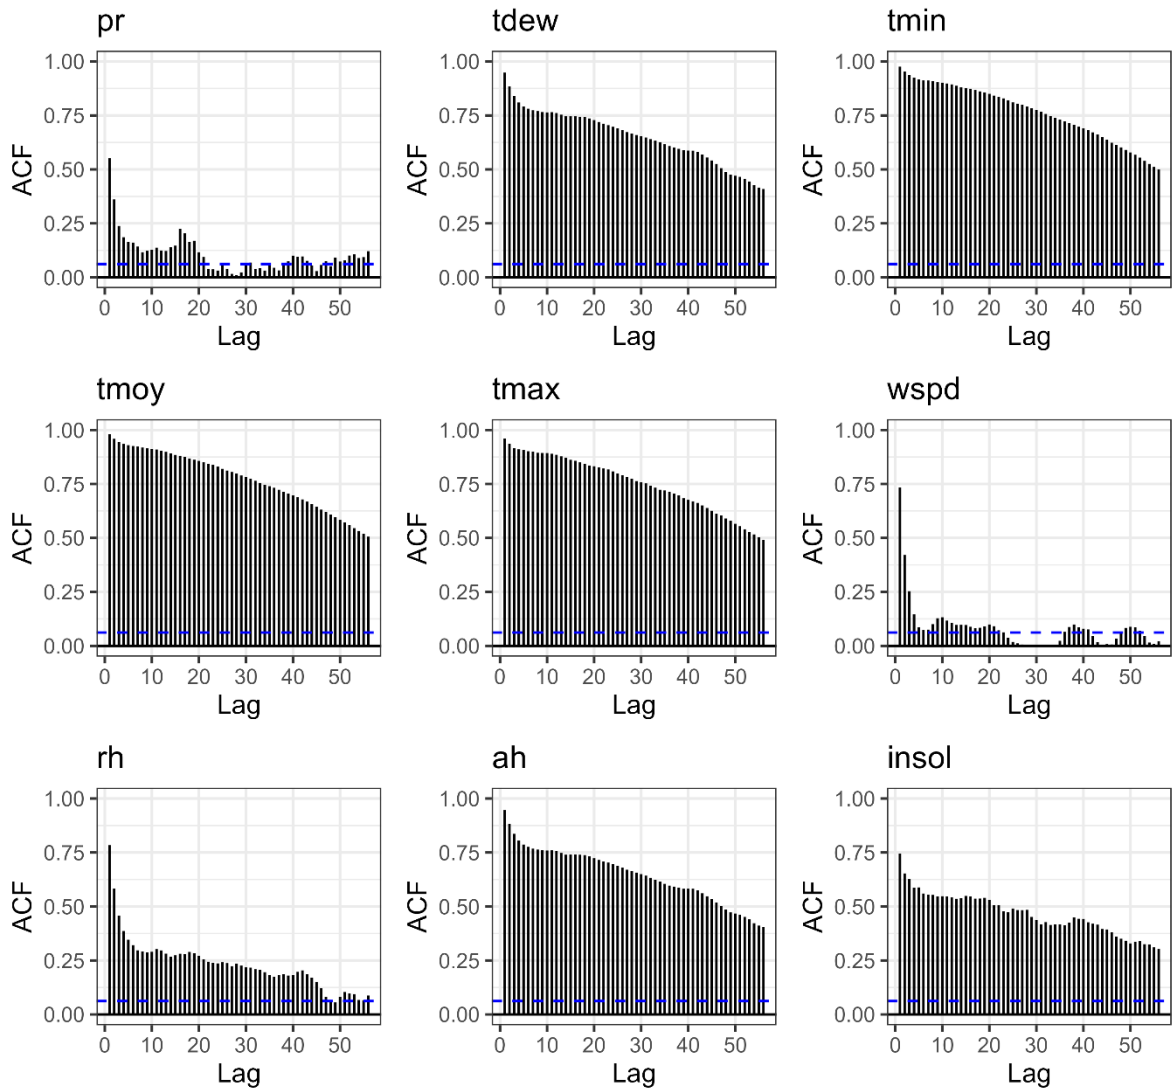

### 35) Morocco (MAR)

ACF plots for weather variables from January 1, 2020 to September 30, 2022

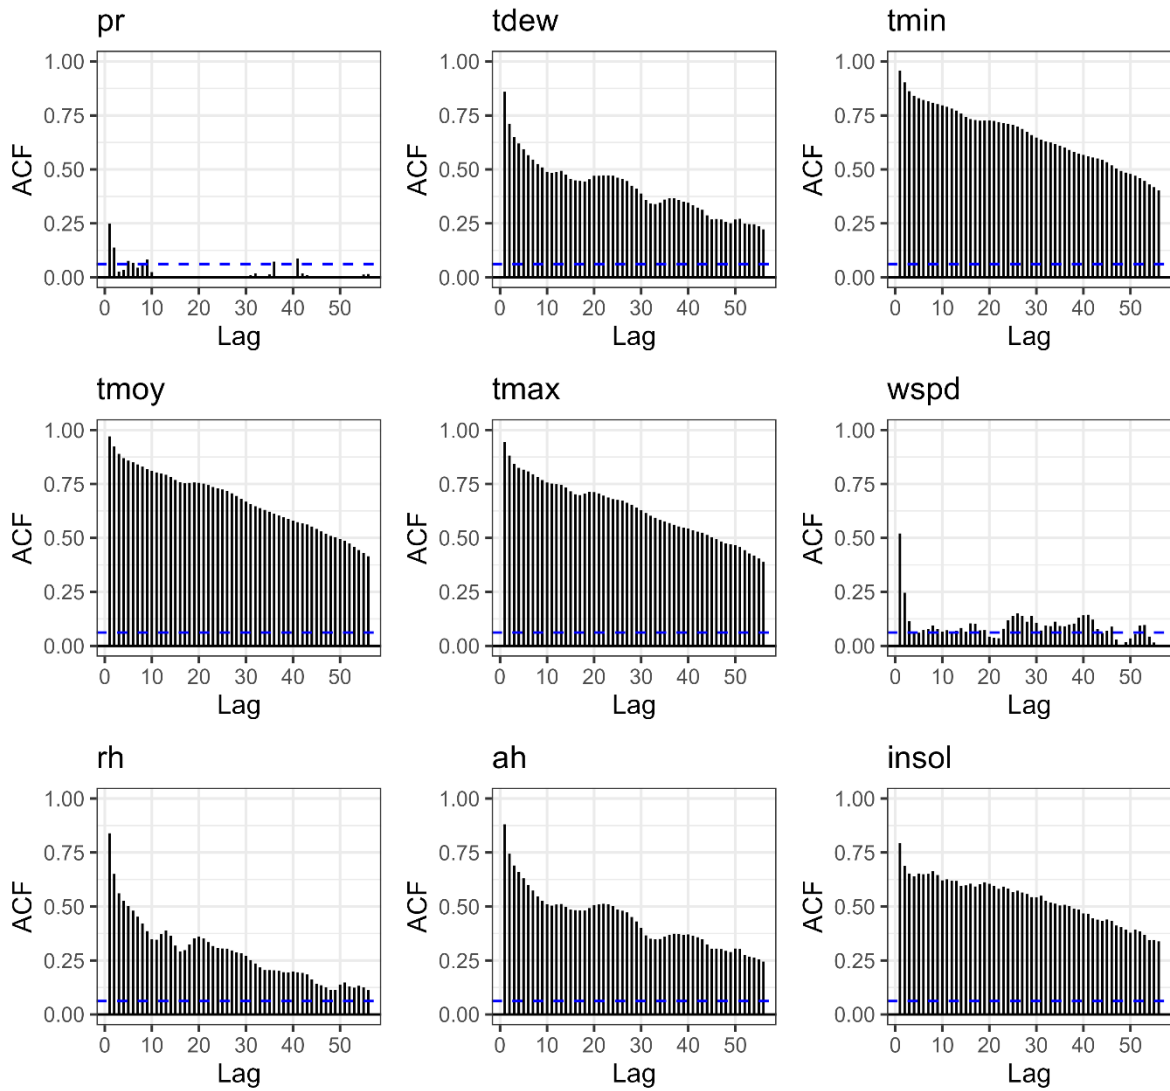

### 36) Mozambique (MOZ)

ACF plots for weather variables from January 1, 2020 to September 30, 2022

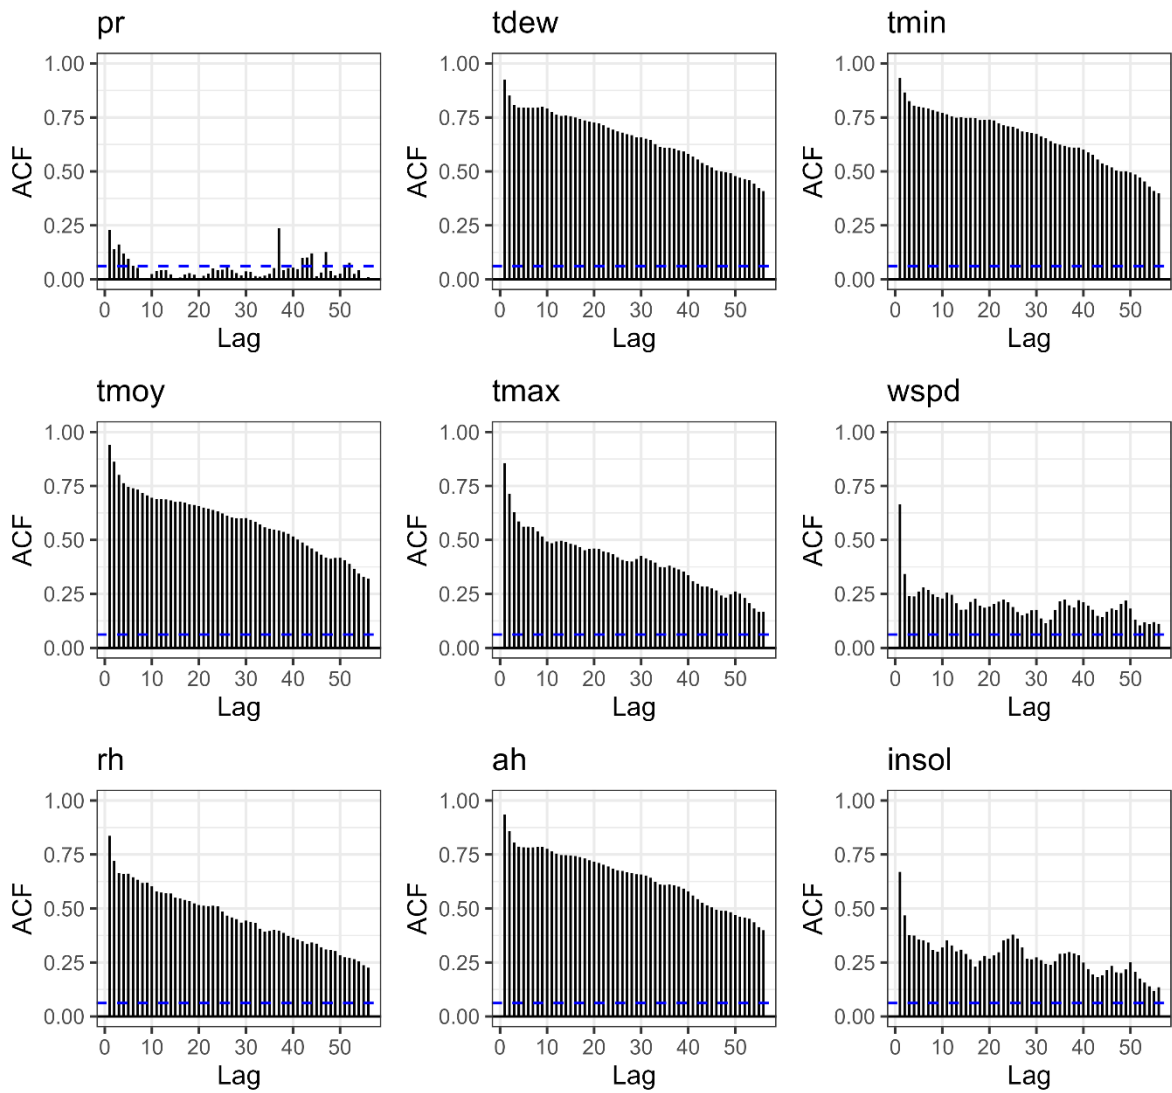

### 37) Namibia (NAM)

ACF plots for weather variables from January 1, 2020 to September 30, 2022

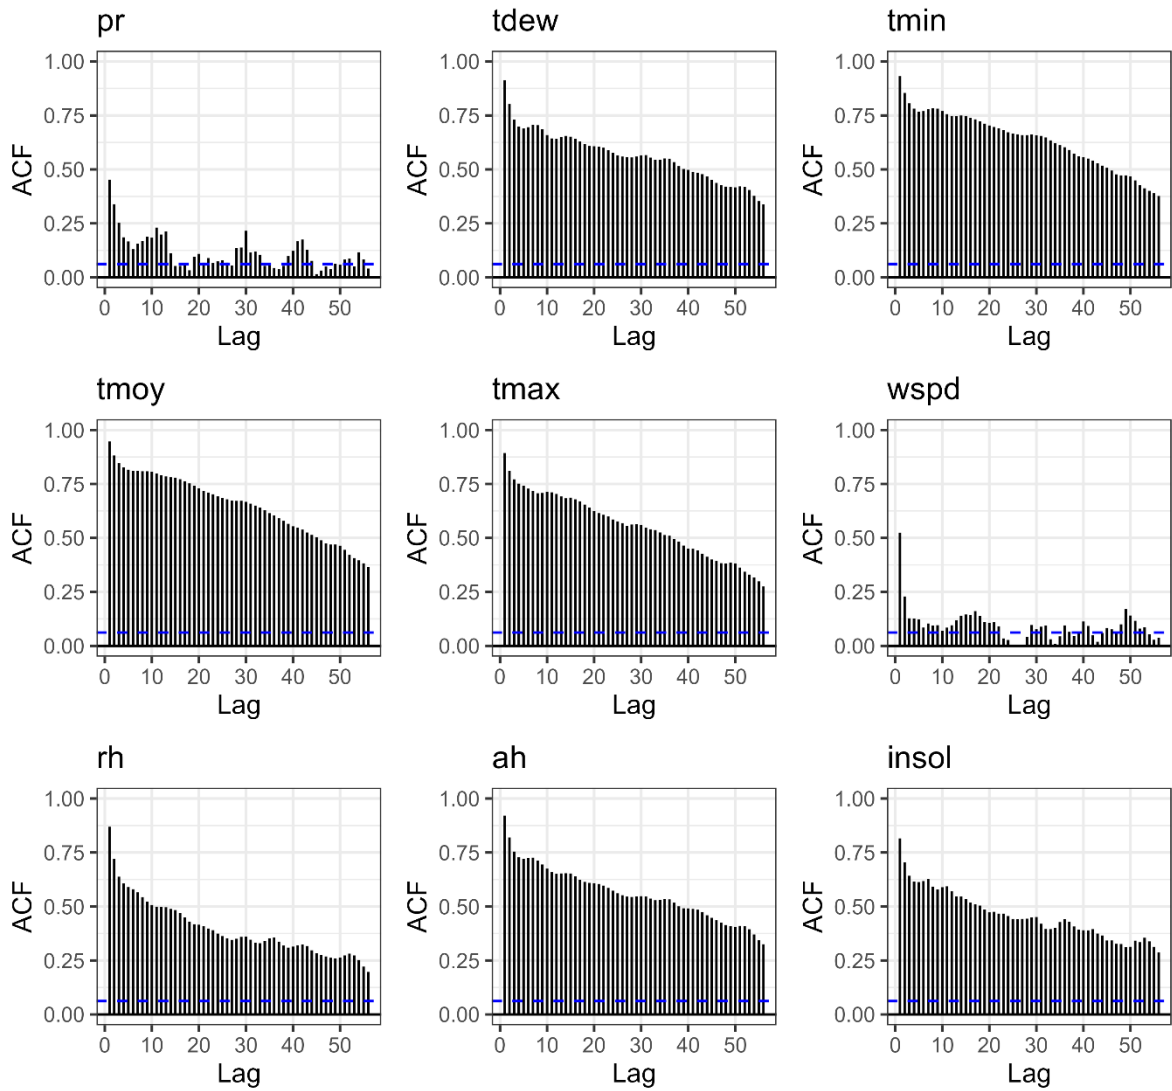

### 38) Niger (NER)

ACF plots for weather variables from January 1, 2020 to September 30, 2022

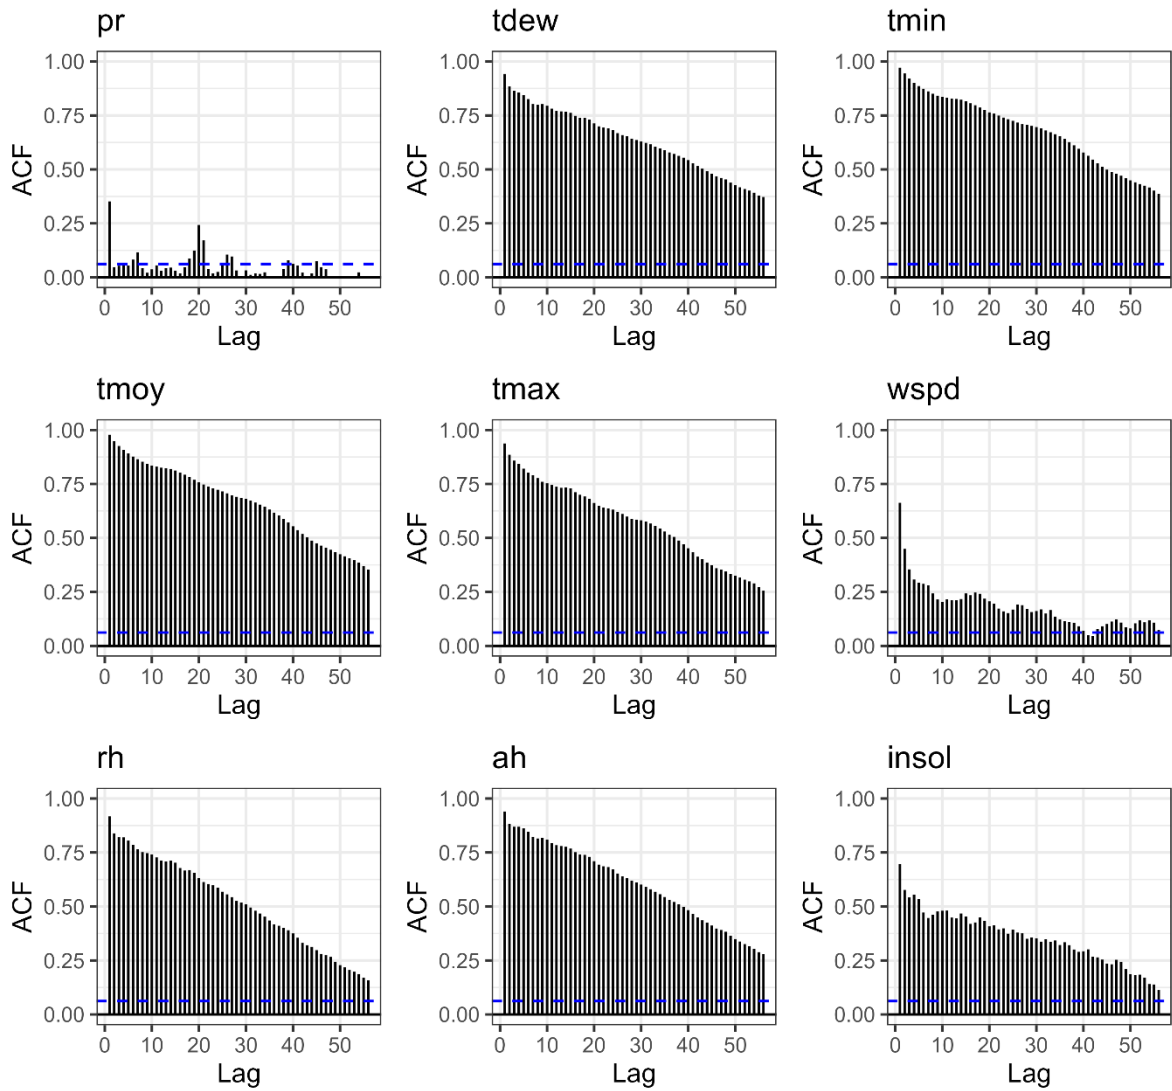

### 39) Nigeria (NGA)

ACF plots for weather variables from January 1, 2020 to September 30, 2022

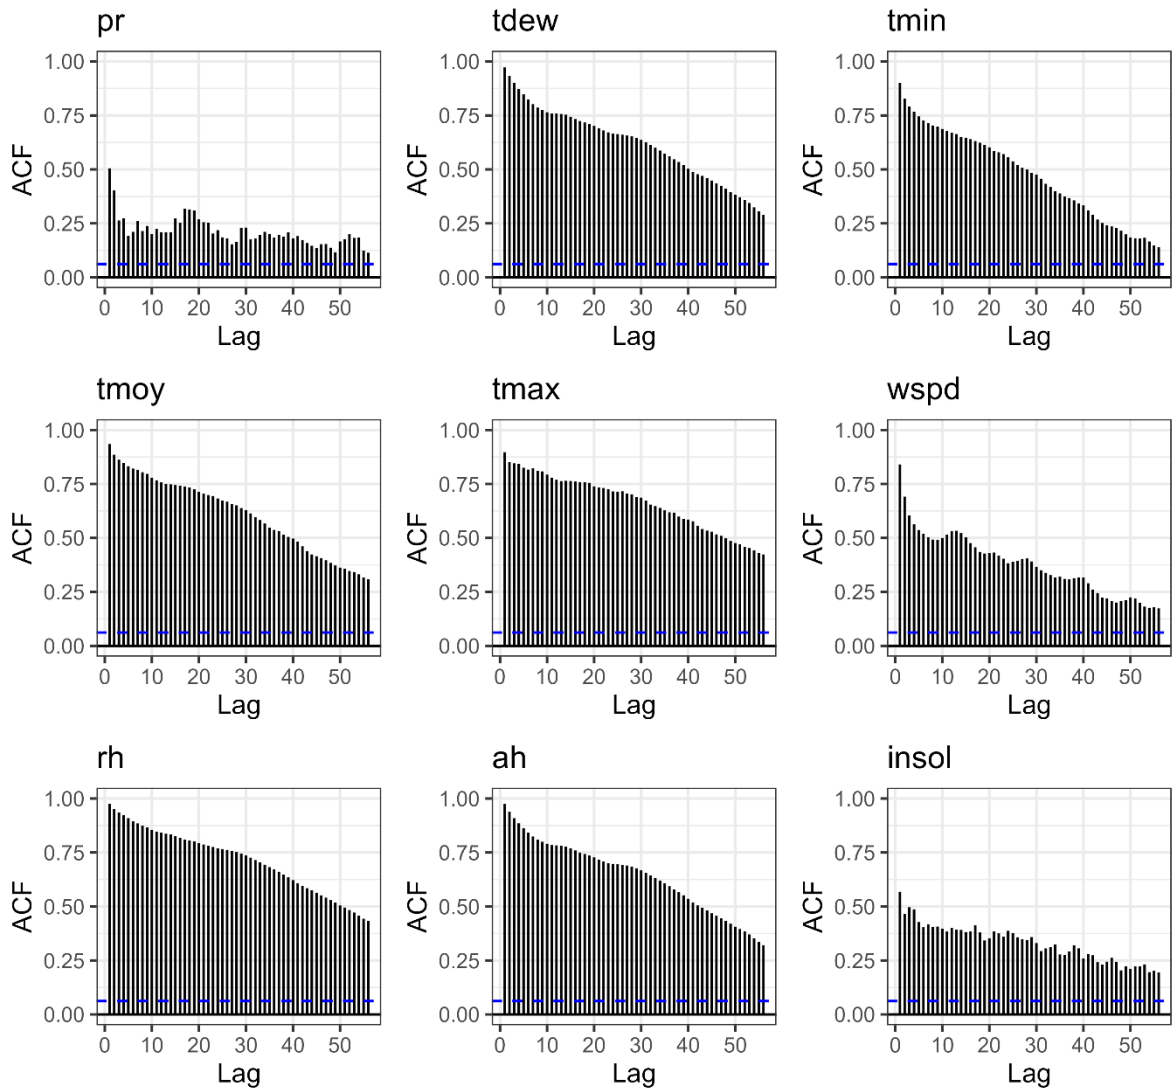



#### 40) Rwanda (RWA)

ACF plots for weather variables from January 1, 2020 to September 30, 2022

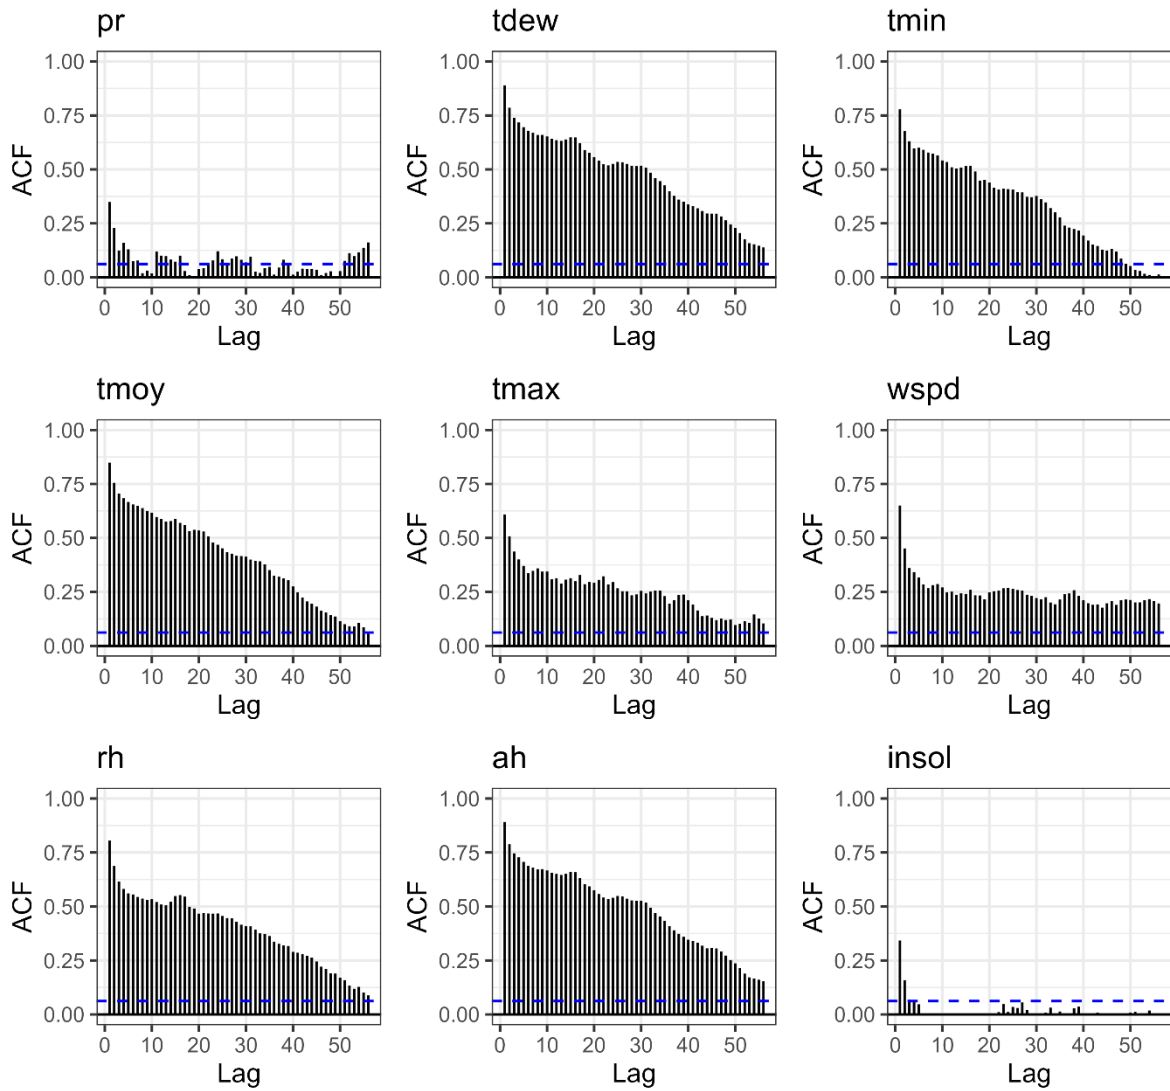

## 41) Sao Tome and Principe (STP)

ACF plots for weather variables from January 1, 2020 to September 30, 2022

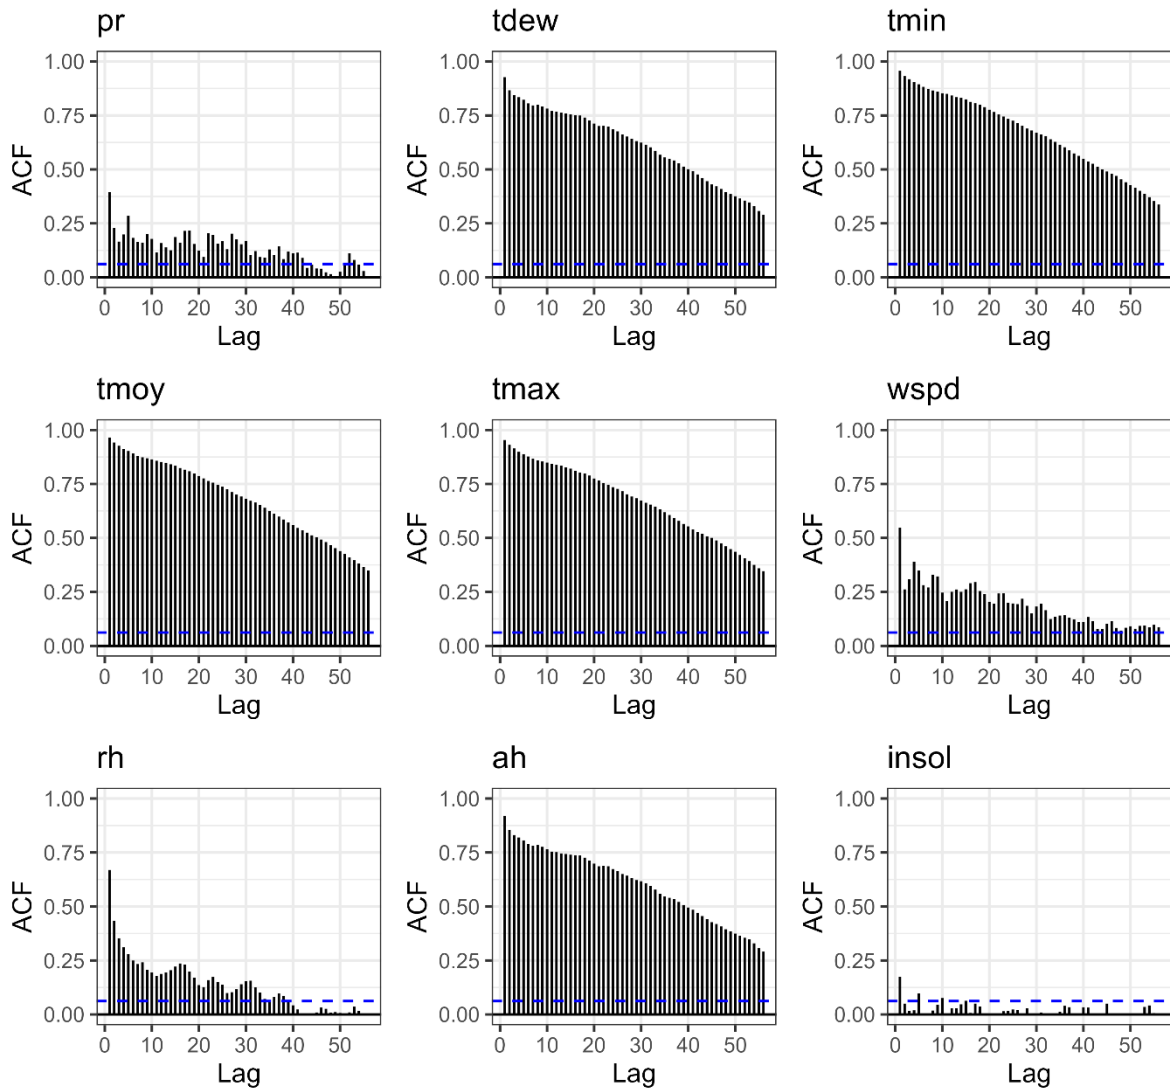

## 42) Senegal (SEN)

ACF plots for weather variables from January 1, 2020 to September 30, 2022

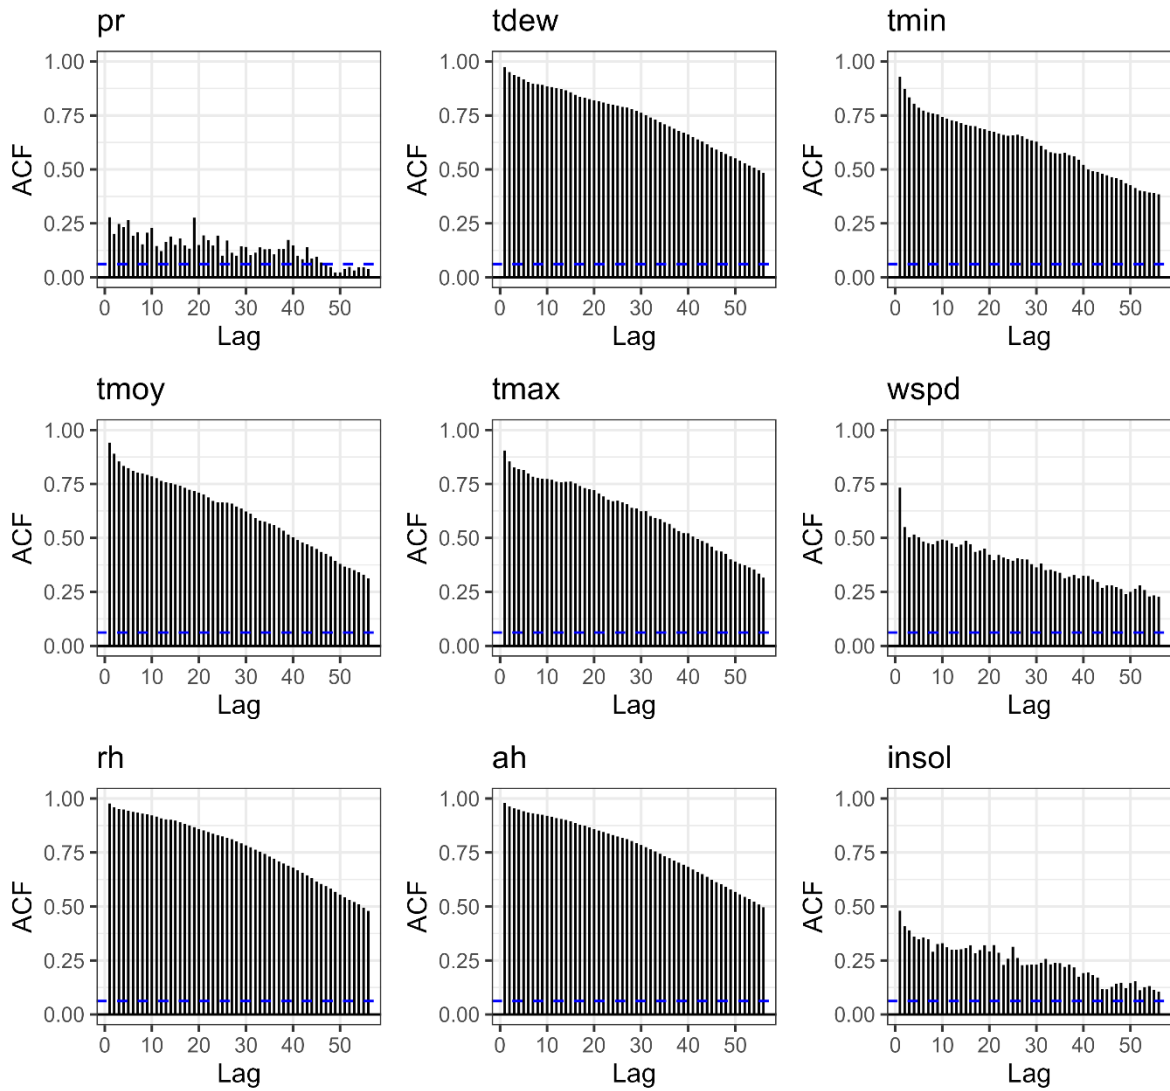

### 43) Seychelles (SYC)

ACF plots for weather variables from January 1, 2020 to September 30, 2022

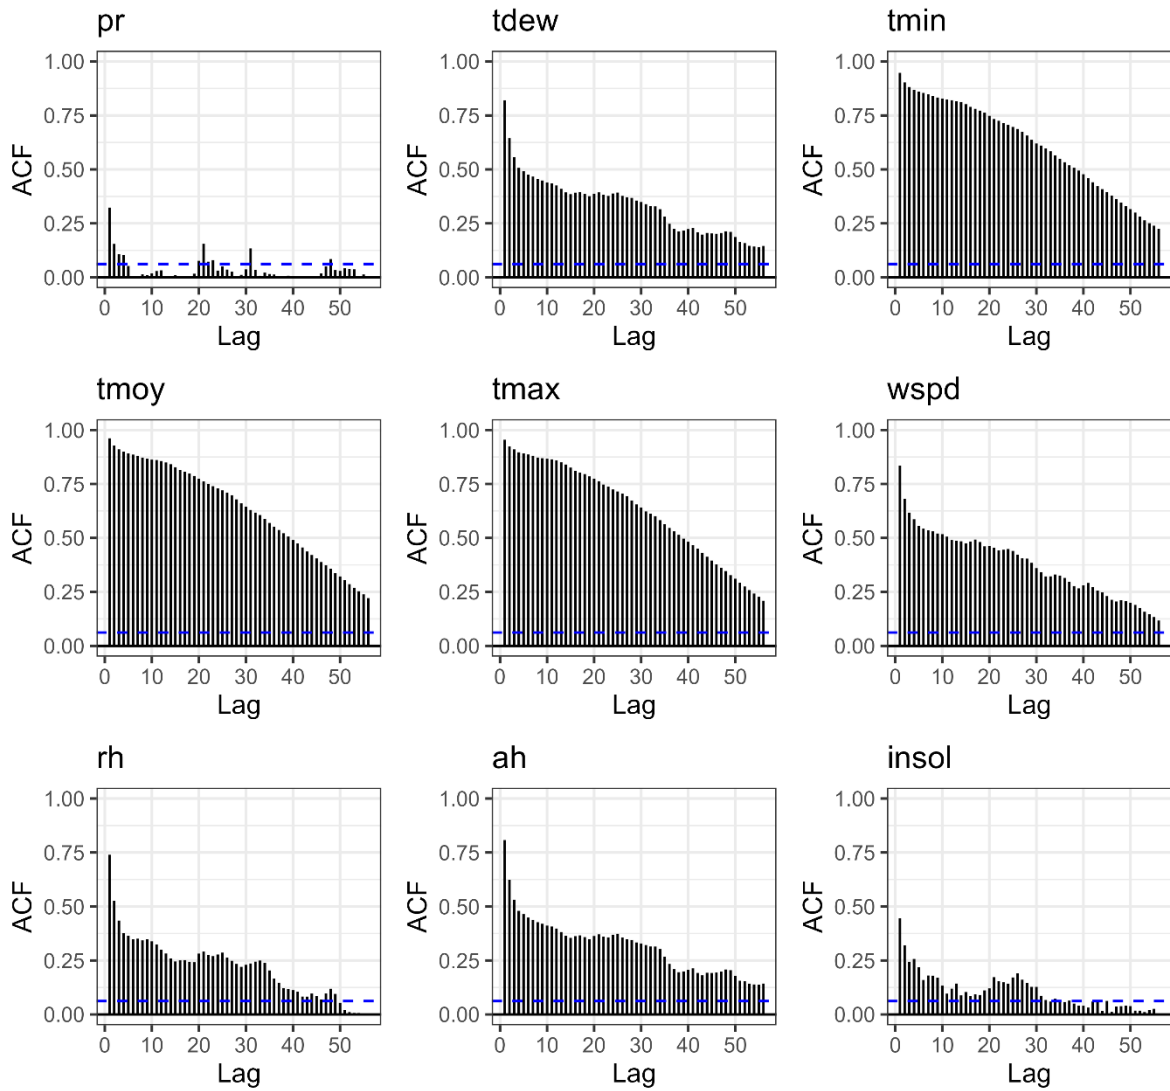

#### 44) Sierra Leone (SLE)

ACF plots for weather variables from January 1, 2020 to September 30, 2022

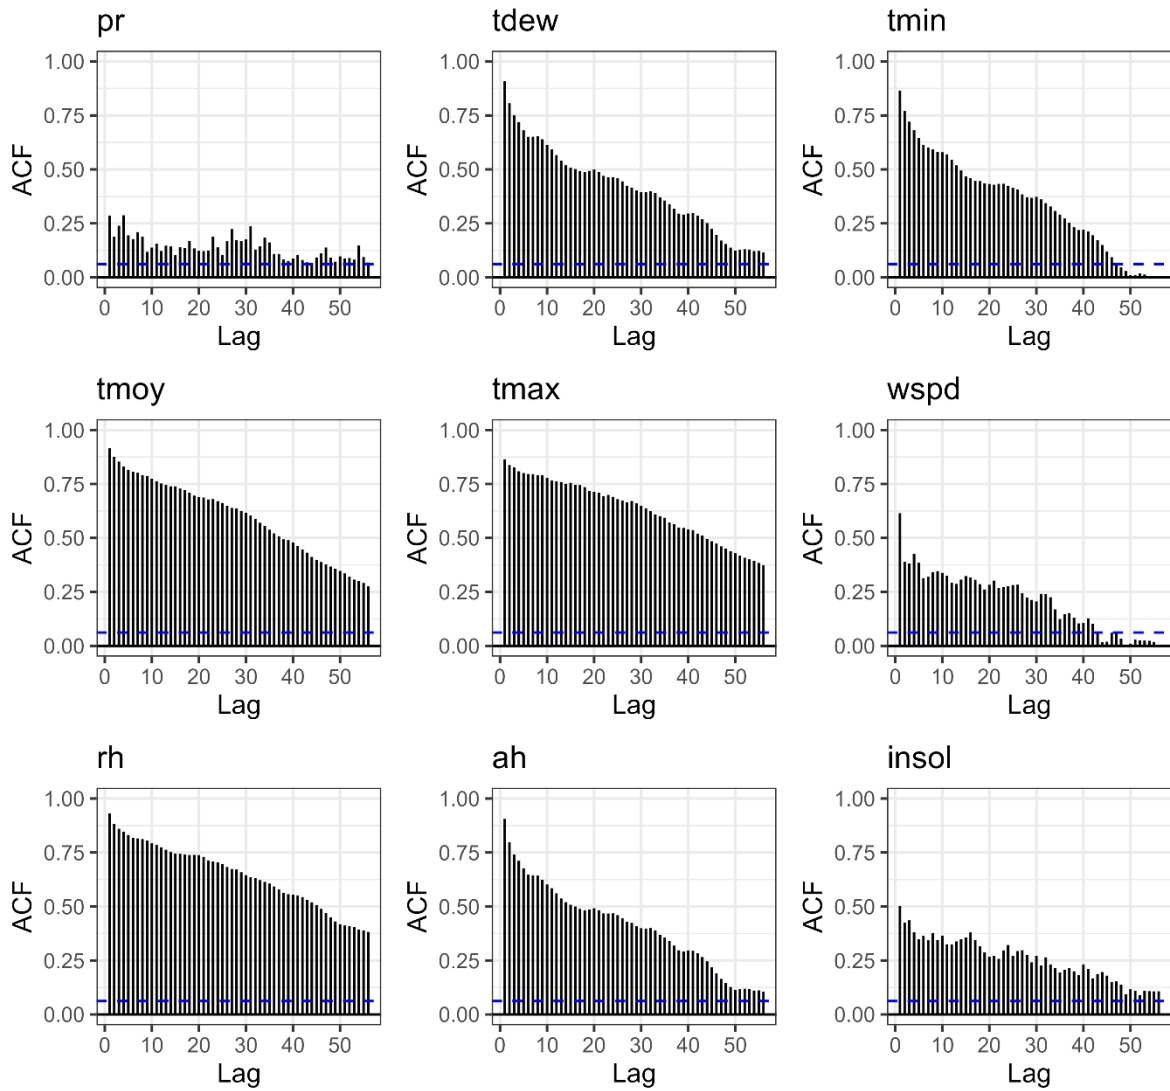

## 45) Somalia (SOM)

ACF plots for weather variables from January 1, 2020 to September 30, 2022

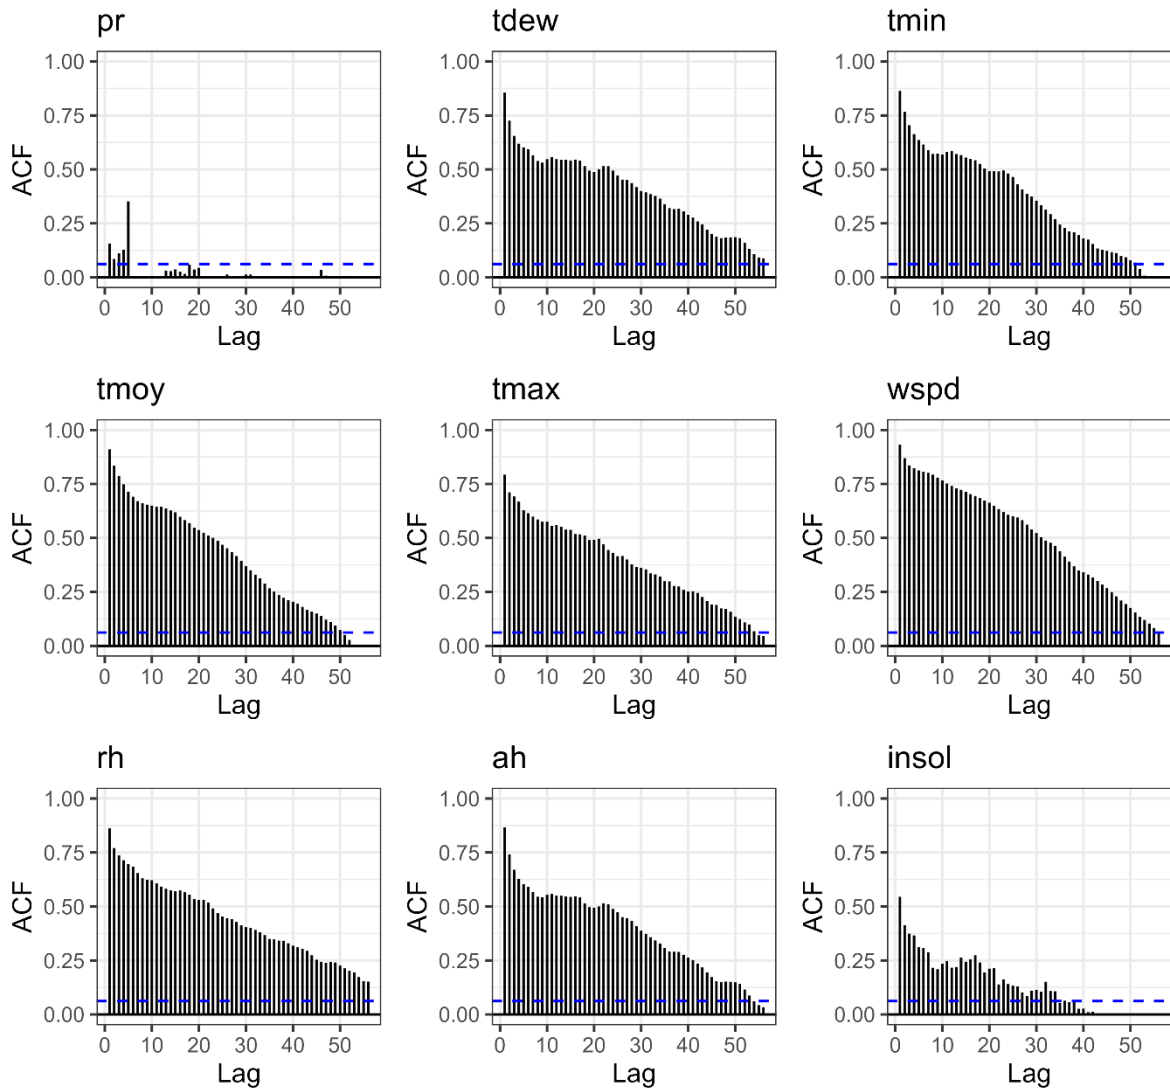

## 46) South Africa (ZAF)

ACF plots for weather variables from January 1, 2020 to September 30, 2022

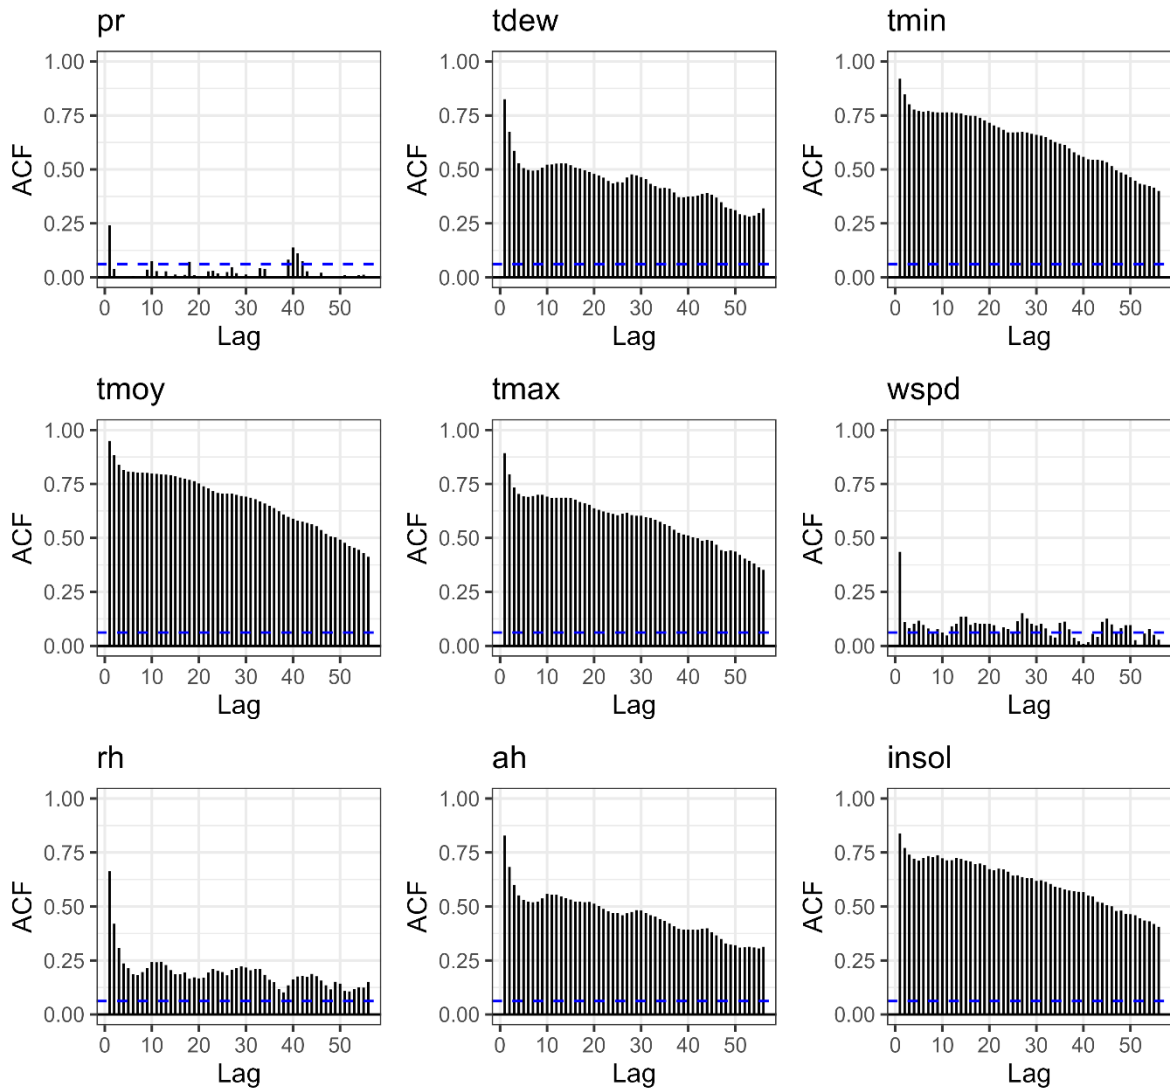

## 47) South Sudan (SSD)

ACF plots for weather variables from January 1, 2020 to September 30, 2022

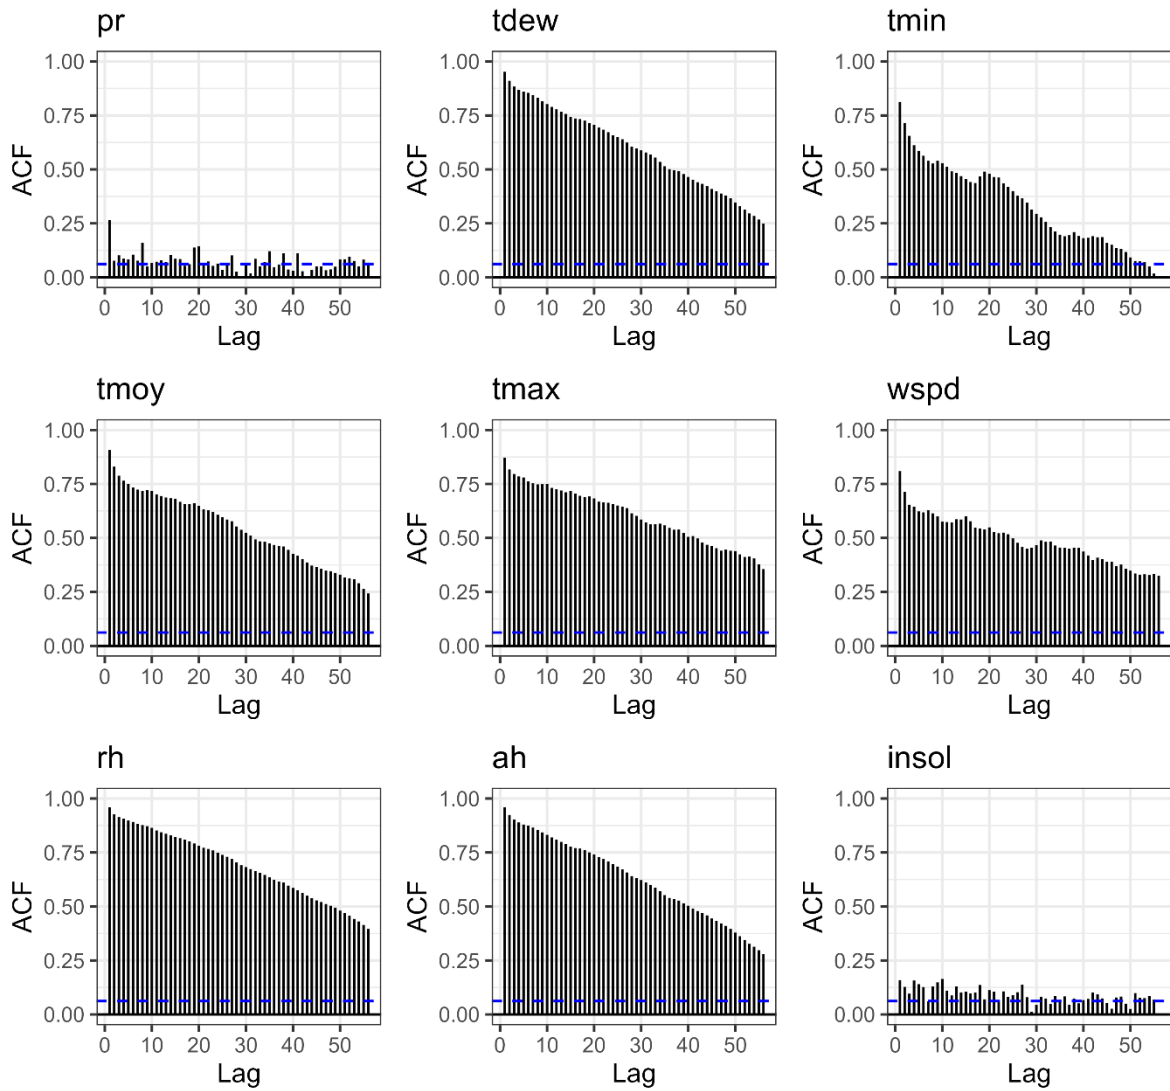



## 48) Sudan (SDN)

ACF plots for weather variables from January 1, 2020 to September 30, 2022

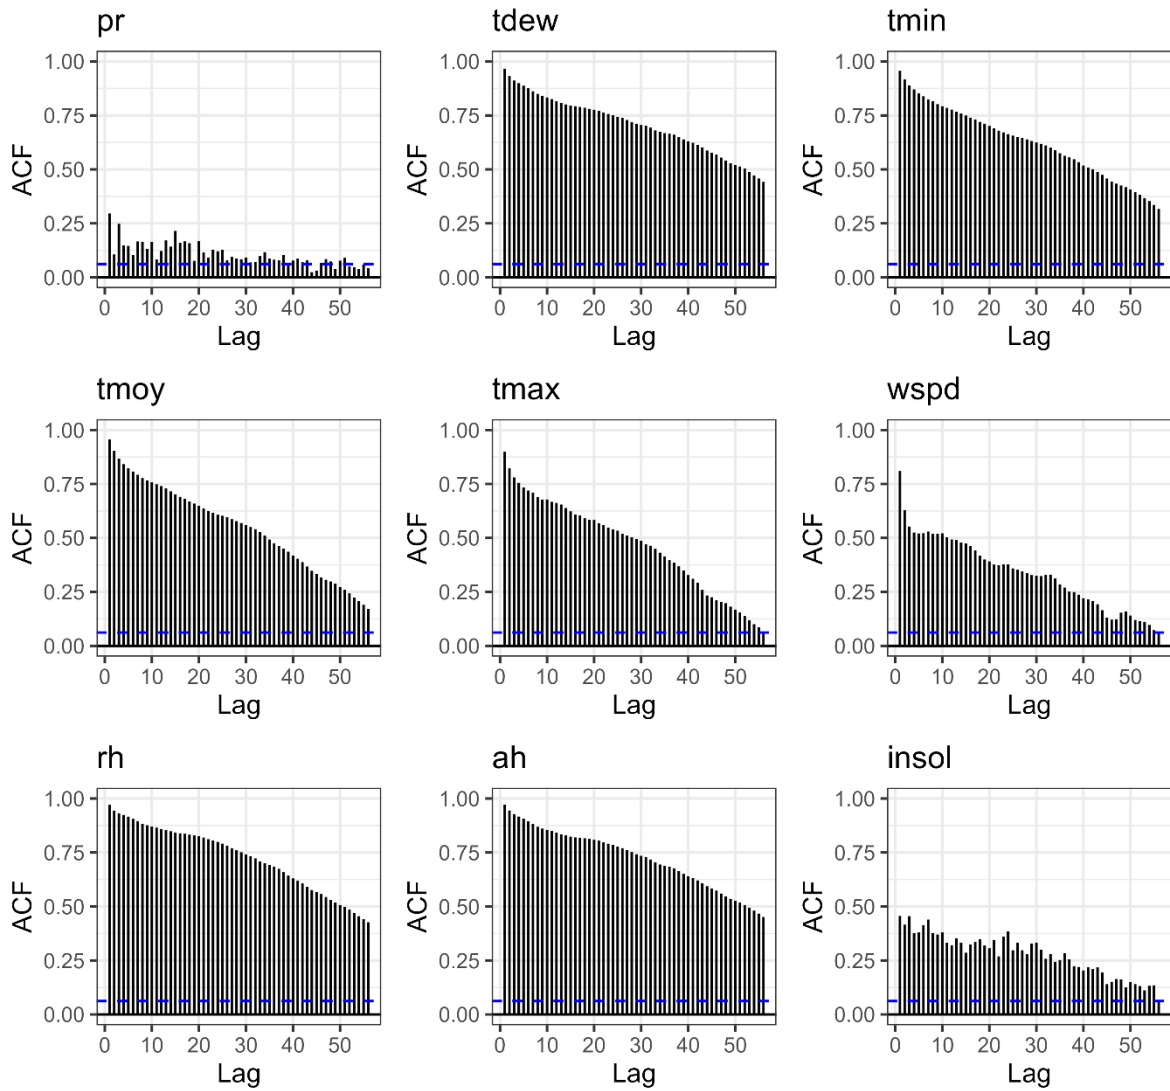

## 49) Tanzania (TZA)

ACF plots for weather variables from January 1, 2020 to September 30, 2022

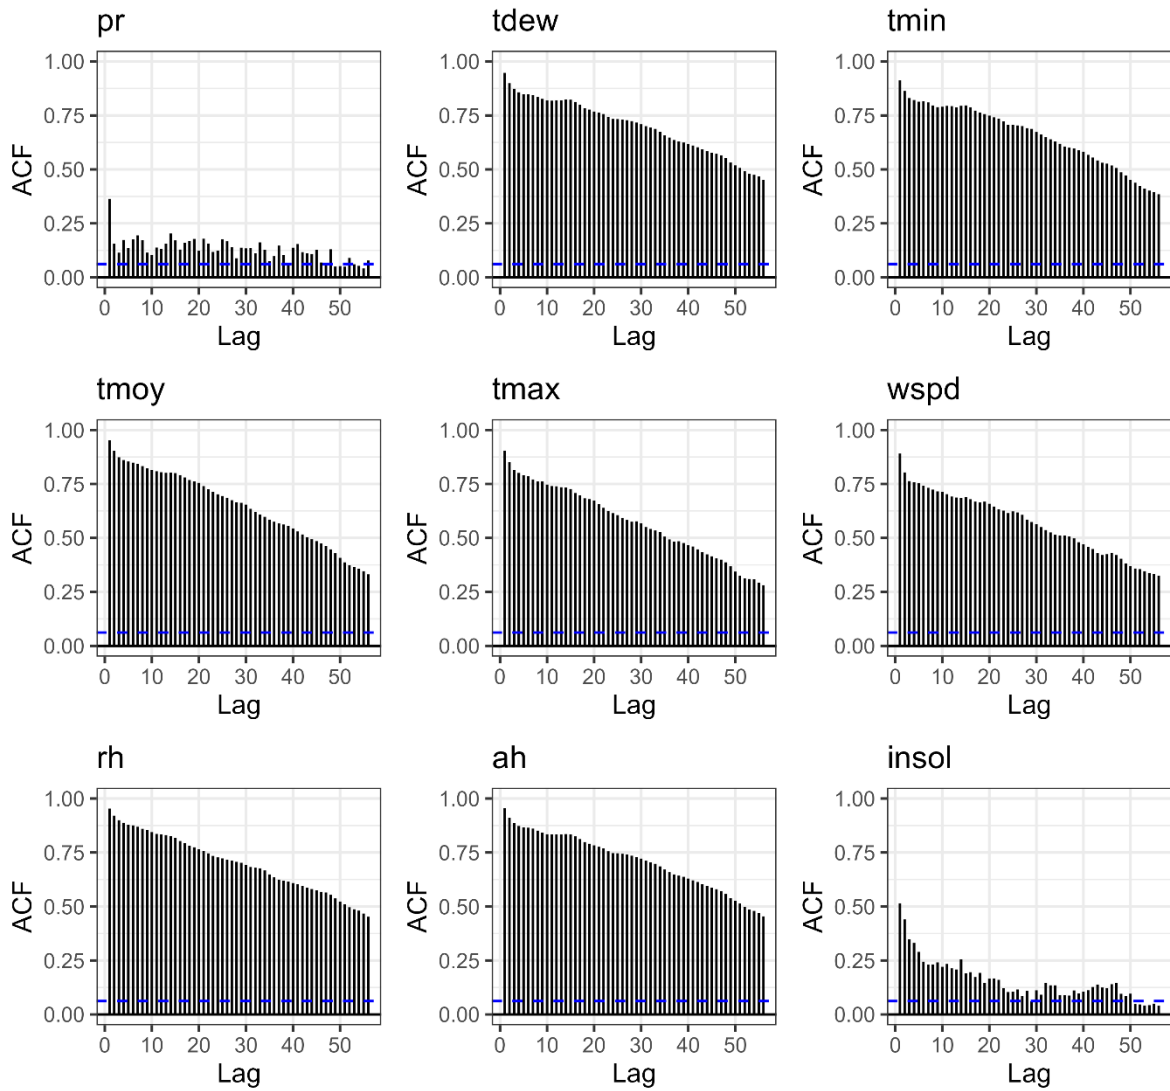

## 50) Togo (TGO)

ACF plots for weather variables from January 1, 2020 to September 30, 2022

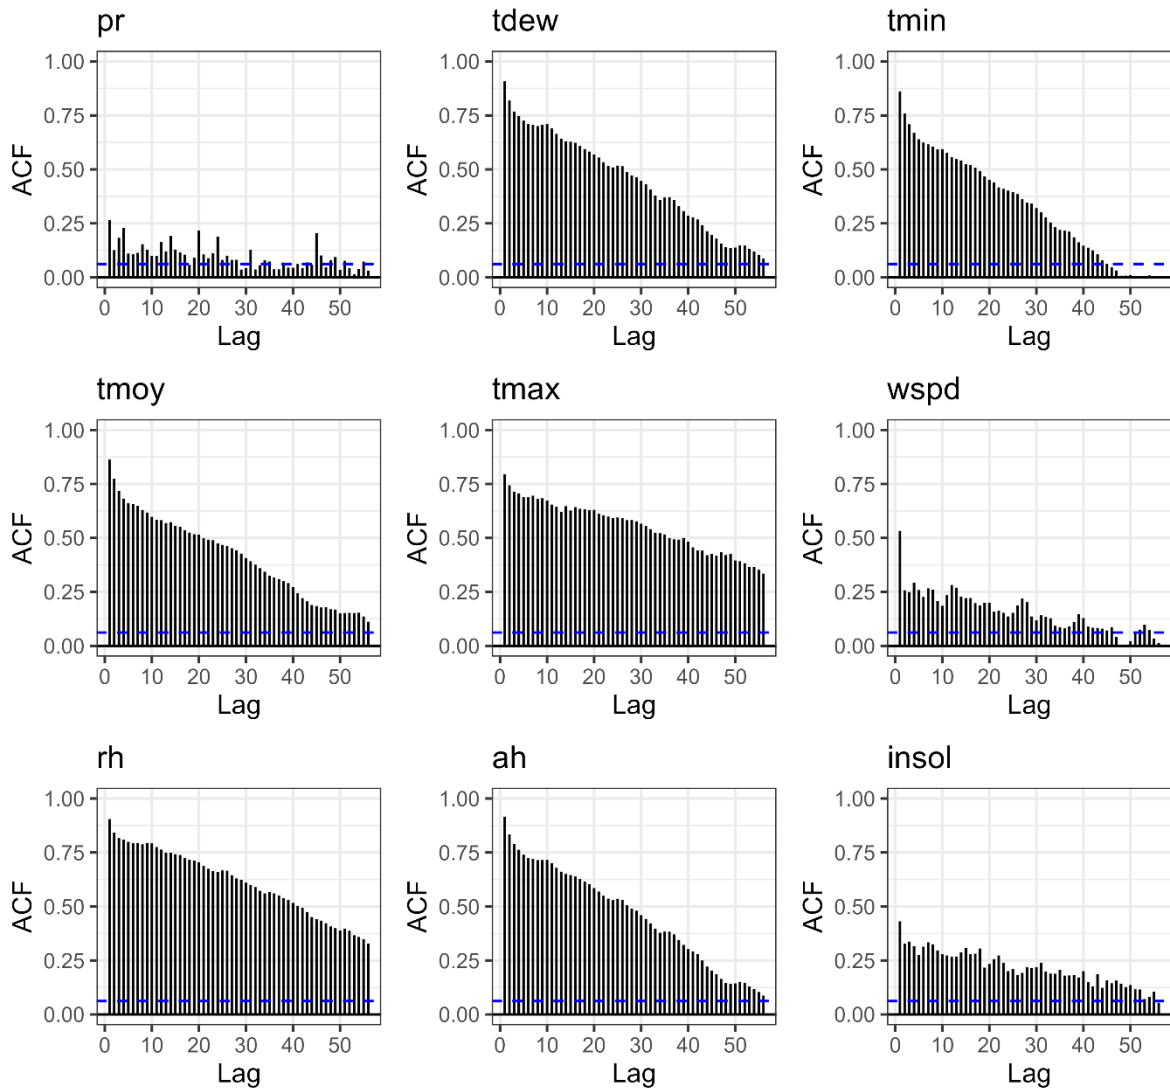

## 51) Tunisia (TUN)

ACF plots for weather variables from January 1, 2020 to September 30, 2022

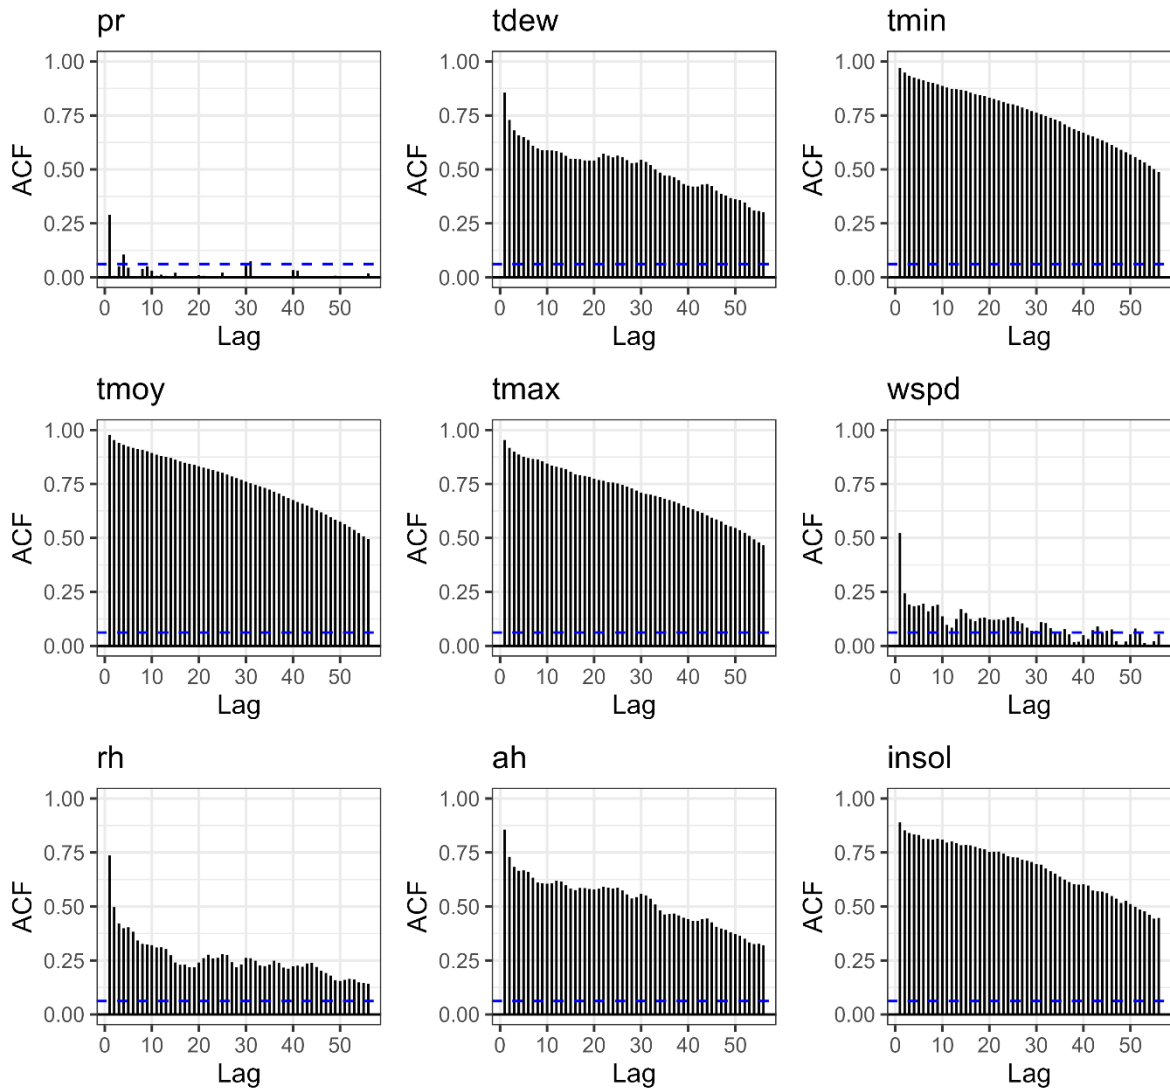

## 52) Uganda (UGA)

ACF plots for weather variables from January 1, 2020 to September 30, 2022

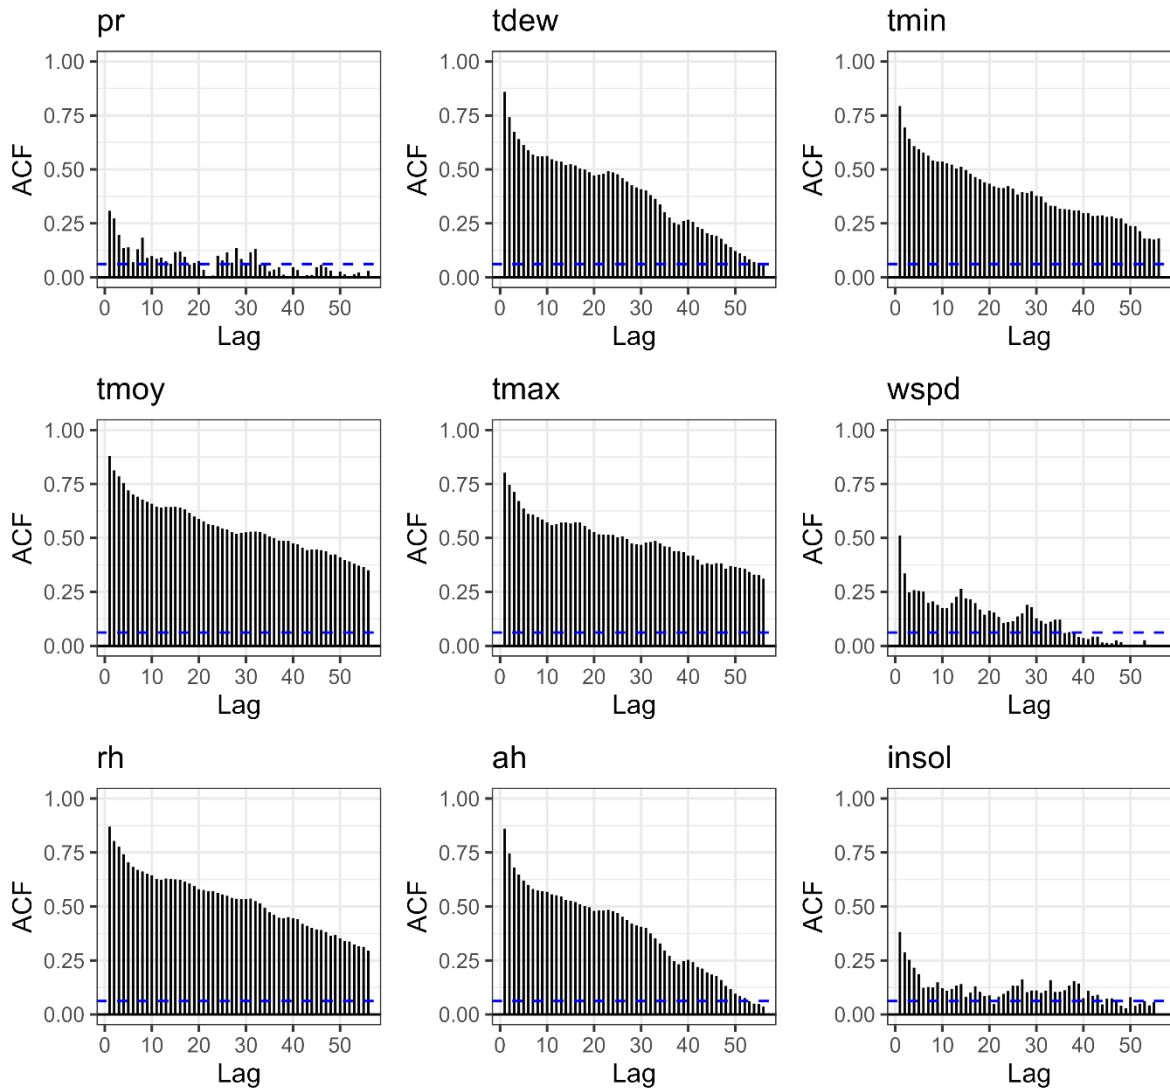

### 53) Zambia (ZMB)

ACF plots for weather variables from January 1, 2020 to September 30, 2022

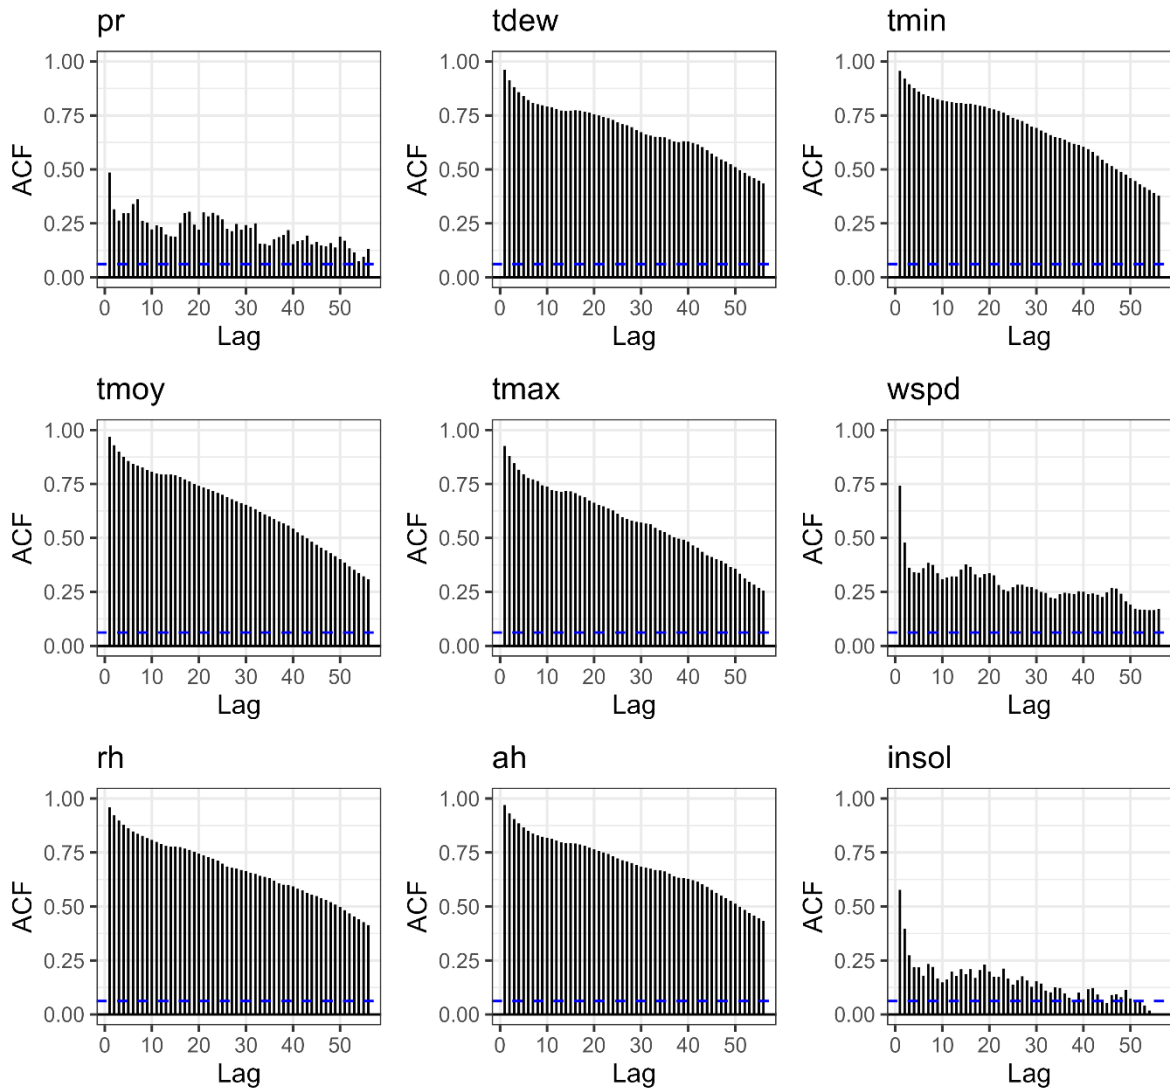

## 54) Zimbabwe (ZWE)

ACF plots for weather variables from January 1, 2020 to September 30, 2022

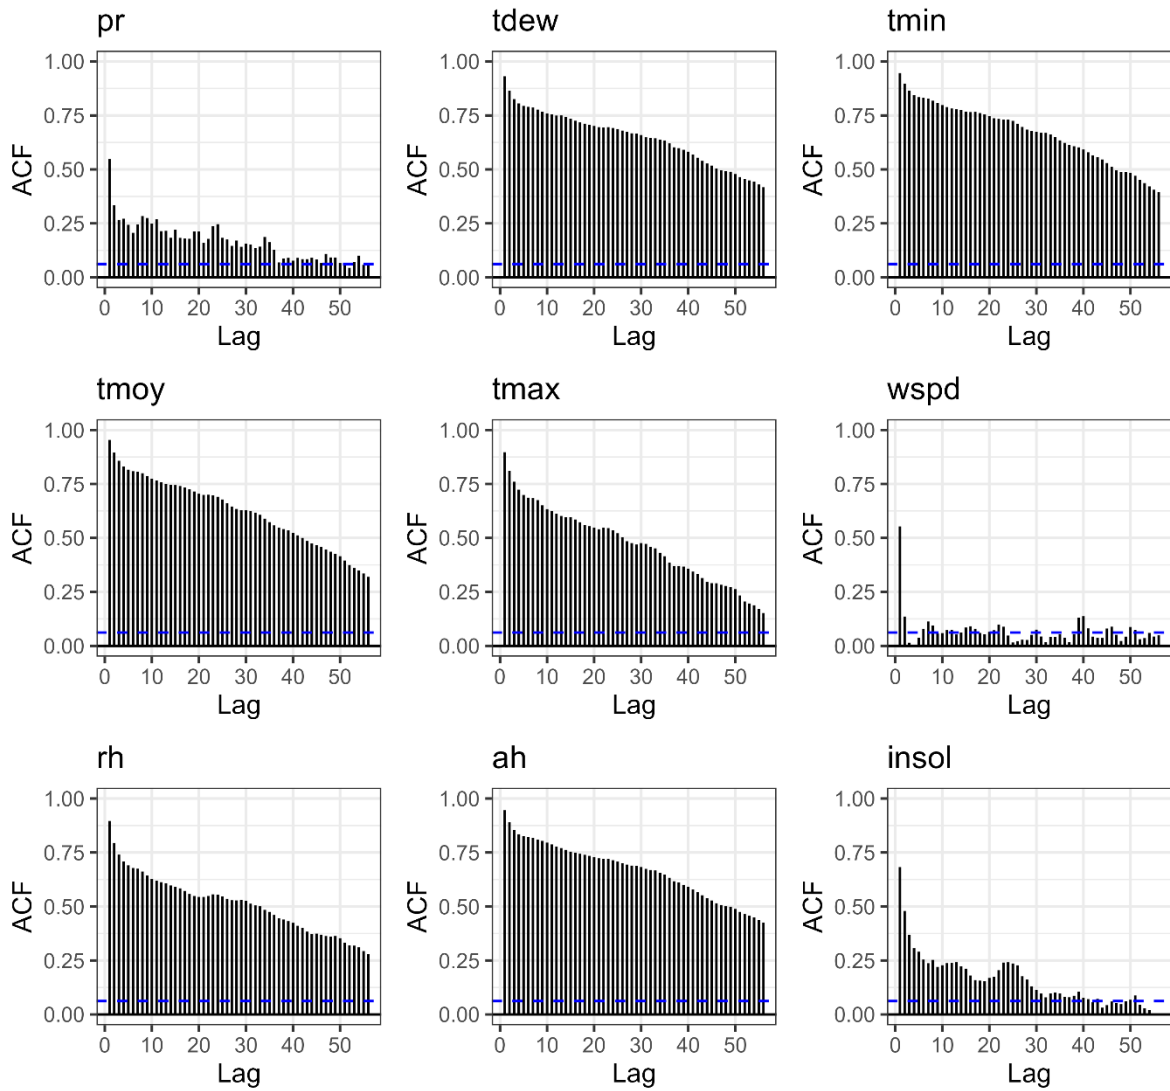

Supplement: 41598_2023_46007_MOESM1_ESM.pdf [file 41598_2023_46007_MOESM1_ESM.pdf]
